# Supplementary material for: A Predictive Strategy Based on Volatile Profile and Chemometric Analysis for Traceability and Authenticity of Sugarcane Honey on the Global Market
Source: MDPI journal article supplement (doi:10.3390/foods10071559), 2021-07-05
Supplement: s1 [file s1]

**A predictive strategy based on volatile profile and chemometric analysis for  
traceability and authenticity of sugarcane honey on the global market**

**SUPPLEMENTARY INFORMATION**

## Supplementary Information

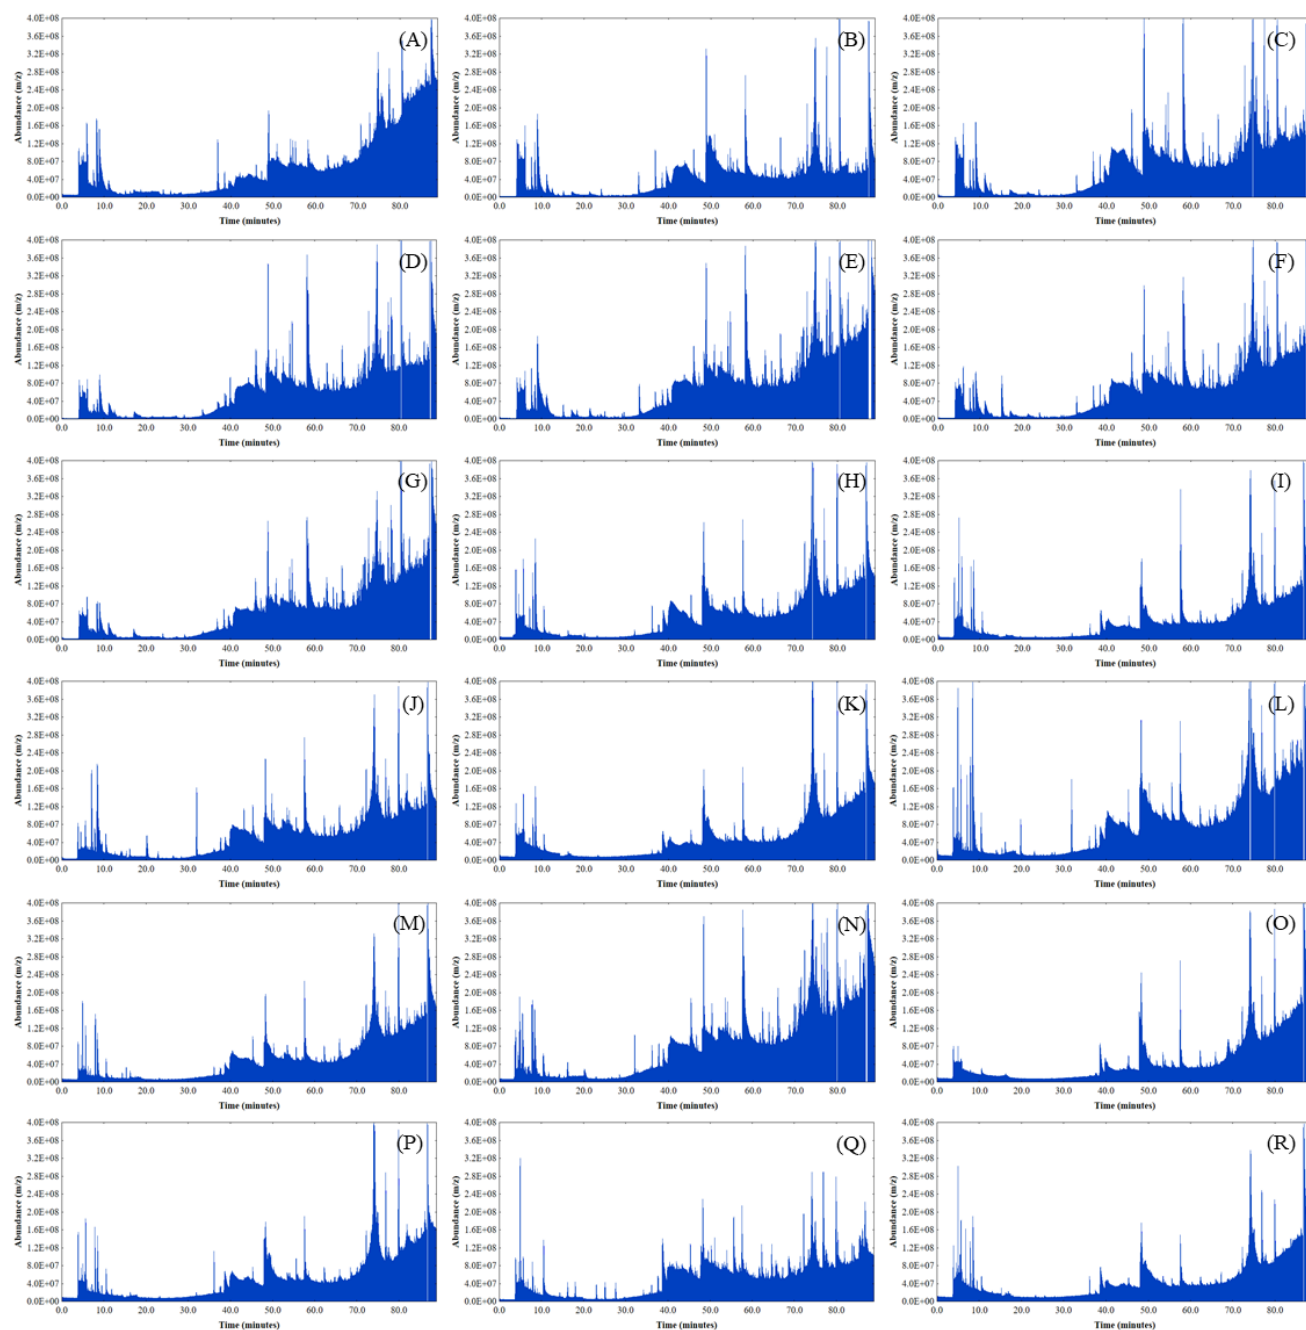

**Figure S1.** The typical GC-MS chromatograms for FRS07 (A), FRS13 (B), FRS14 (C), FRS15 (D), FRS16 (E), FRS17 (F), FRS18 (G), ECAL14 (H), NCAL14 (I), GLA14 (J), ESP16 (K), EGP17 (L), EGPA16 (M), EGPB16 (N), EGPC16 (O), MDBR14 (P), MCBR14 (Q) and AUS17 (R) samples.

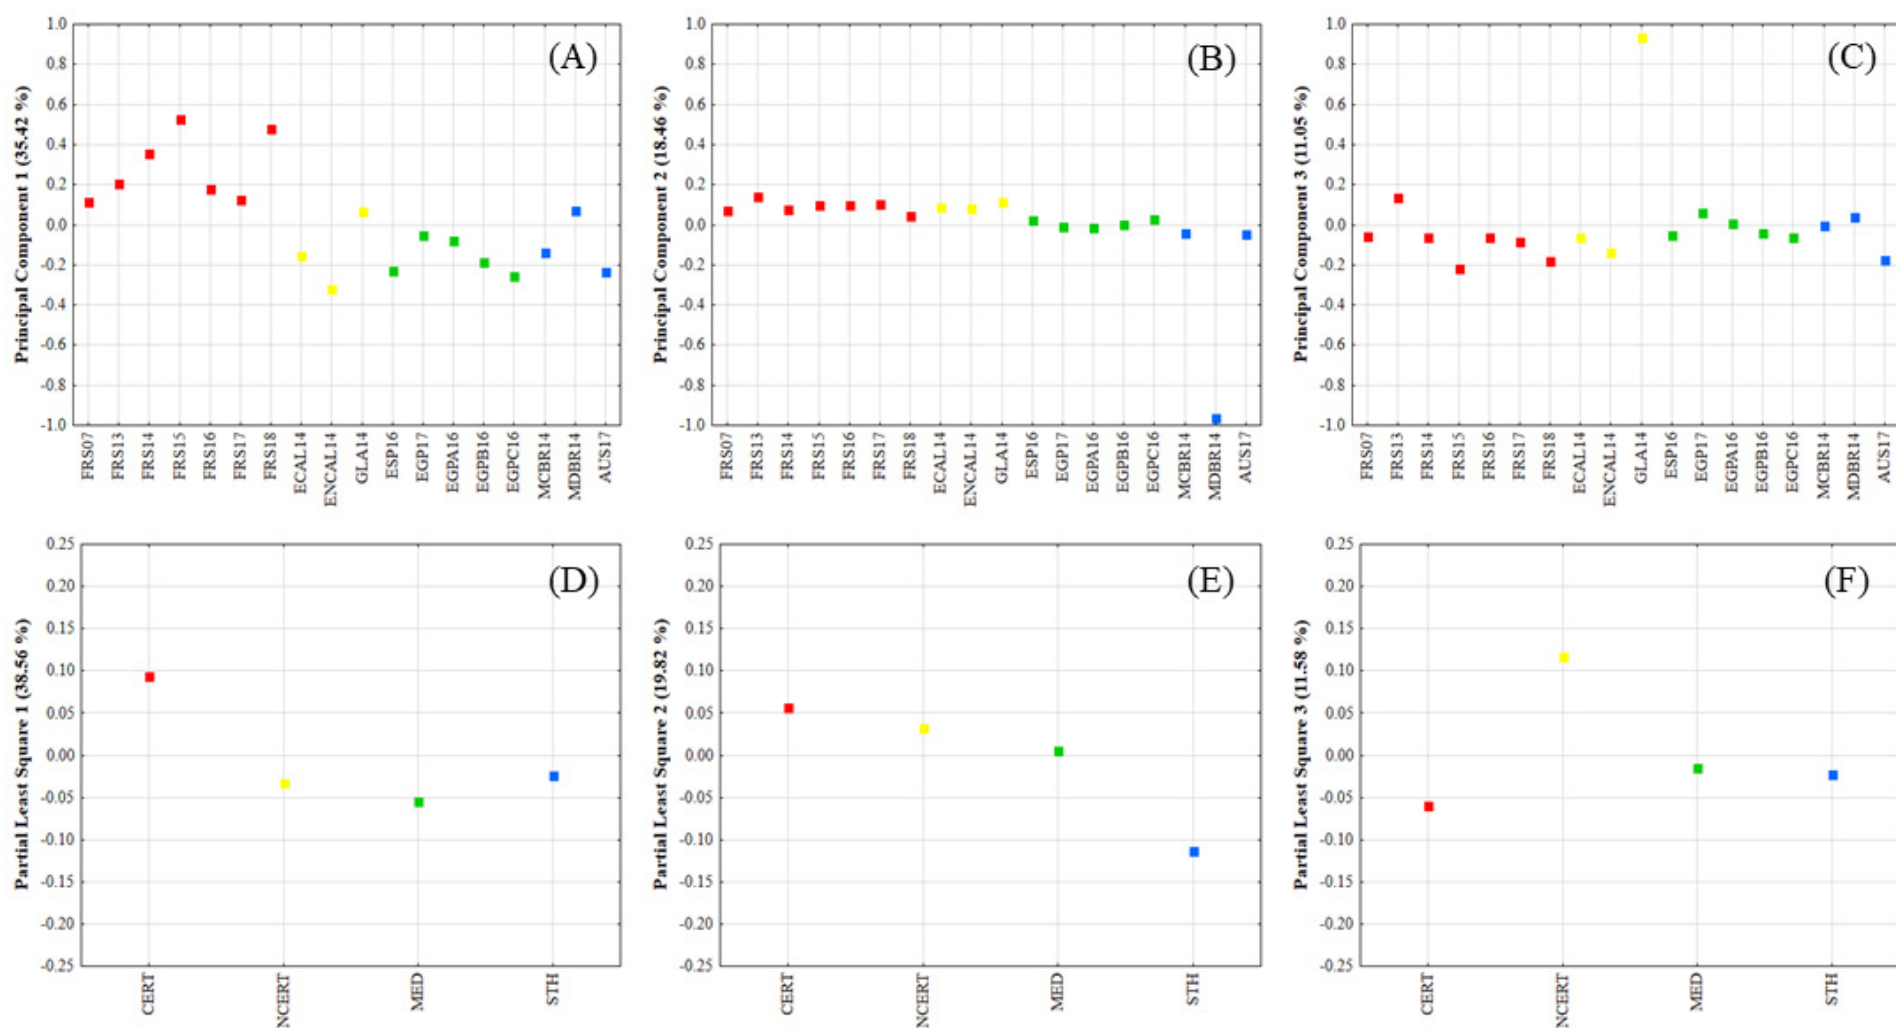

**Figure S2.** The PCA loadings line plot of all stage samples based on the selected 144 VOCs for PC1 (A), PC2 (B) and PC3 (C), and the PLS loadings line plot of all cultivar samples for PLS1 (D), PLS2 (E) and PLS3 (F).



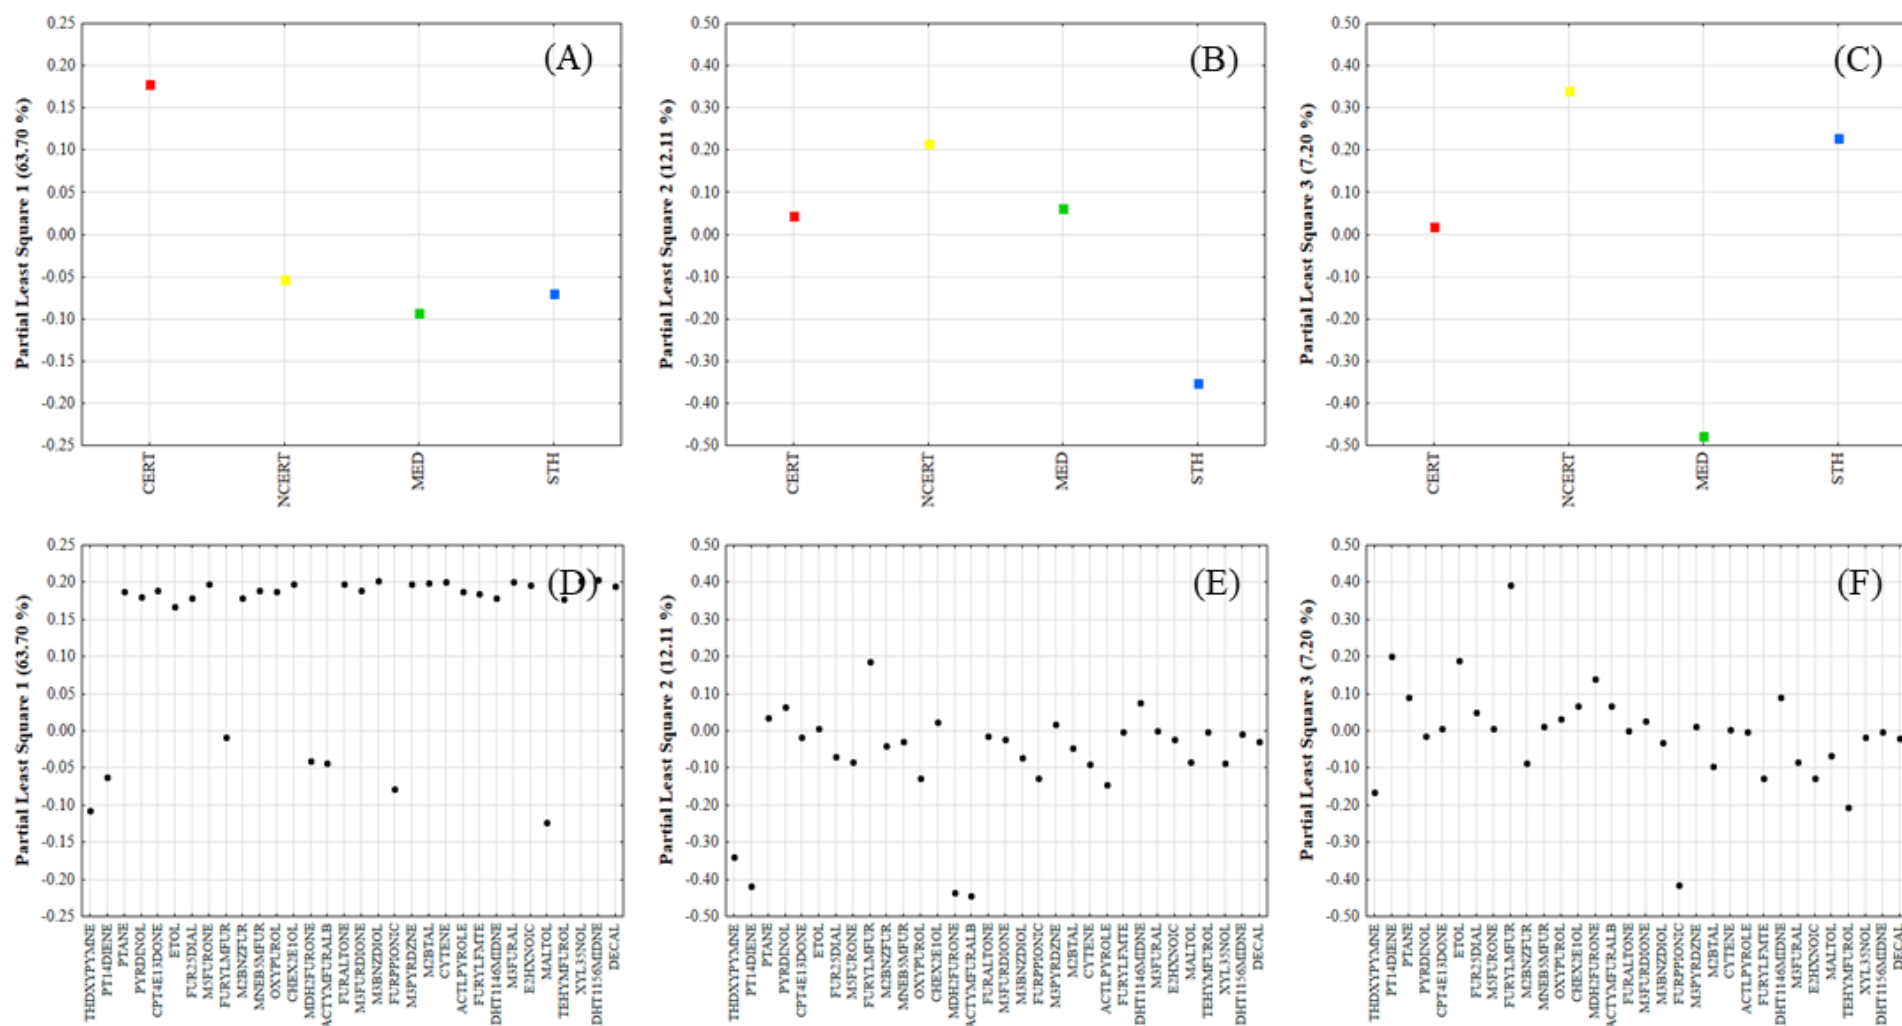

**Figure S4.** The PLS loadings line plots of all cultivar samples based on the 31 most predictive VOCs for PLS1 (A), PLS2 (B) and PLS3 (C), and the PLS loadings line plots of the 35 most predictive VOCs for PLS1 (D), PLS2 (E) and PLS3 (F).

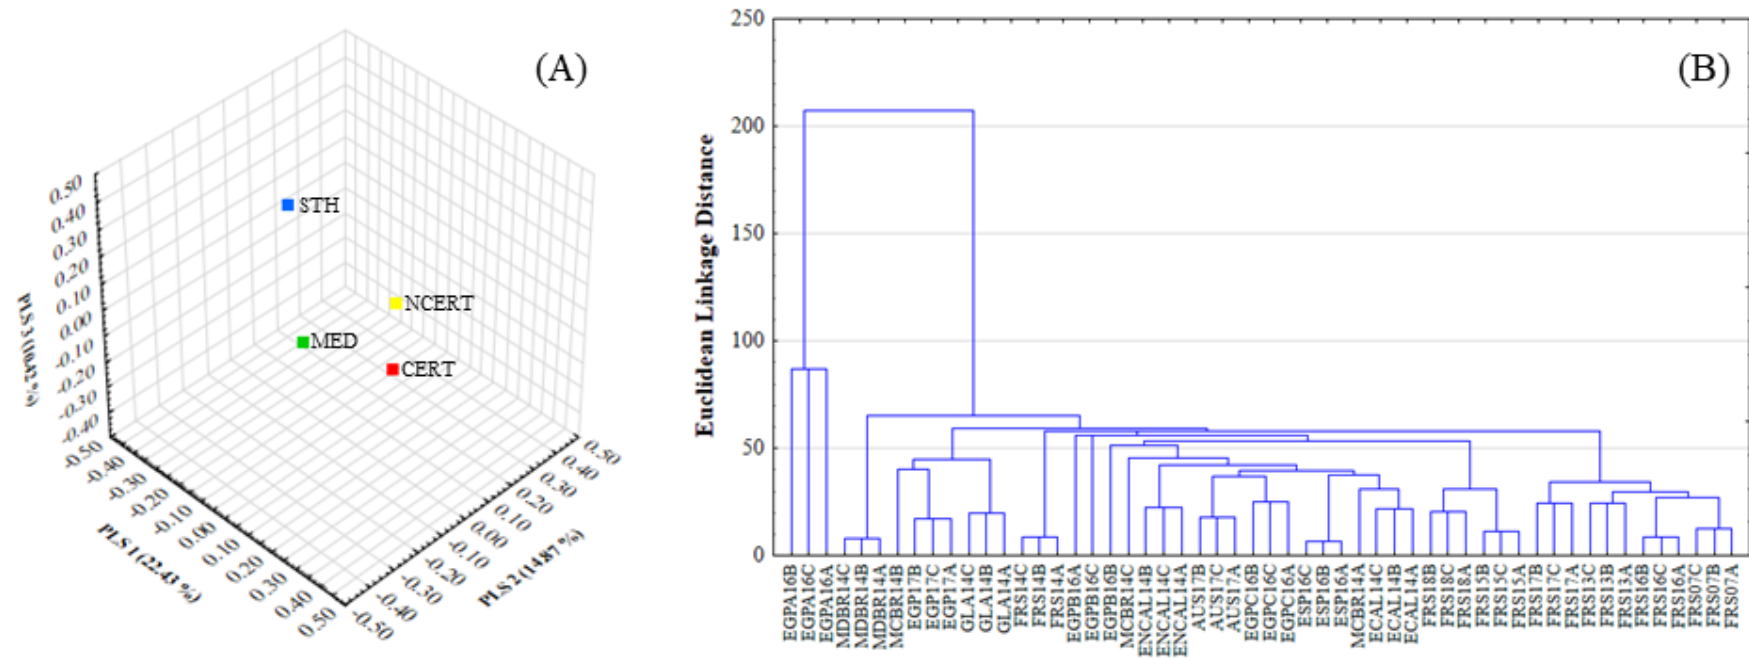

**Figure S5.** The PLS 3D plot (A) and HCA dendrogram (B) for results from the matrix reduction procedure based on the VIP scores.

**Table S1.** ID replicate number, ID replicate code, ID sample code, ID group code, processing year, processing type, geographic origin and regional certification of sugarcane-based syrups samples.

| ID Replicate Number | ID Replicate Code | ID Sample Code | ID Group Code | Processing Year | Processing Type | Geographic Origin                               | Regional Certification |
|---------------------|-------------------|----------------|---------------|-----------------|-----------------|-------------------------------------------------|------------------------|
| 1                   | FRS07A            | FRS07          | CERT          | 2007            | Industrial      | Madeira Island,<br>Portugal,<br>Atlantic Region | Certified              |
| 2                   | FRS07B            |                |               |                 |                 |                                                 |                        |
| 3                   | FRS07C            |                |               |                 |                 |                                                 |                        |
| 4                   | FRS13A            | FRS13          | CERT          | 2013            | Industrial      | Madeira Island,<br>Portugal,<br>Atlantic Region | Certified              |
| 5                   | FRS13B            |                |               |                 |                 |                                                 |                        |
| 6                   | FRS13C            |                |               |                 |                 |                                                 |                        |
| 7                   | FRS14A            | FRS14          | CERT          | 2014            | Industrial      | Madeira Island,<br>Portugal,<br>Atlantic Region | Certified              |
| 8                   | FRS14B            |                |               |                 |                 |                                                 |                        |
| 9                   | FRS14C            |                |               |                 |                 |                                                 |                        |
| 10                  | FRS15A            | FRS15          | CERT          | 2015            | Industrial      | Madeira Island,<br>Portugal,<br>Atlantic Region | Certified              |
| 11                  | FRS15B            |                |               |                 |                 |                                                 |                        |
| 12                  | FRS15C            |                |               |                 |                 |                                                 |                        |
| 13                  | FRS16A            | FRS16          | CERT          | 2016            | Industrial      | Madeira Island,<br>Portugal,<br>Atlantic Region | Certified              |
| 14                  | FRS16B            |                |               |                 |                 |                                                 |                        |
| 15                  | FRS16C            |                |               |                 |                 |                                                 |                        |
| 16                  | FRS17A            | FRS17          | CERT          | 2017            | Industrial      | Madeira Island,<br>Portugal,<br>Atlantic Region | Certified              |
| 17                  | FRS17B            |                |               |                 |                 |                                                 |                        |
| 18                  | FRS17C            |                |               |                 |                 |                                                 |                        |
| 19                  | FRS18A            | FRS18          | CERT          | 2018            | Industrial      | Madeira Island,<br>Portugal,<br>Atlantic Region | Certified              |
| 20                  | FRS18B            |                |               |                 |                 |                                                 |                        |
| 21                  | FRS18C            |                |               |                 |                 |                                                 |                        |
| 22                  | ECAL14A           | ECAL14         | NCERT         | 2014            | Industrial      | Madeira Island,<br>Portugal,<br>Atlantic Region | Non-Certified          |
| 23                  | ECAL14B           |                |               |                 |                 |                                                 |                        |
| 24                  | ECAL14C           |                |               |                 |                 |                                                 |                        |
| 25                  | ENCAL14A          | ENCAL14        | NCERT         | 2014            | Industrial      | Madeira Island,<br>Portugal,<br>Atlantic Region | Non-Certified          |
| 26                  | ENCAL14B          |                |               |                 |                 |                                                 |                        |
| 27                  | ENCAL14C          |                |               |                 |                 |                                                 |                        |
| 28                  | GLA14A            | ECAL16         | NCERT         | 2014            | Home-made       |                                                 | Non-Certified          |

|    |         |        |     |      |            |                                                 |                |
|----|---------|--------|-----|------|------------|-------------------------------------------------|----------------|
| 29 | GLA14B  |        |     |      |            | Madeira Island,<br>Portugal,<br>Atlantic Region |                |
| 30 | GLA14C  |        |     |      |            |                                                 |                |
| 31 | ESP16A  |        |     |      |            | Spain,<br>Mediterranean<br>Region               |                |
| 32 | ESP16B  | ESP16  | MED | 2016 | Industrial |                                                 | Not Applicable |
| 33 | ESP16C  |        |     |      |            |                                                 |                |
| 34 | EGP17A  |        |     |      |            | Spain,<br>Mediterranean<br>Region               |                |
| 35 | EGP17B  | EGP17  | MED | 2017 | Industrial |                                                 | Not Applicable |
| 36 | EGP17C  |        |     |      |            |                                                 |                |
| 37 | EGPA16A |        |     |      |            | Spain,<br>Mediterranean<br>Region               |                |
| 38 | EGPA16B | EGPA16 | MED | 2016 | Industrial |                                                 | Not Applicable |
| 39 | EGPA16C |        |     |      |            |                                                 |                |
| 40 | EGPB16A |        |     |      |            | Spain,<br>Mediterranean<br>Region               |                |
| 41 | EGPB16B | EGPB16 | MED | 2016 | Industrial |                                                 | Not Applicable |
| 42 | EGPB16C |        |     |      |            |                                                 |                |
| 43 | EGPC16A |        |     |      |            | Egypt,<br>Mediterranean<br>Region               |                |
| 44 | EGPC16B | EGPC16 | MED | 2016 | Industrial |                                                 | Not Applicable |
| 45 | EGPC16C |        |     |      |            |                                                 |                |
| 46 | MCBR14A |        |     |      |            | Brazil,<br>Southern Hemisphere<br>Region        |                |
| 47 | MCBR14B | MCBR14 | STH | 2014 | Industrial |                                                 | Not Applicable |
| 48 | MCBR14C |        |     |      |            |                                                 |                |
| 49 | MDBR14A |        |     |      |            | Brazil,<br>Southern Hemisphere<br>Region        |                |
| 50 | MDBR14B | MDBR14 | STH | 2014 | Industrial |                                                 | Not Applicable |
| 51 | MDBR14C |        |     |      |            |                                                 |                |
| 52 | AUS17A  |        |     |      |            | Australia,<br>Southern Hemisphere<br>Region     |                |
| 53 | AUS17B  | AUS17  | STH | 2017 | Industrial |                                                 | Not Applicable |
| 54 | AUS17C  |        |     |      |            |                                                 |                |

**Table S2.** ID number, retention time, main ions (m/z), target ion, match percent, IUPAC name, NIST database, abbreviation, CAS number, molecular formula and main chemical class of identified VOCs in sugarcane-based syrups samples.

| ID Number | RT <sup>a</sup> | m/z         | TI <sup>b</sup> | MP <sup>c</sup> (%) | ID Type <sup>d</sup> | IUPAC Name             | NIST Database Name               | Abbreviations | CAS Number | Molecular Formula | Main Chemical Class |
|-----------|-----------------|-------------|-----------------|---------------------|----------------------|------------------------|----------------------------------|---------------|------------|-------------------|---------------------|
| 1         | 4,253           | 43; 42; 41  | 43              | 86                  | RS; MS               | pentane                | Pentane                          | PTANE         | 109-66-0   | C5H12             | Hydrocarbon         |
| 2         | 4,518           | 57; 41; 56  | 57              | 84                  | RS; MS               | hexane                 | Hexane                           | HXANE         | 110-54-3   | C6H14             | Hydrocarbon         |
| 3         | 4,586           | 67; 68; 53  | 67              | 90                  | MS                   | penta-1,4-diene        | 1,4-Pentadiene                   | PT14DIENE     | 591-93-5   | C5H8              | Hydrocarbon         |
| 4         | 4,709           | 47; 48; 45  | 47              | 87                  | RS; MS               | methanethiol           | Methanethiol                     | METHIOL       | 74-93-1    | CH4S              | Sulfur              |
| 5         | 4,903           | 44; 43; 42  | 44              | 88                  | RS; MS               | acetaldehyde           | Ethanal                          | ETAL          | 75-07-0    | C2H4O             | Aldehyde            |
| 6         | 5,282           | 47; 62; 45  | 47              | 97                  | RS; MS               | methylsulfanylmethane  | Dimethyl Sulfide                 | DMSULFI       | 75-18-3    | C2H6S             | Sulfur              |
| 7         | 5,713           | 58; 57; 59  | 58              | 79                  | RS; MS               | propanal               | Propanal                         | PPAL          | 123-38-6   | C3H6O             | Aldehyde            |
| 8         | 5,830           | 68; 39; 40  | 68              | 91                  | RS; MS               | furan                  | Furan                            | FUR           | 110-00-9   | C4H4O             | Furan               |
| 9         | 6,041           | 43; 41; 72  | 72              | 86                  | MS                   | 2-methylpropanal       | 2-Methyl-Propanal                | MPPAL         | 78-84-2    | C4H8O             | Aldehyde            |
| 10        | 6,255           | 31; 45; 74  | 31              | 80                  | RS; MS               | ethyl formate          | Ethyl Ester Formic Acid          | EESTFA        | 109-94-4   | C3H6O2            | Ester               |
| 11        | 6,632           | 56; 55; 37  | 56              | 78                  | MS                   | prop-2-enal            | 2-Propenal                       | PPENAL        | 107-02-8   | C3H4O             | Aldehyde            |
| 12        | 7,199           | 82; 53; 81  | 82              | 94                  | MS                   | 2-methylfuran          | 2-Methyl-Furan                   | M2FUR         | 534-22-5   | C5H6O             | Furan               |
| 13        | 7,591           | 43; 61; 70  | 43              | 90                  | RS; MS               | ethyl acetate          | Ethyl Ester Acetic Acid          | EESTAA        | 141-78-6   | C4H8O2            | Ester               |
| 14        | 7,906           | 43; 72; 57  | 72              | 78                  | RS; MS               | butan-2-one            | 2-Butanone                       | BT2ONE        | 78-93-3    | C4H8O             | Ketone              |
| 15        | 8,338           | 57; 41; 58  | 57              | 86                  | MS                   | 2-methylbutanal        | 2-Methyl-Butanal                 | M2BTAL        | 96-17-3    | C5H10O            | Aldehyde            |
| 16        | 8,494           | 44; 41; 43  | 41              | 93                  | MS                   | 3-methylbutanal        | 3-Methyl-Butanal                 | M3BTAL        | 590-86-3   | C5H10O            | Aldehyde            |
| 17        | 8,946           | 31; 45; 46  | 31              | 78                  | RS; MS               | ethanol                | Ethanol                          | ETOL          | 64-17-5    | C2H6O             | Alcohol             |
| 18        | 9,379           | 78; 77; 52  | 78              | 83                  | RS; MS               | Benzene                | Benzene                          | BNZ           | 71-43-2    | C6H6              | Benzene             |
| 19        | 9,569           | 55; 43; 70  | 55              | 80                  | MS                   | but-3-en-2-one         | 3-Buten-2-one                    | BT3ONE        | 78-94-4    | C4H6O             | Ketone              |
| 20        | 10,058          | 96; 95; 43  | 96              | 94                  | MS                   | 2,5-dimethylfuran      | 2,5-Dimethyl-Furan               | DM25FUR       | 625-86-5   | C6H8O             | Furan               |
| 21        | 10,190          | 57; 75; 102 | 57              | 82                  | MS                   | ethyl propanoate       | Ethyl Ester Propanoic Acid       | EESTPA        | 105-37-3   | C5H10O2           | Ester               |
| 22        | 11,412          | 43; 86; 41  | 86              | 80                  | MS                   | butane-2,3-dione       | 2,3-Butanedione                  | BT23DONE      | 431-03-8   | C4H6O2            | Ketone              |
| 23        | 12,557          | 43; 56; 73  | 56              | 82                  | MS                   | 2-methylpropyl acetate | 2-Methylpropyl Ester Acetic Acid | MP2ESTAA      | 110-19-0   | C6H12O2           | Ester               |
| 24        | 14,801          | 31; 59; 42  | 31              | 80                  | RS; MS               | propan-1-ol            | 1-Propanol                       | PIPOL         | 71-23-8    | C3H8O             | Alcohol             |
| 25        | 14,903          | 95; 110; 43 | 95              | 86                  | MS                   | 2-ethyl-5-methylfuran  | 2-Ethyl-5-Methyl-Furan           | E2M5FUR       | 1703-52-2  | C7H10O            | Furan               |
| 26        | 15,111          | 91; 92; 65  | 91              | 94                  | RS; MS               | toluene                | Toluene                          | TOLNE         | 108-88-3   | C7H8              | Benzene             |

|    |        |                  |     |    |        |                                   |                                      |             |                |         |                     |
|----|--------|------------------|-----|----|--------|-----------------------------------|--------------------------------------|-------------|----------------|---------|---------------------|
| 27 | 15,268 | 43; 71; 88       | 88  | 84 | MS     | ethyl butanoate                   | Ethyl Ester Butanoic Acid            | EESTBA      | 105-54-4       | C6H12O2 | Ester               |
| 28 | 15,327 | 71; 43; 59       | 71  | 78 | MS     | 2-methylbut-3-en-2-ol             | 2-Methyl-3-Buten-2-ol                | M3BT2OL     | 115-18-4       | C5H10O  | Alcohol             |
| 29 | 16,166 | 101; 55;<br>73   | 101 | 82 | MS     | nonomethyl succinate              | Monomethyl Ester<br>Butanedioic Acid | METESTBA    | 3878-55-5      | C5H8O4  | Ester               |
| 30 | 17,382 | 43; 57;<br>100   | 57  | 83 | MS     | pentane-2,3-dione                 | 2,3-Pentanedione                     | PTDONE      | 600-14-6       | C5H8O2  | Ketone              |
| 31 | 18,081 | 94; 45; 79       | 94  | 90 | MS     | (methyldisulfanyl)methane         | Dimethyl Disulfide                   | DMDSFD      | 624-92-0       | C2H6S2  | Sulfur              |
| 32 | 18,284 | 94; 65; 39       | 94  | 78 | MS     | 2-ethenylfuran                    | 2-Ethenyl-Furan                      | ENYL2FUR    | 1487-18-9      | C6H6O   | Furan               |
| 33 | 18,723 | 81; 99; 55       | 81  | 83 | MS     | 2,5-diethyloxolane                | 2,5-Diethyltetrahydro-Furan          | DE25TTHYFUR | 41239-48-<br>9 | C8H16O  | Furan               |
| 34 | 18,905 | 44; 56; 43       | 44  | 94 | RS; MS | hexanal                           | Hexanal                              | HXAL        | 66-25-1        | C6H12O  | Aldehyde            |
| 35 | 21,231 | 43; 42; 41       | 43  | 90 | RS; MS | 2-methylpropan-1-ol               | 2-Methyl-1-Propanol                  | M2PP1OL     | 78-83-1        | C4H10O  | Alcohol             |
| 36 | 25,551 | 85; 41; 56       | 85  | 80 | MS     | 5-butyloxolan-2-one               | 5-Butyl-Dihydro-2(3H)-<br>Furanone   | BDH2FURONE  | 104-50-7       | C8H14O2 | Furan               |
| 37 | 27,262 | 108; 107;<br>77  | 108 | 80 | MS     | 3-methylphenol                    | m-Cresol                             | MCREOL      | 108-39-4       | C7H8O   | Phenol              |
| 38 | 27,966 | 56; 31; 41       | 56  | 80 | RS; MS | butan-1-ol                        | 1-Butanol                            | BT1OL       | 71-36-3        | C4H10O  | Alcohol             |
| 39 | 28,085 | 85; 56; 41       | 85  | 82 | MS     | 5-propyloxolan-2-one              | 5-Propyl-Dihydro-2(3H)-<br>Furanone  | PDH2FURONE  | 105-21-5       | C7H12O2 | Furan               |
| 40 | 29,054 | 94; 39; 65       | 94  | 87 | MS     | 3-methylpyridazine                | 3-Methyl-Pyridazine                  | M3PYRDZNE   | 1632-76-4      | C5H6N2  | Nitrogen            |
| 41 | 29,851 | 43; 58; 71       | 58  | 91 | RS; MS | heptan-2-one                      | 2-Heptanone                          | HPT2ONE     | 110-43-0       | C7H14O  | Ketone              |
| 42 | 32,080 | 95; 138;<br>67   | 95  | 85 | MS     | 1-methyl-3-propan-2-ylcyclohexane | m-Menthane                           | MMTHANE     | 16580-24-<br>8 | C10H20  | Terpenoid           |
| 43 | 32,436 | 80; 53; 52       | 80  | 80 | MS     | pyrimidine                        | 1,3-Diazine                          | D13ZINE     | 289-95-2       | C4H4N2  | Nitrogen            |
| 44 | 32,630 | 57; 41; 56       | 57  | 83 | RS; MS | 2-methylbutan-1-ol                | 2-Methyl-1-Butanol                   | M2BT1OL     | 137-32-6       | C5H12O  | Alcohol             |
| 45 | 33,174 | 82; 53; 81       | 82  | 90 | MS     | 2-propylfuran                     | 2-Propyl-Furan                       | PP2FUR      | 4229-91-8      | C7H10O  | Furan               |
| 46 | 34,163 | 88; 43; 99       | 88  | 83 | MS     | ethyl hexanoate                   | Ethyl Ester Hexanoic Acid            | EESTHA      | 123-66-0       | C8H16O2 | Ester               |
| 47 | 34,394 | 81; 82;<br>138   | 81  | 94 | MS     | 2-pentylfuran                     | 2-Pentyl-Furan                       | PT2FUR      | 3777-69-3      | C9H14O  | Furan               |
| 48 | 36,565 | 94; 67; 53       | 94  | 81 | MS     | 2-methylpyrazine                  | 2-Methyl-Pyrazine                    | MPYZNE      | 109-08-0       | C5H6N   | Nitrogen            |
| 49 | 37,622 | 43; 72;<br>100   | 72  | 91 | MS     | 2-methyloxolan-3-one              | 2-Methyl-Dihydro-2(3H)-<br>Furanone  | MDH2FURONE  | 3188-00-9      | C5H8O2  | Furan               |
| 50 | 37,261 | 119; 134;<br>91  | 119 | 84 | MS     | 1-methyl-4-propan-2-ylbenzene     | p-Cymene                             | PCYMNE      | 99-87-6        | C10H14  | Terpenoid           |
| 51 | 37,369 | 105; 120;<br>77  | 105 | 95 | MS     | 1,3,5-trimethylbenzene            | Mesitylene                           | MESTLNE     | 108-67-8       | C9H12   | Benzene             |
| 52 | 38,007 | 122; 107;<br>121 | 122 | 80 | MS     | 3,5-dimethylphenol                | 3,5-Xylenol                          | XYL35NOL    | 108-68-9       | C8H10O  | Phenol              |
| 53 | 38,238 | 45; 43; 88       | 45  | 90 | MS     | 3-hydroxybutan-2-one              | 3-Hydroxy-2-Butanone                 | HXY3BT2ONE  | 513-86-0       | C4H8O2  | Ketone<br>(Alcohol) |
| 54 | 38,261 | 86; 42; 58       | 86  | 82 | MS     | 1,3-dioxol-2-one                  | Vinylene Carbonate                   | VYLESTCA    | 96-49-1        | C3H4O3  | Ester (Ketone)      |

|    |        |                  |     |    |        |                                               |                                                 |              |            |          |                      |
|----|--------|------------------|-----|----|--------|-----------------------------------------------|-------------------------------------------------|--------------|------------|----------|----------------------|
| 55 | 38,738 | 122; 107;<br>121 | 122 | 82 | MS     | 2,6-dimethylphenol                            | 2,6-Xylenol                                     | XYL26NOL     | 576-26-1   | C8H10O   | Phenol               |
| 56 | 39,324 | 43; 31; 74       | 43  | 90 | MS     | 1-hydroxypropan-2-one                         | 1-Hydroxy-2-Propanone                           | HXY1PP2ONE   | 116-09-6   | C3H6O2   | Ketone<br>(Alcohol)  |
| 57 | 40,500 | 108; 42;<br>40   | 108 | 80 | MS     | 2,5-dimethylpyrazine                          | 2,5-Dimethyl-Pyrazine                           | DM25PYZNE    | 123-32-0   | C6H8N2   | Nitrogen             |
| 58 | 40,910 | 108; 42;<br>40   | 108 | 90 | MS     | 2,6-dimethylpyrazine                          | 2,6-Dimethyl-Pyrazine                           | DM26PYZNE    | 108-50-9   | C6H8N2   | Nitrogen             |
| 59 | 42,422 | 82; 39; 54       | 82  | 91 | MS     | cyclopent-2-en-1-one                          | 2-Cyclopenten-1-one                             | CY2PT1EONE   | 930-30-3   | C5H6O    | Ketone               |
| 60 | 41,788 | 159; 174;<br>144 | 159 | 82 | MS     | 1,2,3,4-tetramethyl-5-prop-1-en-2-ylbenzene   | 1,2,3,4-Tetramethyl-4-(1-methylethenyl)-Benzene | TM4MEYL1BNZ  | 61142-76-5 | C13H20   | Benzene              |
| 61 | 43,239 | 67; 96; 53       | 67  | 83 | MS     | 2-methylcyclopent-2-en-1-one                  | 2-Methyl-2-Cyclopenten-1-one                    | M2CY2PT1EONE | 1120-73-6  | C6H8O    | Ketone               |
| 62 | 43,444 | 95; 43; 96       | 95  | 80 | MS     | (5-methylfuran-2-yl)methanethiol              | 5-Methyl-2-Furanmethanethiol                    | M2FURTHOL    | 59303-05-8 | C6H8OS   | Furan (Sulfur)       |
| 63 | 43,682 | 57; 88; 56       | 57  | 79 | MS     | 1-hydroxybutan-2-one                          | 1-Hydroxy-2-Butanone                            | H1BT2ONE     | 5077-67-8  | C4H8O2   | Ketone<br>(Alcohol)  |
| 64 | 44,389 | 121; 122;<br>39  | 121 | 80 | MS     | 2-ethyl-6-methylpyrazine                      | 2-Ethyl-6-Methyl-Pyrazine                       | E6MPYZNE     | 13925-03-6 | C7H10N2  | Nitrogen             |
| 65 | 44,691 | 121; 122;<br>39  | 121 | 77 | MS     | 2-ethyl-5-methylpyrazine                      | 2-Ethyl-5-Methyl-Pyrazine                       | E5MPYZNE     | 13360-64-0 | C7H10N2  | Nitrogen             |
| 66 | 45,234 | 57; 41; 43       | 57  | 93 | RS; MS | nonanal                                       | Nonanal                                         | NONAL        | 124-19-6   | C9H18O   | Aldehyde             |
| 67 | 45,745 | 42; 122;<br>81   | 122 | 78 | MS     | 2,3,5-trimethylpyrazine                       | Trimethyl-Pyrazine                              | TMPYZNE      | 14667-55-1 | C7H10N2  | Nitrogen             |
| 68 | 45,956 | 67; 95;<br>124   | 67  | 81 | MS     | (3E)-3-ethyl-2-methylhexa-1,3-diene           | 3-Ethyl-2-Methyl-1,3-Hexadiene                  | E3M2HX13DENE | 61142-36-7 | C9H16    | Terpene              |
| 69 | 46,726 | 68; 96; 40       | 68  | 82 | MS     | cyclohex-2-en-1-one                           | 2-Cyclohexen-1-one                              | C2HEXONE     | 930-68-7   | C6H8O    | Ketone               |
| 70 | 46,901 | 55; 43; 98       | 55  | 87 | MS     | 2-methyl-2H-furan-5-one                       | 5-Methyl-2(3H)-Furanone                         | M5FURONE     | 591-12-8   | C5H6O2   | Furan                |
| 71 | 47,214 | 98; 42; 69       | 98  | 84 | MS     | 4-methyl-1,3-dihydroimidazol-2-one            | 1,3-Dihydro-4-Methyl-2H-Imidazol-2-one          | M4IMDZONE    | 214-751-9  | C4H6N2O  | Nitrogen<br>(Ketone) |
| 72 | 47,569 | 88; 101;<br>57   | 88  | 89 | MS     | ethyl octanoate                               | Ethyl Ester Octanoic Acid                       | EESTOA       | 106-32-1   | C10H20O2 | Ester                |
| 73 | 47,861 | 159; 174;<br>131 | 159 | 94 | MS     | 1,2,3,4-tetrahydro-1,1,6-trimethylnaphthalene | 1,2,3,4-Tetrahydro-1,1,6-Trimethyl-Naphthalene  | T116TNP      | 475-03-6   | C13H18   | Naphthalene          |
| 74 | 48,559 | 96; 95; 39       | 96  | 96 | RS; MS | 2-furaldehyde                                 | Furfural                                        | FURAL        | 98-01-1    | C5H4O2   | Furan<br>(Aldehyde)  |
| 75 | 49,502 | 43; 45; 60       | 43  | 90 | RS; MS | Acetic Acid                                   | Ethanoic Acid                                   | ETNOIC       | 64-19-7    | C2H4O2   | Carboxylic<br>Acid   |
| 76 | 49,783 | 159; 174;<br>131 | 159 | 96 | MS     | 1,2,3,4-tetrahydro-1,6,8-trimethylnaphthalene | 1,2,3,4-Tetrahydro-1,6,8-Trimethyl-Naphthalene  | T168TNP      | 30316-36-0 | C13H18   | Naphthalene          |
| 77 | 50,004 | 57; 41; 55       | 57  | 82 | MS     | 2-ethylhexan-1-ol                             | 2-Ethyl-1-Hexanol                               | E2HX1OL      | 104-76-7   | C8H18O   | Alcohol              |
| 78 | 50,131 | 110; 109;<br>53  | 110 | 92 | MS     | 3-methyl-2-furaldehyde                        | 3-Methyl-Furfural                               | M3FURAL      | 33342-48-2 | C6H6O2   | Furan<br>(Aldehyde)  |

|     |        |                                |     |    |        |                                               |                                                |              |                |          |                       |
|-----|--------|--------------------------------|-----|----|--------|-----------------------------------------------|------------------------------------------------|--------------|----------------|----------|-----------------------|
| 79  | 50,259 | 81; 53;<br>126                 | 81  | 82 | MS     | furan-2-ylmethyl formate                      | Furfuryl Formate                               | FURYLFMTE    | 13493-97-<br>5 | C6H6O3   | Furan (Ester)         |
| 80  | 50,655 | 57; 43; 55<br>95; 110;<br>39   | 57  | 93 | RS; MS | decanal                                       | Decanal                                        | DECAL        | 112-31-2       | C10H2O   | Aldehyde              |
| 81  | 50,895 | 106; 105;<br>77                | 95  | 91 | RS; MS | 1-(furan-2-yl)ethanone                        | 1-(2-Furanyl)-Ethanone                         | FURYLONE     | 1192-62-7      | C6H6O2   | Furan (Ketone)        |
| 82  | 51,329 | 81; 98; 52                     | 106 | 95 | RS; MS | benzaldehyde                                  | Benzaldehyde                                   | BENZAL       | 100-52-7       | C7H6O    | Benzene<br>(Aldehyde) |
| 83  | 51,771 | 74; 45; 73                     | 81  | 95 | MS     | furan-2-ylmethyl acetate                      | Furfuryl Acetate                               | FURYLACTE    | 623-17-6       | C7H8O3   | Furan (Ester)         |
| 84  | 52,336 | 63; 78; 45<br>159; 174;<br>131 | 74  | 90 | RS; MS | propanoic acid                                | Propanoic Acid                                 | PPANOIC      | 79-09-4        | C3H6O2   | Carboxylic<br>Acid    |
| 85  | 53,078 | 110; 109;<br>53                | 63  | 91 | MS     | methylsulfinylmethane                         | Dimethyl Sulfoxide                             | DMSULFO      | 67-68-5        | C2H6OS   | Sulfur                |
| 86  | 53,245 | 96; 42; 68<br>131; 132;<br>103 | 159 | 94 | MS     | 1,2,3,4-tetrahydro-1,5,8-trimethylnaphthalene | 1,2,3,4-Tetrahydro-1,5,8-Trimethyl-Naphthalene | T158TNP      | 21693-51-<br>6 | C13H18   | Naphthalene           |
| 87  | 53,657 | 109; 124;<br>81                | 110 | 94 | MS     | 5-methyl-2-furaldehyde                        | 5-Methyl-Furfural                              | M5FURAL      | 620-02-0       | C6H6O2   | Furan<br>(Aldehyde)   |
| 88  | 54,207 | 45; 59; 72                     | 96  | 91 | MS     | cyclopent-4-ene-1,3-dione                     | 4-Cyclopentene-1,3-dione                       | CPT4E13DONE  | 930-60-9       | C5H4O2   | Ketone                |
| 89  | 54,861 | 42; 41; 56<br>159; 174;<br>128 | 131 | 97 | MS     | 2-methyl-1-benzofuran                         | 2-Methyl-Benzofuran                            | M2BNZFUR     | 4265-25-2      | C9H8O    | Benzofuran            |
| 90  | 55,678 | 91; 92;<br>120                 | 109 | 80 | MS     | 1-(5-methylfuran-2-yl)ethanone                | 1-(5-Methyl-2-Furanyl)-Ethanone                | M5FURYLONE   | 1193-79-9      | C7H8O2   | Furan (Ketone)        |
| 91  | 55,835 | 69; 41;<br>112                 | 45  | 90 | MS     | 2-(2-ethoxyethoxy)ethanol                     | Diethylene Glycol Ethyl Ether                  | DENGOLEETHR  | 111-90-0       | C6H14O3  | Ether (Alcohol)       |
| 92  | 56,251 | 72; 55; 45<br>88; 101;<br>73   | 42  | 82 | MS     | 3-methyloxolan-3-one                          | 3-Methyl-Dihydro-2(3H)-Furanone                | M3DHFURONE   | 1679-47-6      | C5H8O2   | Furan<br>(Lactone)    |
| 93  | 56,693 | 105; 77;<br>51                 | 159 | 86 | MS     | 3,3,5,7-tetramethyl-1,2-dihydroindene         | 2,3-Dihydro-1,1,4,6-Tetramethyl-1H-Indene      | DHT1146MIDNE | 941-60-6       | C13H18   | Indene                |
| 94  | 57,065 | 98; 41; 81                     | 91  | 90 | MS     | 2-phenylacetaldehyde                          | Benzeneacetaldehyde                            | BENZACETAL   | 122-78-1       | C8H8O    | Benzene<br>(Aldehyde) |
| 95  | 57,117 | 98; 41; 97                     | 91  | 87 | MS     | 2,4-dimethyl-2H-furan-5-one                   | 3,5-Dimethyl-Dihydro-2-Furanone                | DM35DHFURONE | 5584-69-0      | C6H8O2   | Furan<br>(Lactone)    |
| 96  | 57,323 | 162; 91;<br>43                 | 72  | 78 | MS     | prop-2-enoic acid                             | 2-Propenoic Acid                               | PPE2NOIC     | 79-10-7        | C3H4O2   | Carboxylic<br>Acid    |
| 97  | 57,337 |                                | 88  | 89 | MS     | ethyl decanoate                               | Ethyl Ester Decanoic Acid                      | EESTDA       | 110-38-3       | C12H24O2 | Ester                 |
| 98  | 57,354 |                                | 105 | 87 | MS     | 1-phenylethanone                              | Acetophenone                                   | ACETPHONE    | 98-86-2        | C8H8O    | Benzene<br>(Ketone)   |
| 99  | 57,744 |                                | 98  | 98 | RS; MS | furan-2-ylmethanol                            | 2-Furanmethanol                                | FUR2OL       | 98-00-0        | C5H6O2   | Furan<br>(Alcohol)    |
| 100 | 57,981 |                                | 97  | 93 | MS     | furan-3-ylmethanol                            | 3-Furanmethanol                                | FUR3OL       | 4412-91-3      | C5H6O2   | Furan<br>(Alcohol)    |
| 101 | 58,675 |                                | 159 | 86 | MS     | 3,3,5,6-tetramethyl-1,2-dihydroindene         | 2,3-Dihydro-1,1,5,6-Tetramethyl-1H-Indene      | DHT1156MIDNE | 942-43-8       | C13H18   | Indene                |
| 102 | 58,897 |                                | 162 | 91 | MS     | 2-(2-furylmethyl)-5-methylfuran               | 2-(2-Furanylmethyl)-5-Methyl-Furan             | FURYLMFUR    | 13678-51-<br>8 | C10H10O2 | Furan                 |

|     |        |              |     |    |        |                                                          |                                       |              |            |          |                    |
|-----|--------|--------------|-----|----|--------|----------------------------------------------------------|---------------------------------------|--------------|------------|----------|--------------------|
| 103 | 60,229 | 41; 69; 98   | 41  | 83 | MS     | 4-methyl-2H-furan-5-one                                  | 3-Methyl-2(5H)-Furanone               | M3FURONE     | 22122-36-7 | C5H6O2   | Furan (Lactone)    |
| 104 | 60,456 | 95; 112; 43  | 95  | 93 | MS     | (5-methylfuran-2-yl)methanol                             | 5-Methyl-2-Furanmethanol              | M5FUR2OL     | 3857-25-8  | C6H8O2   | Furan (Alcohol)    |
| 105 | 60,947 | 108; 91; 90  | 108 | 75 | MS     | benzyl acetate                                           | Phenylmethyl Ester Acetic Acid        | PMESTAA      | 140-11-4   | C9H10O2  | Benzene (Ester)    |
| 106 | 61,749 | 55; 84; 54   | 55  | 80 | MS     | 2H-furan-5-one                                           | 2(5H)-Furanone                        | FURONE       | 497-23-4   | C4H4O2   | Furan (Lactone)    |
| 107 | 62,073 | 176; 43; 161 | 176 | 96 | MS     | 2-methyl-5-[(5-methylfuran-2-yl)methyl]furan             | 2,2'-Methylenebis[5-Methyl-Furan      | MNEB5MFUR    | 13679-43-1 | C10H10O2 | Furan              |
| 108 | 62,421 | 98; 55; 42   | 98  | 90 | MS     | cyclopentane-1,2-dione                                   | 1,2-Cyclopentanedione                 | CPT12DONE    | 3008-40-0  | C5H6O2   | Ketone             |
| 109 | 63,971 | 70; 39; 41   | 70  | 84 | MS     | cyclohex-2-en-1-ol                                       | 2-Cyclohexenol                        | CHEX2E1OL    | 822-67-3   | C6H10O   | Alcohol            |
| 110 | 64,539 | 104; 43; 91  | 104 | 84 | MS     | 2-phenylethyl acetate                                    | 2-Phenylethyl Ester Acetic Acid       | PEESTAA      | 103-45-7   | C10H12O2 | Benzene (Ester)    |
| 111 | 64,803 | 112; 69; 41  | 112 | 93 | MS     | 3-methylcyclopentane-1,2-dione                           | 3-Methyl-1,2-Cyclopentanedione        | M3CPT12DONE  | 765-70-8   | C6H8O2   | Ketone             |
| 112 | 64,824 | 73; 88; 41   | 73  | 89 | MS     | 2-ethylhexanoic acid                                     | 2-Ethyl-Hexanoic Acid                 | E2HXNOIC     | 149-57-5   | C8H16O2  | Carboxylic Acid    |
| 113 | 64,922 | 69; 121; 41  | 69  | 96 | RS; MS | 1-(2,6,6-trimethylcyclohexa-1,3-dien-1-yl)but-2-en-1-one | $\beta$ -Damascenone                  | DAMSNONE     | 23726-93-4 | C13H18O  | Terpenoid (Ketone) |
| 114 | 65,265 | 88; 101; 73  | 88  | 80 | MS     | ethyl undecanoate                                        | Ethyl Ester Undecanoic Acid           | EESTUNDA     | 627-90-7   | C13H26O2 | Ester              |
| 115 | 65,660 | 43; 41; 73   | 43  | 79 | MS     | 2-methylpropanoic acid                                   | 2-Methyl-Propanoic Acid               | M2PPOICA     | 79-31-2    | C4H8O2   | Carboxylic Acid    |
| 116 | 65,986 | 128; 57; 85  | 128 | 77 | MS     | 1,3-diazinane-2,4,6-trione                               | 2,4,6-Trihydroxypyrimidine            | THDXYPYMNE   | 67-52-7    | C4H4N2O3 | Nitrogen           |
| 117 | 66,118 | 109; 124, 81 | 109 | 90 | MS     | 4-methoxyphenol                                          | Mequinol                              | MEQNOL       | 150-76-5   | C7H8O2   | Phenol (Ether)     |
| 118 | 66,384 | 114; 58; 57  | 114 | 84 | MS     | 2,2-diethyl-3-methyl-1,3-oxazolidine                     | 2,2-Diethyl-3-Methyl-Oxazolidine      | DEMOXZDNE    |            | C8H17NO  | Nitrogen           |
| 119 | 66,461 | 109; 152, 52 | 109 | 82 | MS     | 1,7-dihydropyrazolo[3,4-d]pyrimidine-4,6-dione           | Oxypurinol                            | OXYPUROL     | 2465-59-0  | C5H4N4O2 | Nitrogen           |
| 120 | 66,688 | 79; 108; 77  | 79  | 92 | MS     | phenylmethanol                                           | Benzenemethanol                       | BENZMTOL     | 100-51-6   | C7H8O    | Benzene (Alcohol)  |
| 121 | 67,106 | 69; 41; 39   | 69  | 87 | MS     | 3-methyl-2H-furan-5-one                                  | 4-Methyl-2(5H)-Furanone               | M4FUR2ONE    | 6124-79-4  | C5H6O2   | Furan (Lactone)    |
| 122 | 67,293 | 126; 55; 83  | 126 | 95 | MS     | 3-ethyl-2-hydroxycyclopent-2-en-1-one                    | 3-Ethyl-2-Hydroxy-2-Cyclopenten-1-one | E3H2C2PT1ONE | 21835-01-8 | C7H10O2  | Ketone (Alcohol)   |
| 123 | 68,036 | 91; 92; 122  | 91  | 78 | MS     | 2-phenylethanol                                          | Benzeneethanol                        | BENZETOL     | 60-12-8    | C8H10O   | Benzene (Alcohol)  |
| 124 | 68,580 | 44; 71; 55   | 44  | 80 | RS; MS | prop-2-enamide                                           | Acrylamide                            | ACRYLMDE     | 79-06-1    | C3H5NO   | Nitrogen           |
| 125 | 68,698 | 61; 44; 43   | 61  | 79 | MS     | (2S,3R)-butane-1,2,3,4-tetrol                            | Erythritol                            | ERYTOL       | 149-32-6   | C4H10O4  | Alcohol (Polyol)   |

|     |        |                   |     |    |        |                                               |                                                  |               |            |         |                                |
|-----|--------|-------------------|-----|----|--------|-----------------------------------------------|--------------------------------------------------|---------------|------------|---------|--------------------------------|
| 126 | 68,890 | 112; 111;<br>39   | 112 | 80 | MS     | 2,3-dimethyl-1H-pyrazol-5-one                 | 2,3-Dimethyl-3-Pyrazolin-5-one                   | DM23PYZLONE   | 3201-28-3  | C5H8N2O | Nitrogen                       |
| 127 | 69,323 | 136; 121;<br>65   | 136 | 87 | MS     | (E)-4-(furan-2-yl)but-3-en-2-one              | Furfural Acetone                                 | FURALTONE     | 623-15-4   | C8H8O2  | Furan (Ketone)                 |
| 128 | 69,469 | 112; 69;<br>55    | 112 | 85 | MS     | 2-hydroxy-3-methylcyclopent-2-en-1-one        | Cyclotene                                        | CYTENE        | 80-71-7    | C6H8O2  | Ketone<br>(Alcohol)            |
| 129 | 69,557 | 124; 95;<br>107   | 124 | 80 | MS     | 2-methylbenzene-1,4-diol                      | 2-Methyl-1,4-Benzenediol                         | M2BNZ14DIOL   | 95-71-6    | C7H8O2  | Benzene<br>(Alcohol)           |
| 130 | 69,706 | 73; 60; 41        | 73  | 77 | RS; MS | heptanoic Acid                                | Heptanoic Acid                                   | HPTOIC        | 111-14-8   | C7H14O2 | Carboxylic<br>Acid             |
| 131 | 69,883 | 126; 71;<br>43    | 126 | 95 | RS; MS | 3-hydroxy-2-methylpyran-4-one                 | Maltol                                           | MALTOL        | 118-71-8   | C6H6O3  | Pyran                          |
| 132 | 70,149 | 94; 109;<br>66    | 94  | 95 | MS     | 1-(1H-pyrrol-2-yl)ethanone                    | 2-Acetylpyrrole                                  | ACTLPYROLE    | 1072-83-9  | C6H7NO  | Nitrogen<br>(Pyrrole)          |
| 133 | 70,504 | 124; 123;<br>95   | 124 | 91 | MS     | furan-2,5-dicarbaldehyde                      | 2,5-Furandicarboxaldehyde                        | FUR25DIAL     | 823-82-5   | C6H4O3  | Furan<br>(Aldehyde)            |
| 134 | 70,953 | 112; 55;<br>84    | 112 | 80 | MS     | 3H-pyran-2,6-dione                            | 2H-Pyran-2,6(3H)-Dione                           | PYR26DIONE    | 5926-95-4  | C5H4O3  | Pyran                          |
| 135 | 71,427 | 95; 126;<br>67    | 95  | 84 | MS     | 1,3-bis(furan-2-yl)-1,3-dihydroxypropan-2-one | 1-(2-Furanyl)-2-Hydroxy-Ethanone                 | H2FURYLONE    | 17678-19-2 | C6H6O3  | Furan (Ketone)                 |
| 136 | 71,638 | 94; 66; 65        | 94  | 89 | RS; MS | phenol                                        | Phenol                                           | PHEOL         | 108-95-2   | C6H6O   | Phenol                         |
| 137 | 72,019 | 95; 94; 66        | 95  | 84 | MS     | 1H-pyrrole-2-carbaldehyde                     | 1H-Pyrrole-2-Carboxaldehyde                      | PYRLE2AL      | 1003-29-8  | C5H5NO  | Nitrogen<br>(Pyrrole)          |
| 138 | 72,070 | 126; 69;<br>85    | 126 | 79 | MS     | benzene-1,3,5-triol                           | Phloroglucinol                                   | PHLOGLNOL     | 108-73-6   | C6H6O3  | Phenol                         |
| 139 | 72,219 | 43; 57;<br>128    | 43  | 91 | MS     | 4-hydroxy-2,5-dimethylfuran-3-one             | Furaneol                                         | FUREOL        | 3658-77-3  | C6H8O3  | Furan (Ketone)                 |
| 140 | 72,823 | 60; 73; 43        | 60  | 84 | RS; MS | octanoic acid                                 | Octanoic Acid                                    | OCTOIC        | 124-07-2   | C8H16O2 | Carboxylic<br>Acid             |
| 141 | 73,300 | 85; 43; 57        | 85  | 78 | MS     | 5-acetyloxolan-2-one                          | 5-Acetyl-Dihydro-2(3H)-Furanone                  | ACYLDHFURONE  | 29393-32-6 | C6H8O3  | Furan<br>(Lactone)             |
| 142 | 73,838 | 81; 140;<br>53    | 81  | 80 | MS     | 3-(furan-2-yl)propanoic acid                  | 2-Furanpropionic Acid                            | FURPPIONIC    | 935-13-7   | C7H8O3  | Furan (Acid)                   |
| 143 | 74,038 | 31; 43; 42;<br>60 | 31  | 83 | MS     | 1,3-dihydroxypropan-2-one                     | 1,3-Dihydroxy-2-Propanone                        | DHYPPAONE     | 96-26-4    | C3H6O3  | Ketone<br>(Alcohol)            |
| 144 | 74,258 | 85; 43; 41        | 85  | 82 | MS     | [(2S,5R)-5-methyloxolan-2-yl]methanol         | Tetrahydro-5-Methyl-2-Furanmethanol              | TEHYMFUROL    | 6126-49-4  | C6H12O2 | Furan<br>(Alcohol)             |
| 145 | 74,965 | 43; 55;<br>114    | 55  | 79 | MS     | 4,5-dimethyl-1,3-dioxol-2-one                 | 4,5-Dimethyl Cyclic Vinylene Ester Carbonic Acid | DM45CVYLESTCA | 37830-90-3 | C5H6O3  | Ester (Ketone)                 |
| 146 | 76,832 | 57; 58; 44        | 57  | 83 | MS     | 3-hydroxyoxolan-2-one                         | 2-Hydroxy-Dihydro-2(3H)-Furanone                 | HY2DHFURONE   | 19444-84-9 | C4H6O3  | Furan<br>(Lactone)             |
| 147 | 77,493 | 126; 43;<br>79    | 126 | 87 | MS     | (5-formylfuran-2-yl)methyl acetate            | 5-Acetoxymethyl-2-Furfural A                     | ACTYMFURALA   | 10551-58-3 | C8H8O4  | Furan<br>(Aldehyde /<br>Ether) |

|     |        |                 |     |    |        |                                                                       |                                               |               |                |          |                                 |
|-----|--------|-----------------|-----|----|--------|-----------------------------------------------------------------------|-----------------------------------------------|---------------|----------------|----------|---------------------------------|
| 148 | 77,713 | 126; 43;<br>79  | 126 | 90 | MS     | (5-formylfuran-2-yl)methyl acetate                                    | 5-Acetoxymethyl-2-Furfural<br>B               | ACTYMFURALB   | 10551-58-<br>3 | C8H8O4   | Furan<br>(Aldehyde /<br>Ether)  |
| 149 | 77,842 | 135; 150;<br>77 | 135 | 86 | MS     | 4-ethenyl-2-methoxyphenol                                             | 2-Methoxy-4-Vinyl-Phenol                      | MXY2VYL4PHEOL | 7786-61-0      | C9H10O2  | Phenol (Ether)                  |
| 150 | 78,094 | 56; 114;<br>42  | 56  | 82 | MS     | 3-methyloxolane-2,4-dione                                             | 3-Methyl-2,4(3H,5H)-<br>Furandione            | M3FURDIONE    | 616-02-4       | C5H4O3   | Furan<br>(Lactone)              |
| 151 | 79,890 | 43; 42;<br>144  | 43  | 94 | MS     | 3,5-dihydroxy-6-methyl-2,3-<br>dihdropyran-4-one                      | 3-Hydroxy-2,3-Dihydro-<br>Maltol              | HX3DH23MALTOL | 28564-83-<br>2 | C6H8O4   | Pyran (Alcohol<br>/ Ether)      |
| 152 | 80,260 | 60; 73; 41      | 60  | 91 | RS; MS | decanoic acid                                                         | Decanoic Acid                                 | DECOIC        | 334-48-5       | C10H20O2 | Carboxylic<br>Acid              |
| 153 | 80,469 | 142; 43;<br>68  | 142 | 83 | MS     | 3,5-dihydroxy-2-methylpyran-4-one                                     | 5-Hydroxy-Maltol                              | HX5MALTOL     | 1073-96-7      | C6H6O4   | Pyran (Ether)                   |
| 154 | 83,557 | 120; 91;<br>119 | 120 | 82 | MS     | 2,3-dihydro-1-benzofuran                                              | 2,3-Dihydro-Benzofuran                        | DHBNZFUR      | 496-16-2       | C8H8O    | Benzofuran                      |
| 155 | 83,819 | 69; 57; 41      | 69  | 97 | MS     | (1R,3R,6R,7R,9R)-2,5,8-<br>Trioxatricyclo[4.2.1.0~3,7~]nonan-<br>9-ol | 1,4:3,6-Dianhydro-.alpha.-d-<br>Glucopyranose | GLUPYROSE     | 4451-31-4      | C6H8O4   | Pyran<br>(Derivative)           |
| 156 | 84,222 | 95; 39; 68      | 95  | 90 | MS     | 1H-pyridin-4-one                                                      | 4-Pyridinol                                   | PYRDINOL      | 626-64-2       | C5H5NO   | Nitrogen                        |
| 157 | 84,511 | 109; 80;<br>53  | 109 | 80 | MS     | 4-aminophenol                                                         | 4-Amino-Phenol                                | AMIPHEOL      | 123-30-8       | C6H7NO   | Phenol<br>(Amine)               |
| 158 | 85,024 | 105; 122;<br>77 | 105 | 95 | RS; MS | benzoic acid                                                          | Benzoic Acid                                  | BNZOIC        | 65-85-0        | C7H6O2   | Benzene (Acid)                  |
| 159 | 85,202 | 55; 84;<br>128  | 55  | 78 | MS     | N-methyl-N-(pentan-3-<br>ylideneamino)methanamine                     | Dimethylhydrazone 3-<br>Pentanone             | DMHDZPTONE    | 16795-73-<br>6 | C7H16N2  | Nitrogen<br>(Amine)             |
| 160 | 85,552 | 60; 73; 43      | 60  | 82 | RS; MS | undecanoic acid                                                       | Undecanoic Acid                               | UNDECOIC      | 112-37-8       | C11H22O2 | Carboxylic<br>Acid              |
| 161 | 86,034 | 85; 86; 57      | 85  | 91 | MS     | 5-(hydroxymethyl)oxolan-2-one                                         | 5-(Hydroxymethyl)-Dihydro-<br>2(3H)-Furanone  | HM5FURONE     | 10374-51-<br>3 | C5H8O3   | Furan<br>(Lactone)              |
| 162 | 86,481 | 60; 73; 43      | 60  | 82 | RS; MS | dodecanoic acid                                                       | Dodecanoic Acid                               | DODECOIC      | 143-07-7       | C12H24O2 | Carboxylic<br>Acid              |
| 163 | 86,680 | 97; 126;<br>41  | 97  | 98 | RS; MS | 5-(hydroxymethyl)furan-2-<br>carbaldehyde                             | 5-(Hydroxymethyl)-2-<br>Furfural              | HM5FURAL      | 67-47-0        | C6H6O3   | Furan<br>(Aldehyde)             |
| 164 | 87,210 | 140; 125;<br>97 | 140 | 80 | MS     | 3-methoxybenzene-1,2-diol                                             | 3-Methoxy-1,2-Benzenediol                     | M3BNZDIOL     | 934-00-9       | C7H8O3   | Benzene<br>(Alcohol /<br>Ether) |
| 165 | 89,065 | 97; 41;<br>128  | 97  | 84 | MS     | 1-(furan-2-yl)ethane-1,2-diol                                         | 1-(2-Furanyl)-1,2-Ethanediol                  | FURYLETDIOL   | 19377-75-<br>4 | C6H8O3   | Furan<br>(Alcohol)              |
| 166 | 89,906 | 44; 74;<br>102  | 44  | 82 | MS     | 4-hydroxyoxolan-2-one                                                 | 4-Hydroxy-Dihydro-2(3H)-<br>Furanone          | DHYHYFURONE   | 5469-16-9      | C4H6O    | Furan<br>(Lactone)              |

<sup>a</sup>RT - Retention Time in minutes.

<sup>b</sup>TI - Target Ion.

<sup>c</sup>MP - Match Percent.

<sup>d</sup>ID - Identification type method used: RS (identified by Reference Standard) and MS (tentatively identified by NIST14 Mass Spectral Library).

| ID Number | RT (min) | m/z         | Target Ion | Match Percent (%) | IUPAC Name             | NIST Database Name     | Abbreviations | CAS Number | Molecular Formula | Main Chemical Class |
|-----------|----------|-------------|------------|-------------------|------------------------|------------------------|---------------|------------|-------------------|---------------------|
| 1         | 4.253    | 43; 42; 41  | 43         | 86                | pentane                | Pentane                | PTANE         | 109-66-0   | C5H12             | Hydrocarbon         |
| 2         | 4.518    | 57; 41; 56  | 57         | 84                | hexane                 | Hexane                 | HXANE         | 110-54-3   | C6H14             | Hydrocarbon         |
| 3         | 4.586    | 67; 68; 53  | 67         | 90                | penta-1,4-diene        | 1,4-Pentadiene         | PT14DIENE     | 591-93-5   | C5H8              | Hydrocarbon         |
| 4         | 4.709    | 47; 48; 45  | 47         | 87                | methanethiol           | Methanethiol           | METHIOL       | 74-93-1    | CH4S              | Sulfur              |
| 5         | 4.903    | 44; 43; 42  | 44         | 88                | acetaldehyde           | Ethanal                | ETAL          | 75-07-0    | C2H4O             | Aldehyde            |
| 6         | 5.282    | 47; 62; 45  | 47         | 97                | methylsulfanylmethane  | Dimethyl Sulfide       | DMSULFI       | 75-18-3    | C2H6S             | Sulfur              |
| 7         | 5.713    | 58; 57; 59  | 58         | 79                | propanal               | Propanal               | PPAL          | 123-38-6   | C3H6O             | Aldehyde            |
| 8         | 5.830    | 68; 39; 40  | 68         | 91                | furan                  | Furan                  | FUR           | 110-00-9   | C4H4O             | Furan               |
| 9         | 6.041    | 43; 41; 72  | 72         | 86                | 2-methylpropanal       | 2-Methyl-Propanal      | MPPAL         | 78-84-2    | C4H8O             | Aldehyde            |
| 10        | 6.255    | 31; 45; 74  | 31         | 80                | ethyl formate          | Ethyl Formate          | EESTFA        | 109-94-4   | C3H6O2            | Ester               |
| 11        | 6.632    | 56; 55; 37  | 56         | 78                | prop-2-enal            | 2-Propenal             | PPENAL        | 107-02-8   | C3H4O             | Aldehyde            |
| 12        | 7.199    | 82; 53; 81  | 82         | 94                | 2-methylfuran          | 2-Methyl-Furan         | M2FUR         | 534-22-5   | C5H6O             | Furan               |
| 13        | 7.591    | 43; 61; 70  | 43         | 90                | ethyl acetate          | Ethyl Acetate          | EESTAA        | 141-78-6   | C4H8O2            | Ester               |
| 14        | 7.906    | 43; 72; 57  | 72         | 78                | butan-2-one            | 2-Butanone             | BT2ONE        | 78-93-3    | C4H8O             | Ketone              |
| 15        | 8.338    | 57; 41; 58  | 57         | 86                | 2-methylbutanal        | 2-Methyl-Butanal       | M2BTAL        | 96-17-3    | C5H10O            | Aldehyde            |
| 16        | 8.494    | 44; 41; 43  | 41         | 93                | 3-methylbutanal        | 3-Methyl-Butanal       | M3BTAL        | 590-86-3   | C5H10O            | Aldehyde            |
| 17        | 8.946    | 31; 45; 46  | 31         | 78                | ethanol                | Ethanol                | ETOL          | 64-17-5    | C2H6O             | Alcohol             |
| 18        | 9.379    | 78; 77; 52  | 78         | 83                | Benzene                | Benzene                | BNZ           | 71-43-2    | C6H6              | Benzene             |
| 19        | 9.569    | 55; 43; 70  | 55         | 80                | but-3-en-2-one         | 3-Buten-2-one          | BT3ONE        | 78-94-4    | C4H6O             | Ketone              |
| 20        | 10.058   | 96; 95; 43  | 96         | 94                | 2,5-dimethylfuran      | 2,5-Dimethyl-Furan     | DM25FUR       | 625-86-5   | C6H8O             | Furan               |
| 21        | 10.190   | 57; 75; 102 | 57         | 82                | ethyl propanoate       | Ethyl Propanoate       | EESTPA        | 105-37-3   | C5H10O2           | Ester               |
| 22        | 11.412   | 43; 86; 41  | 86         | 80                | butane-2,3-dione       | 2,3-Butanedione        | BT23DONE      | 431-03-8   | C4H6O2            | Ketone              |
| 23        | 12.557   | 43; 56; 73  | 56         | 82                | 2-methylpropyl acetate | 2-Methylpropyl Acetate | MP2ESTAA      | 110-19-0   | C6H12O2           | Ester               |
| 24        | 14.801   | 31; 59; 42  | 31         | 80                | propan-1-ol            | 1-Propanol             | P1POL         | 71-23-8    | C3H8O             | Alcohol             |
| 25        | 14.903   | 95; 110; 43 | 95         | 86                | 2-ethyl-5-methylfuran  | 2-Ethyl-5-Methyl-Furan | E2M5FUR       | 1703-52-2  | C7H10O            | Furan               |
| 26        | 15.111   | 91; 92; 65  | 91         | 94                | toluene                | Toluene                | TOLNE         | 108-88-3   | C7H8              | Benzene             |

|    |        |               |     |    |                                   |                                 |             |            |         |                  |
|----|--------|---------------|-----|----|-----------------------------------|---------------------------------|-------------|------------|---------|------------------|
| 27 | 15.268 | 43; 71; 88    | 88  | 84 | ethyl butanoate                   | Ethyl Butanoate                 | EESTBA      | 105-54-4   | C6H12O2 | Ester            |
| 28 | 15.327 | 71; 43; 59    | 71  | 78 | 2-methylbut-3-en-2-ol             | 2-Methyl-3-Buten-2-ol           | M3BT2OL     | 115-18-4   | C5H10O  | Alcohol          |
| 29 | 16.166 | 101; 55; 73   | 101 | 82 | nonomethyl succinate              | Nonomethyl Succinate            | METESTBA    | 3878-55-5  | C5H8O4  | Ester            |
| 30 | 17.382 | 43; 57; 100   | 57  | 83 | pentane-2,3-dione                 | 2,3-Pentanedione                | PTDONE      | 600-14-6   | C5H8O2  | Ketone           |
| 31 | 18.081 | 94; 45; 79    | 94  | 90 | (methyldisulfanyl)methane         | Dimethyl Disulfide              | DMDSFD      | 624-92-0   | C2H6S2  | Sulfur           |
| 32 | 18.284 | 94; 65; 39    | 94  | 78 | 2-ethenylfuran                    | 2-Ethenyl-Furan                 | ENYL2FUR    | 1487-18-9  | C6H6O   | Furan            |
| 33 | 18.723 | 81; 99; 55    | 81  | 83 | 2,5-diethyloxolane                | 2,5-Diethyltetrahydro-Furan     | DE25TTHYFUR | 41239-48-9 | C8H16O  | Furan            |
| 34 | 18.905 | 44; 56; 43    | 44  | 94 | hexanal                           | Hexanal                         | HXAL        | 66-25-1    | C6H12O  | Aldehyde         |
| 35 | 21.231 | 43; 42; 41    | 43  | 90 | 2-methylpropan-1-ol               | 2-Methyl-1-Propanol             | M2PP1OL     | 78-83-1    | C4H10O  | Alcohol          |
| 36 | 25.551 | 85; 41; 56    | 85  | 80 | 5-butyloxolan-2-one               | 5-Butyl-Dihydro-2(3H)-Furanone  | BDH2FURONE  | 104-50-7   | C8H14O2 | Furan            |
| 37 | 27.262 | 108; 107; 77  | 108 | 80 | 3-methylphenol                    | m-Cresol                        | MCREOL      | 108-39-4   | C7H8O   | Phenol           |
| 38 | 27.966 | 56; 31; 41    | 56  | 80 | butan-1-ol                        | 1-Butanol                       | BT1OL       | 71-36-3    | C4H10O  | Alcohol          |
| 39 | 28.085 | 85; 56; 41    | 85  | 82 | 5-propyloxolan-2-one              | 5-Propyl-Dihydro-2(3H)-Furanone | PDH2FURONE  | 105-21-5   | C7H12O2 | Furan            |
| 40 | 29.054 | 94; 39; 65    | 94  | 87 | 3-methylpyridazine                | 3-Methyl-Pyridazine             | M3PYRDZNE   | 1632-76-4  | C5H6N2  | Nitrogen         |
| 41 | 29.851 | 43; 58; 71    | 58  | 91 | heptan-2-one                      | 2-Heptanone                     | HPT2ONE     | 110-43-0   | C7H14O  | Ketone           |
| 42 | 32.080 | 95; 138; 67   | 95  | 85 | 1-methyl-3-propan-2-ylcyclohexane | m-Menthane                      | MMTHANE     | 16580-24-8 | C10H20  | Terpenoid        |
| 43 | 32.436 | 80; 53; 52    | 80  | 80 | pyrimidine                        | 1,3-Diazine                     | D13ZINE     | 289-95-2   | C4H4N2  | Nitrogen         |
| 44 | 32.630 | 57; 41; 56    | 57  | 83 | 2-methylbutan-1-ol                | 2-Methyl-1-Butanol              | M2BT1OL     | 137-32-6   | C5H12O  | Alcohol          |
| 45 | 33.174 | 82; 53; 81    | 82  | 90 | 2-propylfuran                     | 2-Propyl-Furan                  | PP2FUR      | 4229-91-8  | C7H10O  | Furan            |
| 46 | 34.163 | 88; 43; 99    | 88  | 83 | ethyl hexanoate                   | Ethyl Hexanoate                 | EESTHA      | 123-66-0   | C8H16O2 | Ester            |
| 47 | 34.394 | 81; 82; 138   | 81  | 94 | 2-pentylfuran                     | 2-Pentyl-Furan                  | PT2FUR      | 3777-69-3  | C9H14O  | Furan            |
| 48 | 36.565 | 94; 67; 53    | 94  | 81 | 2-methylpyrazine                  | 2-Methyl-Pyrazine               | MPYZNE      | 109-08-0   | C5H6N   | Nitrogen         |
| 49 | 37.622 | 43; 72; 100   | 72  | 91 | 2-methyloxolan-3-one              | 2-Methyl-Dihydro-2(3H)-Furanone | MDH2FURONE  | 3188-00-9  | C5H8O2  | Furan            |
| 50 | 37.261 | 119; 134; 91  | 119 | 84 | 1-methyl-4-propan-2-ylbenzene     | p-Cymene                        | PCYMNE      | 99-87-6    | C10H14  | Terpenoid        |
| 51 | 37.369 | 105; 120; 77  | 105 | 95 | 1,3,5-trimethylbenzene            | Mesitylene                      | MESTLNE     | 108-67-8   | C9H12   | Benzene          |
| 52 | 38.007 | 122; 107; 121 | 122 | 80 | 3,5-dimethylphenol                | 3,5-Xylenol                     | XYL35NOL    | 108-68-9   | C8H10O  | Phenol           |
| 53 | 38.238 | 45; 43; 88    | 45  | 90 | 3-hydroxybutan-2-one              | 3-Hydroxy-2-Butanone            | HXY3BT2ONE  | 513-86-0   | C4H8O2  | Ketone (Alcohol) |
| 54 | 38.261 | 86; 42; 58    | 86  | 82 | 1,3-dioxol-2-one                  | Vinylene Carbonate              | VYLESTCA    | 96-49-1    | C3H4O3  | Ester (Ketone)   |
| 55 | 38.738 | 122; 107; 121 | 122 | 82 | 2,6-dimethylphenol                | 2,6-Xylenol                     | XYL26NOL    | 576-26-1   | C8H10O  | Phenol           |

|    |        |                  |     |    |                                               |                                                 |              |            |          |                      |
|----|--------|------------------|-----|----|-----------------------------------------------|-------------------------------------------------|--------------|------------|----------|----------------------|
| 56 | 39.324 | 43; 31; 74       | 43  | 90 | 1-hydroxypropan-2-one                         | 1-Hydroxy-2-Propanone                           | HXY1PP2ONE   | 116-09-6   | C3H6O2   | Ketone<br>(Alcohol)  |
| 57 | 40.500 | 108; 42; 40      | 108 | 80 | 2,5-dimethylpyrazine                          | 2,5-Dimethyl-Pyrazine                           | DM25PYZNE    | 123-32-0   | C6H8N2   | Nitrogen             |
| 58 | 40.910 | 108; 42; 40      | 108 | 90 | 2,6-dimethylpyrazine                          | 2,6-Dimethyl-Pyrazine                           | DM26PYZNE    | 108-50-9   | C6H8N2   | Nitrogen             |
| 59 | 42.422 | 82; 39; 54       | 82  | 91 | cyclopent-2-en-1-one                          | 2-Cyclopenten-1-one                             | CY2PT1EONE   | 930-30-3   | C5H6O    | Ketone               |
| 60 | 41.788 | 159; 174;<br>144 | 159 | 82 | 1,2,3,4-tetramethyl-5-prop-1-en-2-ylbenzene   | 1,2,3,4-Tetramethyl-4-(1-methylethenyl)-Benzene | TM4MEYL1BNZ  | 61142-76-5 | C13H20   | Benzene              |
| 61 | 43.239 | 67; 96; 53       | 67  | 83 | 2-methylcyclopent-2-en-1-one                  | 2-Methyl-2-Cyclopenten-1-one                    | M2CY2PT1EONE | 1120-73-6  | C6H8O    | Ketone               |
| 62 | 43.444 | 95; 43; 96       | 95  | 80 | (5-methylfuran-2-yl)methanethiol              | 5-Methyl-2-Furanmethanethiol                    | M2FURTHOL    | 59303-05-8 | C6H8OS   | Furan (Sulfur)       |
| 63 | 43.682 | 57; 88; 56       | 57  | 79 | 1-hydroxybutan-2-one                          | 1-Hydroxy-2-Butanone                            | H1BT2ONE     | 5077-67-8  | C4H8O2   | Ketone<br>(Alcohol)  |
| 64 | 44.389 | 121; 122;<br>39  | 121 | 80 | 2-ethyl-6-methylpyrazine                      | 2-Ethyl-6-Methyl-Pyrazine                       | E6MPYZNE     | 13925-03-6 | C7H10N2  | Nitrogen             |
| 65 | 44.691 | 121; 122;<br>39  | 121 | 77 | 2-ethyl-5-methylpyrazine                      | 2-Ethyl-5-Methyl-Pyrazine                       | E5MPYZNE     | 13360-64-0 | C7H10N2  | Nitrogen             |
| 66 | 45.234 | 57; 41; 43       | 57  | 93 | nonanal                                       | Nonanal                                         | NONAL        | 124-19-6   | C9H18O   | Aldehyde             |
| 67 | 45.745 | 42; 122; 81      | 122 | 78 | 2,3,5-trimethylpyrazine                       | Trimethyl-Pyrazine                              | TMPYZNE      | 14667-55-1 | C7H10N2  | Nitrogen             |
| 68 | 45.956 | 67; 95; 124      | 67  | 81 | (3E)-3-ethyl-2-methylhexa-1,3-diene           | 3-Ethyl-2-Methyl-1,3-Hexadiene                  | E3M2HX13DENE | 61142-36-7 | C9H16    | Terpene              |
| 69 | 46.726 | 68; 96; 40       | 68  | 82 | cyclohex-2-en-1-one                           | 2-Cyclohexen-1-one                              | C2HEXONE     | 930-68-7   | C6H8O    | Ketone               |
| 70 | 46.901 | 55; 43; 98       | 55  | 87 | 2-methyl-2H-furan-5-one                       | 5-Methyl-2(3H)-Furanone                         | M5FURONE     | 591-12-8   | C5H6O2   | Furan                |
| 71 | 47.214 | 98; 42; 69       | 98  | 84 | 4-methyl-1,3-dihydroimidazol-2-one            | 1,3-Dihydro-4-Methyl-2H-Imidazol-2-one          | M4IMDZONE    | 214-751-9  | C4H6N2O  | Nitrogen<br>(Ketone) |
| 72 | 47.569 | 88; 101; 57      | 88  | 89 | ethyl octanoate                               | Ethyl Octanoate                                 | EESTOA       | 106-32-1   | C10H20O2 | Ester                |
| 73 | 47.861 | 159; 174;<br>131 | 159 | 94 | 1,2,3,4-tetrahydro-1,1,6-trimethylnaphthalene | 1,2,3,4-Tetrahydro-1,1,6-Trimethyl-Naphthalene  | T116TNP      | 475-03-6   | C13H18   | Naphthalene          |
| 74 | 48.559 | 96; 95; 39       | 96  | 96 | 2-furaldehyde                                 | Furfural                                        | FURAL        | 98-01-1    | C5H4O2   | Furan<br>(Aldehyde)  |
| 75 | 49.502 | 43; 45; 60       | 43  | 90 | Acetic Acid                                   | Ethanoic Acid                                   | ETNOIC       | 64-19-7    | C2H4O2   | Carboxylic<br>Acid   |
| 76 | 49.783 | 159; 174;<br>131 | 159 | 96 | 1,2,3,4-tetrahydro-1,6,8-trimethylnaphthalene | 1,2,3,4-Tetrahydro-1,6,8-Trimethyl-Naphthalene  | T168TNP      | 30316-36-0 | C13H18   | Naphthalene          |
| 77 | 50.004 | 57; 41; 55       | 57  | 82 | 2-ethylhexan-1-ol                             | 2-Ethyl-1-Hexanol                               | E2HX1OL      | 104-76-7   | C8H18O   | Alcohol              |
| 78 | 50.131 | 110; 109;<br>53  | 110 | 92 | 3-methyl-2-furaldehyde                        | 3-Methyl-Furfural                               | M3FURAL      | 33342-48-2 | C6H6O2   | Furan<br>(Aldehyde)  |
| 79 | 50.259 | 81; 53; 126      | 81  | 82 | furan-2-ylmethyl formate                      | Furfuryl Formate                                | FURYLFMTE    | 13493-97-5 | C6H6O3   | Furan (Ester)        |
| 80 | 50.655 | 57; 43; 55       | 57  | 93 | decanal                                       | Decanal                                         | DECAL        | 112-31-2   | C10H2O   | Aldehyde             |
| 81 | 50.895 | 95; 110; 39      | 95  | 91 | 1-(furan-2-yl)ethanone                        | 1-(2-Furanyl)-Ethanone                          | FURYLONE     | 1192-62-7  | C6H6O2   | Furan (Ketone)       |

|     |        |                  |     |    |                                                   |                                                    |              |            |          |                       |
|-----|--------|------------------|-----|----|---------------------------------------------------|----------------------------------------------------|--------------|------------|----------|-----------------------|
| 82  | 51.329 | 106; 105;<br>77  | 106 | 95 | benzaldehyde                                      | Benzaldehyde                                       | BENZAL       | 100-52-7   | C7H6O    | Benzene<br>(Aldehyde) |
| 83  | 51.771 | 81; 98; 52       | 81  | 95 | furan-2-ylmethyl acetate                          | Furfuryl Acetate                                   | FURYLACTE    | 623-17-6   | C7H8O3   | Furan (Ester)         |
| 84  | 52.336 | 74; 45; 73       | 74  | 90 | propanoic acid                                    | Propanoic Acid                                     | PPANOIC      | 79-09-4    | C3H6O2   | Carboxylic<br>Acid    |
| 85  | 53.078 | 63; 78; 45       | 63  | 91 | methylsulfinylmethane                             | Dimethyl Sulfoxide                                 | DMSULFO      | 67-68-5    | C2H6OS   | Sulfur                |
| 86  | 53.245 | 159; 174;<br>131 | 159 | 94 | 1,2,3,4-tetrahydro-1,5,8-<br>trimethylnaphthalene | 1,2,3,4-Tetrahydro-1,5,8-<br>Trimethyl-Naphthalene | T158TNP      | 21693-51-6 | C13H18   | Naphthalene           |
| 87  | 53.657 | 110; 109;<br>53  | 110 | 94 | 5-methyl-2-furaldehyde                            | 5-Methyl-Furfural                                  | M5FURAL      | 620-02-0   | C6H6O2   | Furan<br>(Aldehyde)   |
| 88  | 54.207 | 96; 42; 68       | 96  | 91 | cyclopent-4-ene-1,3-dione                         | 4-Cyclopentene-1,3-dione                           | CPT4E13DONE  | 930-60-9   | C5H4O2   | Ketone                |
| 89  | 54.861 | 131; 132;<br>103 | 131 | 97 | 2-methyl-1-benzofuran                             | 2-Methyl-Benzofuran                                | M2BNZFUR     | 4265-25-2  | C9H8O    | Benzofuran            |
| 90  | 55.678 | 109; 124;<br>81  | 109 | 80 | 1-(5-methylfuran-2-yl)ethanone                    | 1-(5-Methyl-2-Furanyl)-<br>Ethanone                | M5FURLONE    | 1193-79-9  | C7H8O2   | Furan (Ketone)        |
| 91  | 55.835 | 45; 59; 72       | 45  | 90 | 2-(2-ethoxyethoxy)ethanol                         | Diethylene Glycol Ethyl<br>Ether                   | DENGOLEETHR  | 111-90-0   | C6H14O3  | Ether (Alcohol)       |
| 92  | 56.251 | 42; 41; 56       | 42  | 82 | 3-methyloxolan-3-one                              | 3-Methyl-Dihydro-2(3H)-<br>Furanone                | M3DHFURONE   | 1679-47-6  | C5H8O2   | Furan<br>(Lactone)    |
| 93  | 56.693 | 159; 174;<br>128 | 159 | 86 | 3,3,5,7-tetramethyl-1,2-<br>dihydroindene         | 2,3-Dihydro-1,1,4,6-<br>Tetramethyl-1H-Indene      | DHT1146MIDNE | 941-60-6   | C13H18   | Indene                |
| 94  | 57.065 | 91; 92; 120      | 91  | 90 | 2-phenylacetaldehyde                              | Benzeneacetaldehyde                                | BENZACETAL   | 122-78-1   | C8H8O    | Benzene<br>(Aldehyde) |
| 95  | 57.117 | 69; 41; 112      | 91  | 87 | 2,4-dimethyl-2H-furan-5-one                       | 3,5-Dimethyl-Dihydro-2-<br>Furanone                | DM35DHFURONE | 5584-69-0  | C6H8O2   | Furan<br>(Lactone)    |
| 96  | 57.323 | 72; 55; 45       | 72  | 78 | prop-2-enoic acid                                 | 2-Propenoic Acid                                   | PPE2NOIC     | 79-10-7    | C3H4O2   | Carboxylic<br>Acid    |
| 97  | 57.337 | 88; 101; 73      | 88  | 89 | ethyl decanoate                                   | Ethyl Decanoate                                    | EESTDA       | 110-38-3   | C12H24O2 | Ester                 |
| 98  | 57.354 | 105; 77; 51      | 105 | 87 | 1-phenylethanone                                  | Acetophenone                                       | ACETPHONE    | 98-86-2    | C8H8O    | Benzene<br>(Ketone)   |
| 99  | 57.744 | 98; 41; 81       | 98  | 98 | furan-2-ylmethanol                                | 2-Furanmethanol                                    | FUR2OL       | 98-00-0    | C5H6O2   | Furan<br>(Alcohol)    |
| 100 | 57.981 | 98; 41; 97       | 97  | 93 | furan-3-ylmethanol                                | 3-Furanmethanol                                    | FUR3OL       | 4412-91-3  | C5H6O2   | Furan<br>(Alcohol)    |
| 101 | 58.675 | 159; 128;<br>144 | 159 | 86 | 3,3,5,6-tetramethyl-1,2-<br>dihydroindene         | 2,3-Dihydro-1,1,5,6-<br>Tetramethyl-1H-Indene      | DHT1156MIDNE | 942-43-8   | C13H18   | Indene                |
| 102 | 58.897 | 162; 91; 43      | 162 | 91 | 2-(2-furylmethyl)-5-methylfuran                   | 2-(2-Furanylmethyl)-5-<br>Methyl-Furan             | FURLYMFUR    | 13678-51-8 | C10H10O2 | Furan                 |
| 103 | 60.229 | 41; 69; 98       | 41  | 83 | 4-methyl-2H-furan-5-one                           | 3-Methyl-2(5H)-Furanone                            | M3FURONE     | 22122-36-7 | C5H6O2   | Furan<br>(Lactone)    |
| 104 | 60.456 | 95; 112; 43      | 95  | 93 | (5-methylfuran-2-yl)methanol                      | 5-Methyl-2-Furanmethanol                           | M5FUR2OL     | 3857-25-8  | C6H8O2   | Furan<br>(Alcohol)    |
| 105 | 60.947 | 108; 91; 90      | 108 | 75 | benzyl acetate                                    | Benzyl Acetate                                     | PMESTAA      | 140-11-4   | C9H10O2  | Benzene<br>(Ester)    |

|     |        |              |     |    |                                                          |                                       |              |            |          |                    |
|-----|--------|--------------|-----|----|----------------------------------------------------------|---------------------------------------|--------------|------------|----------|--------------------|
| 106 | 61.749 | 55; 84; 54   | 55  | 80 | 2H-furan-5-one                                           | 2(5H)-Furanone                        | FURONE       | 497-23-4   | C4H4O2   | Furan (Lactone)    |
| 107 | 62.073 | 176; 43; 161 | 176 | 96 | 2-methyl-5-[(5-methylfuran-2-yl)methyl]furan             | 2,2'-Methylenebis[5-Methyl-Furan      | MNEB5MFUR    | 13679-43-1 | C10H10O2 | Furan              |
| 108 | 62.421 | 98; 55; 42   | 98  | 90 | cyclopentane-1,2-dione                                   | 1,2-Cyclopentanedione                 | CPT12DONE    | 3008-40-0  | C5H6O2   | Ketone             |
| 109 | 63.971 | 70; 39; 41   | 70  | 84 | cyclohex-2-en-1-ol                                       | 2-Cyclohexenol                        | CHEX2E1OL    | 822-67-3   | C6H10O   | Alcohol            |
| 110 | 64.539 | 104; 43; 91  | 104 | 84 | 2-phenylethyl acetate                                    | 2-Phenylethyl Acetate                 | PEESTAA      | 103-45-7   | C10H12O2 | Benzene (Ester)    |
| 111 | 64.803 | 112; 69; 41  | 112 | 93 | 3-methylcyclopentane-1,2-dione                           | 3-Methyl-1,2-Cyclopentanedione        | M3CPT12DONE  | 765-70-8   | C6H8O2   | Ketone             |
| 112 | 64.824 | 73; 88; 41   | 73  | 89 | 2-ethylhexanoic acid                                     | 2-Ethyl-Hexanoic Acid                 | E2HXNOIC     | 149-57-5   | C8H16O2  | Carboxylic Acid    |
| 113 | 64.922 | 69; 121; 41  | 69  | 96 | 1-(2,6,6-trimethylcyclohexa-1,3-dien-1-yl)but-2-en-1-one | β-Damascenone                         | DAMSNONE     | 23726-93-4 | C13H18O  | Terpenoid (Ketone) |
| 114 | 65.265 | 88; 101; 73  | 88  | 80 | ethyl undecanoate                                        | Ethyl Undecanoate                     | EESTUNDA     | 627-90-7   | C13H26O2 | Ester              |
| 115 | 65.660 | 43; 41; 73   | 43  | 79 | 2-methylpropanoic acid                                   | 2-Methyl-Propanoic Acid               | M2PPOICA     | 79-31-2    | C4H8O2   | Carboxylic Acid    |
| 116 | 65.986 | 128; 57; 85  | 128 | 77 | 1,3-diazinane-2,4,6-trione                               | 2,4,6-Trihydroxypyrimidine            | THDXYPYMNE   | 67-52-7    | C4H4N2O3 | Nitrogen           |
| 117 | 66.118 | 109; 124, 81 | 109 | 90 | 4-methoxyphenol                                          | Mequinol                              | MEQNOL       | 150-76-5   | C7H8O2   | Phenol (Ether)     |
| 118 | 66.384 | 114; 58; 57  | 114 | 84 | 2,2-diethyl-3-methyl-1,3-oxazolidine                     | 2,2-Diethyl-3-Methyl-Oxazolidine      | DEMOXZDNE    |            | C8H17NO  | Nitrogen           |
| 119 | 66.461 | 109; 152, 52 | 109 | 82 | 1,7-dihydropyrazolo[3,4-d]pyrimidine-4,6-dione           | Oxypurinol                            | OXYPUROL     | 2465-59-0  | C5H4N4O2 | Nitrogen           |
| 120 | 66.688 | 79; 108; 77  | 79  | 92 | phenylmethanol                                           | Benzenemethanol                       | BENZMTOL     | 100-51-6   | C7H8O    | Benzene (Alcohol)  |
| 121 | 67.106 | 69; 41; 39   | 69  | 87 | 3-methyl-2H-furan-5-one                                  | 4-Methyl-2(5H)-Furanone               | M4FUR2ONE    | 6124-79-4  | C5H6O2   | Furan (Lactone)    |
| 122 | 67.293 | 126; 55; 83  | 126 | 95 | 3-ethyl-2-hydroxycyclopent-2-en-1-one                    | 3-Ethyl-2-Hydroxy-2-Cyclopenten-1-one | E3H2C2PT1ONE | 21835-01-8 | C7H10O2  | Ketone (Alcohol)   |
| 123 | 68.036 | 91; 92; 122  | 91  | 78 | 2-phenylethanol                                          | Benzeneethanol                        | BENZETOL     | 60-12-8    | C8H10O   | Benzene (Alcohol)  |
| 124 | 68.580 | 44; 71; 55   | 44  | 80 | prop-2-enamide                                           | Acrylamide                            | ACRYLMDE     | 79-06-1    | C3H5NO   | Nitrogen           |
| 125 | 68.698 | 61; 44; 43   | 61  | 79 | (2S,3R)-butane-1,2,3,4-tetrol                            | Erythritol                            | ERYTOL       | 149-32-6   | C4H10O4  | Alcohol (Polyol)   |
| 126 | 68.890 | 112; 111; 39 | 112 | 80 | 2,3-dimethyl-1H-pyrazol-5-one                            | 2,3-Dimethyl-3-Pyrazolin-5-one        | DM23PYZLONE  | 3201-28-3  | C5H8N2O  | Nitrogen           |
| 127 | 69.323 | 136; 121; 65 | 136 | 87 | (E)-4-(furan-2-yl)but-3-en-2-one                         | Furfural Acetone                      | FURALTONE    | 623-15-4   | C8H8O2   | Furan (Ketone)     |
| 128 | 69.469 | 112; 69; 55  | 112 | 85 | 2-hydroxy-3-methylcyclopent-2-en-1-one                   | Cyclotene                             | CYTENE       | 80-71-7    | C6H8O2   | Ketone (Alcohol)   |
| 129 | 69.557 | 124; 95; 107 | 124 | 80 | 2-methylbenzene-1,4-diol                                 | 2-Methyl-1,4-Benzenediol              | M2BNZ14DIOL  | 95-71-6    | C7H8O2   | Benzene (Alcohol)  |

|     |        |                |     |    |                                               |                                     |               |            |          |                          |
|-----|--------|----------------|-----|----|-----------------------------------------------|-------------------------------------|---------------|------------|----------|--------------------------|
| 130 | 69.706 | 73; 60; 41     | 73  | 77 | heptanoic Acid                                | Heptanoic Acid                      | HPTOIC        | 111-14-8   | C7H14O2  | Carboxylic Acid          |
| 131 | 69.883 | 126; 71; 43    | 126 | 95 | 3-hydroxy-2-methylpyran-4-one                 | Maltol                              | MALTOL        | 118-71-8   | C6H6O3   | Pyran                    |
| 132 | 70.149 | 94; 109; 66    | 94  | 95 | 1-(1H-pyrrol-2-yl)ethanone                    | 2-Acetylpyrrole                     | ACTLPYROLE    | 1072-83-9  | C6H7NO   | Nitrogen (Pyrrole)       |
| 133 | 70.504 | 124; 123; 95   | 124 | 91 | furan-2,5-dicarbaldehyde                      | 2,5-Furandicarboxaldehyde           | FUR25DIAL     | 823-82-5   | C6H4O3   | Furan (Aldehyde)         |
| 134 | 70.953 | 112; 55; 84    | 112 | 80 | 3H-pyran-2,6-dione                            | 2H-Pyran-2,6(3H)-Dione              | PYR26DIONE    | 5926-95-4  | C5H4O3   | Pyran                    |
| 135 | 71.427 | 95; 126; 67    | 95  | 84 | 1,3-bis(furan-2-yl)-1,3-dihydroxypropan-2-one | 1-(2-Furanyl)-2-Hydroxy-Ethanone    | H2FURYLONE    | 17678-19-2 | C6H6O3   | Furan (Ketone)           |
| 136 | 71.638 | 94; 66; 65     | 94  | 89 | phenol                                        | Phenol                              | PHEOL         | 108-95-2   | C6H6O    | Phenol                   |
| 137 | 72.019 | 95; 94; 66     | 95  | 84 | 1H-pyrrole-2-carbaldehyde                     | 1H-Pyrrole-2-Carboxaldehyde         | PYRLE2AL      | 1003-29-8  | C5H5NO   | Nitrogen (Pyrrole)       |
| 138 | 72.070 | 126; 69; 85    | 126 | 79 | benzene-1,3,5-triol                           | Phloroglucinol                      | PHLOGLNOL     | 108-73-6   | C6H6O3   | Phenol                   |
| 139 | 72.219 | 43; 57; 128    | 43  | 91 | 4-hydroxy-2,5-dimethylfuran-3-one             | Furaneol                            | FUREOL        | 3658-77-3  | C6H8O3   | Furan (Ketone)           |
| 140 | 72.823 | 60; 73; 43     | 60  | 84 | octanoic acid                                 | Octanoic Acid                       | OCTOIC        | 124-07-2   | C8H16O2  | Carboxylic Acid          |
| 141 | 73.300 | 85; 43; 57     | 85  | 78 | 5-acetyloxolan-2-one                          | 5-Acetyl-Dihydro-2(3H)-Furanone     | ACYLDHFURONE  | 29393-32-6 | C6H8O3   | Furan (Lactone)          |
| 142 | 73.838 | 81; 140; 53    | 81  | 80 | 3-(furan-2-yl)propanoic acid                  | 2-Furanpropionic Acid               | FURPPIONIC    | 935-13-7   | C7H8O3   | Furan (Acid)             |
| 143 | 74.038 | 31; 43; 42, 60 | 31  | 83 | 1,3-dihydroxypropan-2-one                     | 1,3-Dihydroxy-2-Propanone           | DHYPPAONE     | 96-26-4    | C3H6O3   | Ketone (Alcohol)         |
| 144 | 74.258 | 85; 43; 41     | 85  | 82 | [(2S,5R)-5-methyloxolan-2-yl]methanol         | Tetrahydro-5-Methyl-2-Furanmethanol | TEHYMFUROL    | 6126-49-4  | C6H12O2  | Furan (Alcohol)          |
| 145 | 74.965 | 43; 55; 114    | 55  | 79 | 4,5-dimethyl-1,3-dioxol-2-one                 | 4,5-Dimethyl Vinylene Carbonate     | DM45VYLESTCA  | 37830-90-3 | C5H6O3   | Ester (Ketone)           |
| 146 | 76.832 | 57; 58; 44     | 57  | 83 | 3-hydroxyoxolan-2-one                         | 2-Hydroxy-Dihydro-2(3H)-Furanone    | HY2DHFURONE   | 19444-84-9 | C4H6O3   | Furan (Lactone)          |
| 147 | 77.493 | 126; 43; 79    | 126 | 87 | (5-formylfuran-2-yl)methyl acetate            | 5-Acetoxymethyl-2-Furfural A        | ACTYMFURALA   | 10551-58-3 | C8H8O4   | Furan (Aldehyde / Ether) |
| 148 | 77.713 | 126; 43; 79    | 126 | 90 | (5-formylfuran-2-yl)methyl acetate            | 5-Acetoxymethyl-2-Furfural B        | ACTYMFURALB   | 10551-58-3 | C8H8O4   | Furan (Aldehyde / Ether) |
| 149 | 77.842 | 135; 150; 77   | 135 | 86 | 4-ethenyl-2-methoxyphenol                     | 2-Methoxy-4-Vinyl-Phenol            | MXY2VYL4PHEOL | 7786-61-0  | C9H10O2  | Phenol (Ether)           |
| 150 | 78.094 | 56; 114; 42    | 56  | 82 | 3-methyloxolane-2,4-dione                     | 3-Methyl-2,4(3H,5H)-Furandione      | M3FURDIONE    | 616-02-4   | C5H4O3   | Furan (Lactone)          |
| 151 | 79.890 | 43; 42; 144    | 43  | 94 | 3,5-dihydroxy-6-methyl-2,3-dihydropyran-4-one | 3-Hydroxy-2,3-Dihydro-Maltol        | HX3DH23MALTOL | 28564-83-2 | C6H8O4   | Pyran (Alcohol / Ether)  |
| 152 | 80.260 | 60; 73; 41     | 60  | 91 | decanoic acid                                 | Decanoic Acid                       | DECOIC        | 334-48-5   | C10H20O2 | Carboxylic Acid          |

|     |        |              |     |    |                                                               |                                           |             |            |          |                           |
|-----|--------|--------------|-----|----|---------------------------------------------------------------|-------------------------------------------|-------------|------------|----------|---------------------------|
| 153 | 80.469 | 142; 43; 68  | 142 | 83 | 3,5-dihydroxy-2-methylpyran-4-one                             | 5-Hydroxy-Maltol                          | HX5MALTOL   | 1073-96-7  | C6H6O4   | Pyran (Ether)             |
| 154 | 83.557 | 120; 91; 119 | 120 | 82 | 2,3-dihydro-1-benzofuran                                      | 2,3-Dihydro-Benzofuran                    | DHBNZFUR    | 496-16-2   | C8H8O    | Benzofuran                |
| 155 | 83.819 | 69; 57; 41   | 69  | 97 | (1R,3R,6R,7R,9R)-2,5,8-Trioxatricyclo[4.2.1.0~3,7~]nonan-9-ol | 1,4:3,6-Dianhydro-.alpha.-d-Glucopyranose | GLUPYROSE   | 4451-31-4  | C6H8O4   | Pyran (Derivative)        |
| 156 | 84.222 | 95; 39; 68   | 95  | 90 | 1H-pyridin-4-one                                              | 4-Pyridinol                               | PYRDINOL    | 626-64-2   | C5H5NO   | Nitrogen Phenol (Amine)   |
| 157 | 84.511 | 109; 80; 53  | 109 | 80 | 4-aminophenol                                                 | 4-Amino-Phenol                            | AMIPHEOL    | 123-30-8   | C6H7NO   |                           |
| 158 | 85.024 | 105; 122; 77 | 105 | 95 | benzoic acid                                                  | Benzoic Acid                              | BNZOIC      | 65-85-0    | C7H6O2   | Benzene (Acid)            |
| 159 | 85.202 | 55; 84; 128  | 55  | 78 | N-methyl-N-(pentan-3-ylideneamino)methanamine                 | Dimethylhydrazone 3-Pentanone             | DMHDZPTONE  | 16795-73-6 | C7H16N2  | Nitrogen (Amine)          |
| 160 | 85.552 | 60; 73; 43   | 60  | 82 | undecanoic acid                                               | Undecanoic Acid                           | UNDECOIC    | 112-37-8   | C11H22O2 | Carboxylic Acid           |
| 161 | 86.034 | 85; 86; 57   | 85  | 91 | 5-(hydroxymethyl)oxolan-2-one                                 | 5-(Hydroxymethyl)-Dihydro-2(3H)-Furanone  | HM5FURONE   | 10374-51-3 | C5H8O3   | Furan (Lactone)           |
| 162 | 86.481 | 60; 73; 43   | 60  | 82 | dodecanoic acid                                               | Dodecanoic Acid                           | DODECOIC    | 143-07-7   | C12H24O2 | Carboxylic Acid           |
| 163 | 86.680 | 97; 126; 41  | 97  | 98 | 5-(hydroxymethyl)furan-2-carbaldehyde                         | 5-(Hydroxymethyl)-2-Furfural              | HM5FURAL    | 67-47-0    | C6H6O3   | Furan (Aldehyde)          |
| 164 | 87.210 | 140; 125; 97 | 140 | 80 | 3-methoxybenzene-1,2-diol                                     | 3-Methoxy-1,2-Benzenediol                 | M3BNZDIOL   | 934-00-9   | C7H8O3   | Benzene (Alcohol / Ether) |
| 165 | 89.065 | 97; 41; 128  | 97  | 84 | 1-(furan-2-yl)ethane-1,2-diol                                 | 1-(2-Furanyl)-1,2-Ethanediol              | FURYLETDIOL | 19377-75-4 | C6H8O3   | Furan (Alcohol)           |
| 166 | 89.906 | 44; 74; 102  | 44  | 82 | 4-hydroxyoxolan-2-one                                         | 4-Hydroxy-Dihydro-2(3H)-Furanone          | DHYHYFURONE | 5469-16-9  | C4H6O    | Furan (Lactone)           |

**Table S3A.** Mean and relative standard deviation values of identified VOCs in sugarcane-based syrups samples from CERT group.

| Volatile Organic Compound | Relative Peak Areas (x 10 <sup>2</sup> ) |         |          |         |         |         |          |         |          |         |          |         |          |         |
|---------------------------|------------------------------------------|---------|----------|---------|---------|---------|----------|---------|----------|---------|----------|---------|----------|---------|
|                           | CERT                                     |         |          |         |         |         |          |         |          |         |          |         |          |         |
|                           | FRS07                                    |         | FRS13    |         | FRS14   |         | FRS15    |         | FRS16    |         | FRS17    |         | FRS18    |         |
|                           | Mean                                     | RSD (%) | Mean     | RSD (%) | Mean    | RSD (%) | Mean     | RSD (%) | Mean     | RSD (%) | Mean     | RSD (%) | Mean     | RSD (%) |
| Pentane                   | 98.7                                     | 1.3     | 28.9     | 11.0    | 21.0    | 0.8     | 19.0     | 11.8    | 52.2     | 1.8     | 47.9     | 6.2     | 60.5     | 4.4     |
| Hexane                    | 259.4                                    | 2.2     | 105.1    | 9.9     | 61.8    | 2.3     | 77.8     | 1.6     | 142.7    | 2.6     | 99.3     | 5.7     | 167.5    | 1.9     |
| 1,4-Pentadiene            | 0.0                                      |         | 0.0      |         | 0.0     |         | 0.0      |         | 0.0      |         | 0.0      |         | 0.0      |         |
| Methanethiol              | 1022.5                                   | 6.5     | 134.3    | 12.0    | 123.2   | 2.8     | 208.9    | 11.3    | 163.4    | 2.9     | 448.0    | 7.4     | 318.0    | 3.3     |
| Ethanal                   | 13128.8                                  | 6.6     | 1904.3   | 10.5    | 3153.9  | 7.1     | 3942.1   | 1.7     | 8786.9   | 3.9     | 8939.0   | 9.4     | 12257.1  | 9.3     |
| Dimethyl Sulfide          | 7542.8                                   | 8.6     | 643.3    | 10.5    | 1135.7  | 2.1     | 894.2    | 5.3     | 1378.0   | 7.3     | 2272.4   | 8.0     | 1569.8   | 6.2     |
| Propanal                  | 412.8                                    | 2.4     | 334.8    | 11.7    | 424.8   | 8.2     | 293.4    | 11.0    | 753.7    | 4.3     | 495.0    | 12.5    | 1390.6   | 11.5    |
| Furan                     | 1810.2                                   | 2.7     | 1160.9   | 6.5     | 530.8   | 1.0     | 593.1    | 1.0     | 2149.9   | 12.7    | 6029.2   | 0.2     | 4240.4   | 7.2     |
| 2-Methyl-Propanal         | 34308.8                                  | 11.7    | 8319.7   | 2.3     | 8395.9  | 5.3     | 6454.5   | 3.5     | 11410.9  | 5.8     | 17659.5  | 7.9     | 21889.5  | 8.7     |
| Ethyl Formate             | 2461.8                                   | 17.7    | 1922.9   | 2.3     | 757.1   | 14.2    | 894.4    | 5.3     | 7155.3   | 5.1     | 2667.3   | 2.1     | 0.0      |         |
| 2-Propenal                | 234.5                                    | 2.1     | 245.3    | 12.8    | 149.8   | 3.1     | 400.3    | 0.3     | 572.5    | 1.0     | 310.2    | 6.9     | 353.4    | 13.2    |
| 2-Methyl-Furan            | 5413.8                                   | 8.0     | 1691.1   | 1.3     | 701.9   | 11.0    | 708.2    | 9.7     | 2031.0   | 11.0    | 2646.0   | 10.7    | 6988.8   | 6.3     |
| Ethyl Acetate             | 7851.5                                   | 10.5    | 7412.5   | 1.4     | 5835.8  | 0.3     | 2801.0   | 5.8     | 25389.2  | 1.8     | 13187.9  | 7.0     | 280.0    | 4.6     |
| 2-Butanone                | 4215.0                                   | 9.4     | 231.7    | 13.3    | 540.0   | 9.1     | 404.9    | 3.7     | 217.2    | 12.9    | 1133.4   | 7.4     | 988.7    | 1.6     |
| 2-Methyl-Butanal          | 33453.8                                  | 15.1    | 21469.2  | 0.5     | 15687.0 | 0.7     | 12966.1  | 3.7     | 19612.8  | 1.2     | 30163.3  | 8.7     | 37630.2  | 9.5     |
| 3-Methyl-Butanal          | 26013.0                                  | 6.9     | 12150.8  | 2.8     | 7858.3  | 8.9     | 7073.4   | 9.5     | 14668.8  | 5.7     | 31870.8  | 4.7     | 41914.2  | 13.0    |
| Ethanol                   | 202215.3                                 | 7.3     | 121001.6 | 1.0     | 99323.0 | 0.3     | 107855.0 | 4.4     | 115261.9 | 3.6     | 145024.3 | 1.6     | 159606.9 | 2.9     |
| Benzene                   | 161.1                                    | 5.5     | 73.5     | 0.7     | 18.0    | 5.4     | 53.8     | 1.5     | 101.2    | 9.1     | 84.4     | 5.9     | 200.4    | 4.3     |
| 3-Buten-2-one             | 570.3                                    | 17.3    | 894.1    | 8.3     | 267.5   | 1.5     | 341.5    | 3.4     | 872.8    | 5.1     | 5111.2   | 3.4     | 5047.9   | 5.4     |
| 2,5-Dimethyl-Furan        | 515.4                                    | 6.3     | 907.0    | 2.6     | 824.3   | 10.6    | 880.9    | 6.2     | 3919.7   | 9.0     | 2021.6   | 6.6     | 1956.1   | 4.6     |
| Ethyl Propanoate          | 594.9                                    | 12.1    | 361.7    | 1.9     | 28.0    | 11.4    | 132.7    | 11.3    | 1881.4   | 4.4     | 307.1    | 8.6     | 0.0      |         |
| 2,3-Butanedione           | 31364.2                                  | 6.8     | 16140.5  | 2.6     | 1754.9  | 3.4     | 2814.3   | 7.2     | 1397.2   | 13.2    | 33123.4  | 11.0    | 49665.1  | 11.3    |
| 2-Methylpropyl Acetate    | 0.0                                      |         | 0.0      |         | 0.0     |         | 0.0      |         | 0.0      |         | 0.0      |         | 0.0      |         |
| 1-Propanol                | 17.5                                     | 7.8     | 55.0     | 13.7    | 54.5    | 1.9     | 89.0     | 2.2     | 38.8     | 13.4    | 92.1     | 7.1     | 0.0      |         |
| 2-Ethyl-5-Methyl-Furan    | 45.8                                     | 7.6     | 89.6     | 7.6     | 28.0    | 12.1    | 240.6    | 10.8    | 544.9    | 9.3     | 350.0    | 11.4    | 340.4    | 0.4     |
| Toluene                   | 2074.3                                   | 11.4    | 5078.0   | 8.1     | 4285.8  | 10.8    | 4721.7   | 9.8     | 19603.0  | 8.9     | 53948.0  | 9.8     | 651.6    | 2.2     |

|                                 |         |      |         |      |         |      |         |      |         |      |         |      |         |      |
|---------------------------------|---------|------|---------|------|---------|------|---------|------|---------|------|---------|------|---------|------|
| Ethyl Butanoate                 | 0.0     |      | 0.0     |      | 0.0     |      | 0.0     |      | 0.0     |      | 0.0     |      | 0.0     |      |
| 2-Methyl-3-Buten-2-ol           | 2976.6  | 7.4  | 0.0     |      | 0.0     |      | 0.0     |      | 0.0     |      | 0.0     |      | 0.0     |      |
| Nonomethyl Succinate            | 3520.9  | 7.4  | 332.6   | 9.3  | 45.6    | 14.0 | 30.5    | 16.3 | 477.6   | 11.6 | 1202.6  | 5.2  | 0.0     |      |
| 2,3-Pentanedione                | 4322.8  | 13.0 | 4040.4  | 1.0  | 5621.8  | 13.2 | 2025.1  | 11.2 | 886.0   | 6.1  | 3204.1  | 12.5 | 17911.1 | 2.4  |
| Dimethyl Disulfide              | 0.0     |      | 37.5    | 13.6 | 250.0   | 13.9 | 46.6    | 0.8  | 322.5   | 1.0  | 302.9   | 1.5  | 0.0     |      |
| 2-Ethenyl-Furan                 | 267.2   | 8.6  | 48.3    | 7.9  | 141.6   | 9.0  | 27.9    | 9.2  | 106.8   | 4.6  | 263.5   | 5.5  | 185.8   | 1.6  |
| 2,5-Diethyltetrahydro-Furan     | 1238.2  | 15.7 | 0.0     |      | 0.0     |      | 0.0     |      | 0.0     |      | 0.0     |      | 0.0     |      |
| Hexanal                         | 0.0     |      | 0.0     |      | 0.0     |      | 0.0     |      | 0.0     |      | 0.0     |      | 0.0     |      |
| 2-Methyl-1-Propanol             | 83.9    | 7.0  | 2613.3  | 0.2  | 1033.2  | 10.7 | 23.1    | 13.4 | 19137.9 | 10.8 | 2101.6  | 1.1  | 0.0     |      |
| 5-Butyl-Dihydro-2(3H)-Furanone  | 9084.9  | 11.1 | 1375.7  | 4.4  | 975.3   | 1.0  | 506.1   | 1.7  | 1645.1  | 1.4  | 1942.4  | 6.1  | 1114.9  | 9.6  |
| m-Cresol                        | 2042.9  | 4.7  | 169.2   | 12.8 | 238.8   | 14.6 | 269.3   | 4.1  | 368.4   | 15.0 | 2300.9  | 5.2  | 3490.7  | 8.4  |
| 1-Butanol                       | 125.1   | 8.8  | 18.5    | 9.5  | 40.6    | 12.3 | 34.9    | 1.0  | 1044.9  | 5.3  | 408.2   | 14.4 | 105.6   | 4.6  |
| 5-Propyl-Dihydro-2(3H)-Furanone | 2635.8  | 5.8  | 642.2   | 10.6 | 300.4   | 9.9  | 274.4   | 0.8  | 1009.7  | 1.5  | 1047.0  | 7.3  | 536.6   | 5.0  |
| 3-Methyl-Pyridazine             | 3329.2  | 5.0  | 1590.5  | 4.1  | 2096.3  | 0.8  | 2183.3  | 13.2 | 3201.6  | 8.1  | 4764.7  | 11.2 | 8754.7  | 4.1  |
| 2-Heptanone                     | 0.0     |      | 0.0     |      | 0.0     |      | 0.0     |      | 0.0     |      | 0.0     |      | 0.0     |      |
| m-Menthane                      | 139.5   | 11.6 | 3.5     | 11.3 | 9.0     | 14.4 | 7.1     | 9.7  | 16.9    | 2.2  | 27.3    | 16.0 | 63.7    | 10.2 |
| 1,3-Diazine                     | 171.6   | 7.7  | 23.2    | 13.5 | 22.1    | 6.1  | 27.2    | 11.1 | 325.7   | 12.0 | 62.5    | 12.3 | 150.1   | 2.9  |
| 2-Methyl-1-Butanol              | 1953.7  | 11.5 | 8135.5  | 4.9  | 5740.1  | 6.8  | 4709.4  | 1.8  | 21874.3 | 8.6  | 14512.1 | 11.9 | 0.0     |      |
| 2-Propyl-Furan                  | 1425.1  | 6.4  | 397.5   | 2.0  | 552.3   | 16.2 | 83.9    | 8.0  | 2172.7  | 9.4  | 105.7   | 11.8 | 3291.2  | 11.8 |
| Ethyl Hexanoate                 | 0.0     |      | 0.0     |      | 0.0     |      | 0.0     |      | 0.0     |      | 0.0     |      | 0.0     |      |
| 2-Pentyl-Furan                  | 12.9    | 6.6  | 2.6     | 10.8 | 3.7     | 8.9  | 110.9   | 5.8  | 13.0    | 5.8  | 19.4    | 1.9  | 12.0    | 10.3 |
| 2-Methyl-Pyrazine               | 1015.8  | 7.6  | 213.5   | 12.0 | 1265.2  | 15.5 | 1014.2  | 6.9  | 1080.1  | 3.1  | 2077.3  | 10.6 | 454.2   | 2.2  |
| 2-Methyl-Dihydro-2(3H)-Furanone | 34004.1 | 1.5  | 17299.6 | 1.8  | 13953.8 | 13.9 | 11415.6 | 8.6  | 15831.7 | 7.7  | 21675.5 | 7.5  | 19081.9 | 11.8 |
| p-Cymene                        | 39.2    | 2.5  | 49.7    | 10.1 | 57.7    | 2.3  | 49.6    | 10.4 | 120.3   | 0.5  | 20.7    | 5.8  | 58.5    | 7.3  |
| Mesitylene                      | 22.6    | 1.9  | 6.4     | 2.1  | 3.2     | 13.9 | 3.5     | 9.4  | 3436.8  | 11.6 | 14.9    | 9.7  | 10.2    | 5.3  |
| 3,5-Xylenol                     | 148.7   | 6.8  | 49.1    | 11.6 | 81.3    | 6.8  | 97.3    | 8.5  | 158.9   | 5.7  | 286.1   | 9.3  | 350.1   | 13.2 |
| 3-Hydroxy-2-Butanone            | 4692.4  | 4.1  | 1264.0  | 1.1  | 1671.9  | 8.8  | 1477.8  | 7.2  | 2171.8  | 13.4 | 3354.1  | 8.4  | 5088.3  | 6.7  |
| Vinylene Carbonate              | 25513.2 | 6.7  | 4045.3  | 1.3  | 7828.1  | 12.9 | 9172.5  | 9.7  | 16120.0 | 4.0  | 19420.9 | 12.7 | 21659.4 | 10.7 |
| 2,6-Xylenol                     | 137.0   | 13.8 | 217.9   | 7.2  | 265.8   | 13.9 | 480.3   | 4.2  | 648.1   | 3.0  | 1249.9  | 8.2  | 1624.2  | 3.4  |
| 1-Hydroxy-2-Propanone           | 14507.6 | 11.3 | 5406.5  | 0.9  | 10358.2 | 0.4  | 6411.6  | 1.6  | 13091.7 | 5.4  | 28531.5 | 7.0  | 21972.9 | 10.8 |

|                                                |          |      |          |      |          |      |         |      |         |      |          |      |          |      |
|------------------------------------------------|----------|------|----------|------|----------|------|---------|------|---------|------|----------|------|----------|------|
| 2-Methyl-2-Cyclopenten-1-one                   | 2219.1   | 1.8  | 332.6    | 2.9  | 624.1    | 2.7  | 485.5   | 2.9  | 1094.2  | 11.9 | 1534.2   | 7.8  | 1830.1   | 5.4  |
| 5-Methyl-2-Furanmethanethiol                   | 695.8    | 14.2 | 3004.1   | 10.5 | 1084.2   | 6.4  | 1428.4  | 1.3  | 8526.8  | 0.9  | 2656.3   | 5.7  | 27.9     | 9.2  |
| 1-Hydroxy-2-Butanone                           | 7661.4   | 12.3 | 1482.4   | 3.8  | 2305.3   | 4.1  | 3674.1  | 1.9  | 656.2   | 4.7  | 7972.4   | 1.6  | 9836.8   | 10.8 |
| 2-Ethyl-6-Methyl-Pyrazine                      | 386.2    | 12.1 | 128.0    | 8.9  | 177.9    | 2.6  | 138.2   | 2.5  | 130.3   | 11.7 | 181.4    | 6.5  | 144.0    | 6.9  |
| 2-Ethyl-5-Methyl-Pyrazine                      | 0.0      |      | 0.0      |      | 0.0      |      | 0.0     |      | 0.0     |      | 0.0      |      | 0.0      |      |
| Nonanal                                        | 984.8    | 13.5 | 637.1    | 1.0  | 643.0    | 10.8 | 508.3   | 7.2  | 681.2   | 5.2  | 1376.7   | 15.2 | 2511.5   | 5.6  |
| Trimethyl-Pyrazine                             | 0.0      |      | 0.0      |      | 0.0      |      | 0.0     |      | 0.0     |      | 0.0      |      | 0.0      |      |
| 3-Ethyl-2-Methyl-1,3-Hexadiene                 | 0.0      |      | 0.0      |      | 0.0      |      | 0.0     |      | 0.0     |      | 0.0      |      | 0.0      |      |
| 2-Cyclohexen-1-one                             | 41.6     | 13.4 | 15.0     | 13.4 | 10.0     | 14.5 | 56.4    | 6.1  | 587.2   | 3.1  | 746.9    | 6.2  | 31.8     | 13.7 |
| 5-Methyl-2(3H)-Furanone                        | 12211.5  | 6.5  | 3164.5   | 9.5  | 5377.5   | 10.8 | 5683.0  | 3.9  | 8085.5  | 2.0  | 10002.6  | 1.5  | 8980.7   | 5.3  |
| 1,3-Dihydro-4-Methyl-2H-Imidazol-2-one         | 4383.4   | 0.3  | 1450.9   | 7.8  | 1885.4   | 1.0  | 1816.1  | 7.9  | 3910.9  | 1.8  | 4005.1   | 1.2  | 6696.1   | 9.9  |
| Ethyl Octanoate                                | 0.0      |      | 0.0      |      | 0.0      |      | 0.0     |      | 0.0     |      | 0.0      |      | 0.0      |      |
| 1,2,3,4-Tetrahydro-1,1,6-Trimethyl-Naphthalene | 16.2     | 5.3  | 267.2    | 6.6  | 246.3    | 14.9 | 192.8   | 2.0  | 483.1   | 2.7  | 694.6    | 4.7  | 370.7    | 8.4  |
| Furfural                                       | 40114.7  | 3.1  | 25043.5  | 2.4  | 26413.9  | 1.6  | 24513.0 | 6.4  | 26387.8 | 10.5 | 32952.1  | 2.7  | 34806.3  | 14.1 |
| Ethanoic Acid                                  | 622455.5 | 2.2  | 317668.4 | 3.2  | 349871.7 | 2.9  | 66429.6 | 5.0  | 76709.6 | 9.1  | 191576.4 | 0.8  | 194203.0 | 2.0  |
| 1,2,3,4-Tetrahydro-1,6,8-Trimethyl-Naphthalene | 830.2    | 4.8  | 555.3    | 2.4  | 794.6    | 4.9  | 447.6   | 1.0  | 670.1   | 2.8  | 1265.3   | 15.7 | 606.5    | 5.1  |
| 2-Ethyl-1-Hexanol                              | 783.3    | 7.0  | 593.1    | 5.6  | 552.3    | 4.6  | 392.4   | 12.2 | 1777.5  | 0.0  | 2997.0   | 4.4  | 855.9    | 8.7  |
| 3-Methyl-Furfural                              | 569.9    | 4.2  | 168.2    | 0.2  | 230.6    | 14.0 | 275.2   | 5.0  | 514.6   | 4.3  | 455.5    | 10.0 | 848.6    | 7.2  |
| Furfuryl Formate                               | 1604.2   | 9.3  | 869.2    | 13.0 | 1344.4   | 14.4 | 1820.2  | 10.4 | 3999.8  | 8.9  | 2991.8   | 0.5  | 4359.7   | 11.4 |
| Decanal                                        | 1724.8   | 7.3  | 922.2    | 1.1  | 78.0     | 4.5  | 250.3   | 0.8  | 1242.0  | 8.6  | 2215.3   | 13.5 | 3199.5   | 10.7 |
| 1-(2-Furanyl)-Ethanone                         | 15678.7  | 3.8  | 10543.7  | 2.3  | 11113.3  | 8.1  | 10890.1 | 3.1  | 14842.7 | 4.5  | 14116.0  | 5.9  | 15542.0  | 13.8 |
| Benzaldehyde                                   | 1868.9   | 2.8  | 895.8    | 5.2  | 562.4    | 17.7 | 611.7   | 7.8  | 675.0   | 1.2  | 1375.2   | 5.9  | 1623.6   | 1.8  |
| Furfuryl Acetate                               | 2230.8   | 4.5  | 592.7    | 12.7 | 938.8    | 16.7 | 1123.8  | 6.1  | 2237.2  | 8.4  | 2016.1   | 5.0  | 3456.7   | 1.1  |
| Propanoic Acid                                 | 734.6    | 4.6  | 226.4    | 3.3  | 220.6    | 6.2  | 2314.0  | 6.0  | 6815.4  | 7.8  | 299.8    | 5.8  | 701.6    | 13.0 |
| Dimethyl Sulfoxide                             | 659.5    | 16.5 | 49.1     | 12.5 | 306.0    | 9.7  | 435.3   | 3.3  | 441.0   | 4.4  | 514.9    | 8.1  | 267.6    | 12.3 |
| 1,2,3,4-Tetrahydro-1,5,8-Trimethyl-Naphthalene | 444.0    | 3.5  | 215.7    | 13.5 | 293.5    | 8.8  | 169.3   | 1.5  | 417.8   | 11.7 | 571.3    | 10.9 | 118.3    | 4.3  |
| 5-Methyl-Furfural                              | 21904.3  | 10.5 | 12916.4  | 9.7  | 14819.6  | 1.1  | 17003.7 | 4.2  | 17848.8 | 5.6  | 18869.5  | 2.1  | 22090.1  | 11.1 |
| 4-Cyclopentene-1,3-dione                       | 20612.7  | 13.7 | 12474.9  | 10.2 | 15726.9  | 2.6  | 13308.5 | 8.6  | 17196.2 | 6.4  | 20881.1  | 2.1  | 21389.0  | 8.8  |
| 2-Methyl-Benzofuran                            | 13073.7  | 14.1 | 4250.3   | 8.3  | 2762.1   | 5.9  | 2345.0  | 6.0  | 8254.9  | 1.6  | 9803.4   | 6.9  | 8989.3   | 0.6  |
| 1-(5-Methyl-2-Furanyl)-Ethanone                | 3859.6   | 13.6 | 558.6    | 10.6 | 662.8    | 8.1  | 1012.7  | 5.4  | 2278.6  | 3.5  | 2243.6   | 8.0  | 2693.8   | 5.3  |
| Diethylene Glycol Ethyl Ether                  | 3325.1   | 0.3  | 1713.8   | 3.6  | 1815.2   | 5.9  | 2017.9  | 5.4  | 1868.5  | 11.4 | 5243.0   | 10.1 | 5155.3   | 13.4 |
| 3-Methyl-Dihydro-2(3H)-Furanone                | 1730.1   | 10.1 | 765.8    | 13.5 | 869.4    | 14.4 | 863.8   | 7.4  | 1738.1  | 2.1  | 1413.1   | 8.4  | 1932.1   | 7.7  |
| 2,3-Dihydro-1,1,4,6-Tetramethyl-1H-Indene      | 48.6     | 13.4 | 44.2     | 10.6 | 62.5     | 2.6  | 31.7    | 7.2  | 81.9    | 4.4  | 130.8    | 4.4  | 81.7     | 7.6  |
| Benzeneacetaldehyde                            | 17699.7  | 8.2  | 776.3    | 6.4  | 972.7    | 5.3  | 3591.8  | 4.3  | 8725.4  | 5.7  | 9758.5   | 6.4  | 12558.9  | 11.9 |

|                                           |         |      |         |      |         |      |         |      |         |      |         |      |         |      |
|-------------------------------------------|---------|------|---------|------|---------|------|---------|------|---------|------|---------|------|---------|------|
| 3,5-Dimethyl-Dihydro-2-Furanone           | 1745.3  | 12.9 | 512.9   | 17.0 | 662.5   | 2.1  | 614.7   | 10.6 | 540.0   | 3.0  | 3382.9  | 1.0  | 1552.4  | 8.3  |
| 2-Propenoic Acid                          | 2598.8  | 7.4  | 45.3    | 11.4 | 3912.6  | 13.2 | 3090.4  | 8.7  | 13197.2 | 2.3  | 6314.2  | 1.4  | 11803.3 | 8.6  |
| Ethyl Decanoate                           | 0.0     |      | 0.0     |      | 0.0     |      | 0.0     |      | 0.0     |      | 0.0     |      | 0.0     |      |
| Acetophenone                              | 577.9   | 0.2  | 121.0   | 8.4  | 123.7   | 12.7 | 184.2   | 12.3 | 313.8   | 12.7 | 300.7   | 3.0  | 786.4   | 12.5 |
| 2-Furanmethanol                           | 28914.3 | 9.8  | 21515.7 | 0.3  | 24661.9 | 3.0  | 18617.5 | 2.7  | 21685.3 | 7.5  | 23273.4 | 11.9 | 52489.4 | 8.4  |
| 3-Furanmethanol                           | 49757.8 | 1.0  | 27453.7 | 11.7 | 35307.1 | 13.4 | 22481.4 | 7.7  | 16348.3 | 6.7  | 18357.0 | 11.2 | 64212.9 | 7.2  |
| 2,3-Dihydro-1,1,5,6-Tetramethyl-1H-Indene | 274.2   | 11.5 | 91.9    | 9.9  | 223.7   | 11.2 | 287.5   | 1.9  | 271.4   | 11.2 | 469.1   | 4.3  | 529.9   | 7.7  |
| 2-(2-Furanylmethyl)-5-Methyl-Furan        | 872.0   | 14.8 | 129.6   | 13.9 | 184.9   | 15.9 | 353.0   | 1.7  | 708.5   | 2.5  | 479.6   | 10.0 | 995.9   | 12.7 |
| 3-Methyl-2(5H)-Furanone                   | 594.7   | 13.9 | 265.6   | 7.1  | 595.2   | 10.6 | 579.3   | 3.8  | 681.4   | 9.7  | 976.3   | 4.6  | 985.7   | 3.5  |
| 5-Methyl-2-Furanmethanol                  | 3490.5  | 10.2 | 1341.8  | 7.3  | 2427.7  | 18.6 | 1929.1  | 6.4  | 2637.3  | 11.0 | 4174.9  | 0.4  | 5391.7  | 12.7 |
| Benzyl Acetate                            | 268.3   | 8.1  | 219.5   | 6.9  | 44.5    | 1.7  | 366.5   | 7.7  | 289.6   | 10.6 | 236.9   | 15.0 | 0.0     |      |
| 2(5H)-Furanone                            | 32145.9 | 12.9 | 14215.7 | 0.6  | 14375.6 | 12.8 | 19058.4 | 5.4  | 7999.2  | 4.7  | 37096.8 | 2.6  | 27152.0 | 3.0  |
| 2,2'-Methylenebis[5-Methyl-Furan          | 728.7   | 11.2 | 333.1   | 12.1 | 505.7   | 14.5 | 377.1   | 2.2  | 681.3   | 7.6  | 1462.2  | 8.4  | 1018.0  | 10.4 |
| 1,2-Cyclopentanedione                     | 39093.3 | 3.2  | 16481.8 | 12.7 | 23452.4 | 4.2  | 26782.4 | 0.9  | 24006.4 | 5.9  | 33818.8 | 4.7  | 39417.0 | 8.6  |
| 2-Cyclohexenol                            | 17588.4 | 6.9  | 5266.8  | 3.7  | 6902.3  | 4.9  | 7666.5  | 5.0  | 9665.4  | 2.5  | 15789.5 | 3.1  | 16990.4 | 4.8  |
| 2-Phenylethyl Acetate                     | 597.1   | 13.8 | 1309.2  | 16.8 | 512.0   | 11.1 | 2664.2  | 6.6  | 6220.2  | 1.5  | 2687.3  | 12.4 | 364.5   | 4.9  |
| 3-Methyl-1,2-Cyclopentanedione            | 24451.5 | 11.2 | 6196.1  | 0.5  | 7471.7  | 9.8  | 9727.3  | 4.3  | 11541.9 | 7.6  | 18549.0 | 0.9  | 21664.8 | 11.6 |
| 2-Ethyl-Hexanoic Acid                     | 0.0     |      | 0.0     |      | 0.0     |      | 0.0     |      | 0.0     |      | 0.0     |      | 0.0     |      |
| β-Damascenone                             | 10111.1 | 8.0  | 339.6   | 2.4  | 201.6   | 3.2  | 3300.4  | 9.6  | 1127.0  | 5.7  | 292.9   | 4.0  | 10703.7 | 5.0  |
| Ethyl Undecanoate                         | 0.0     |      | 0.0     |      | 0.0     |      | 0.0     |      | 0.0     |      | 0.0     |      | 0.0     |      |
| 2-Methyl-Propanoic Acid                   | 9201.1  | 16.0 | 2211.9  | 1.7  | 2846.1  | 4.9  | 3305.0  | 7.8  | 6630.5  | 9.8  | 7936.8  | 6.8  | 12086.5 | 10.5 |
| 2,4,6-Trihydroxypyrimidine                | 31204.5 | 10.5 | 16976.0 | 3.4  | 18202.4 | 6.5  | 17663.8 | 8.2  | 27315.9 | 11.7 | 25867.3 | 3.7  | 26105.2 | 7.7  |
| Mequinol                                  | 3005.5  | 12.2 | 556.4   | 3.1  | 756.6   | 3.2  | 931.4   | 3.3  | 1039.0  | 3.1  | 1573.3  | 3.2  | 2222.2  | 9.7  |
| 2,2-Diethyl-3-Methyl-Oxazolidine          | 6418.8  | 8.6  | 2199.8  | 11.0 | 2857.8  | 17.2 | 3790.2  | 1.9  | 7490.0  | 11.4 | 9522.3  | 4.3  | 13662.4 | 2.5  |
| Oxypurinol                                | 13727.5 | 12.7 | 4555.7  | 3.7  | 4692.5  | 6.5  | 7792.4  | 12.8 | 8884.9  | 6.7  | 12480.4 | 4.6  | 12342.7 | 8.5  |
| Benzenemethanol                           | 9833.6  | 11.0 | 1495.9  | 10.8 | 301.1   | 6.0  | 805.1   | 10.2 | 704.4   | 10.5 | 604.8   | 0.1  | 261.2   | 9.7  |
| 4-Methyl-2(5H)-Furanone                   | 5819.4  | 7.7  | 1480.4  | 5.2  | 2186.2  | 5.7  | 2280.4  | 11.8 | 3179.6  | 9.7  | 4120.6  | 7.5  | 6962.8  | 10.5 |
| 3-Ethyl-2-Hydroxy-2-Cyclopenten-1-one     | 6395.2  | 14.3 | 936.9   | 8.4  | 1288.2  | 5.9  | 1543.9  | 9.2  | 2151.0  | 12.2 | 3124.1  | 9.3  | 3729.0  | 10.2 |
| Benzeneethanol                            | 58.8    | 9.4  | 287.9   | 2.3  | 72.7    | 13.6 | 194.6   | 5.4  | 464.1   | 12.7 | 318.8   | 5.0  | 178.5   | 4.3  |
| Acrylamide                                | 5432.4  | 11.3 | 1208.8  | 5.0  | 2462.7  | 9.7  | 2951.1  | 8.9  | 6052.4  | 5.0  | 6188.3  | 6.0  | 6777.6  | 10.7 |
| Erythritol                                | 13181.9 | 8.0  | 3805.6  | 5.8  | 4221.0  | 6.5  | 4625.2  | 11.4 | 8245.1  | 5.2  | 13061.5 | 1.1  | 17525.1 | 7.7  |
| 2,3-Dimethyl-3-Pyrazolin-5-one            | 2201.5  | 4.6  | 519.9   | 3.5  | 725.2   | 13.1 | 838.8   | 5.9  | 1175.7  | 6.9  | 1585.9  | 12.1 | 1934.6  | 12.1 |
| Furfural Acetone                          | 1677.6  | 13.2 | 504.4   | 9.8  | 683.7   | 6.7  | 782.5   | 10.6 | 1097.1  | 10.8 | 1524.1  | 0.8  | 2071.1  | 7.9  |
| Cyclotene                                 | 4710.4  | 12.4 | 1578.7  | 10.1 | 2362.1  | 17.5 | 3217.2  | 5.3  | 4823.6  | 8.3  | 5438.5  | 5.0  | 7902.0  | 4.7  |

|                                           |          |      |          |      |          |      |          |      |          |      |          |      |          |      |
|-------------------------------------------|----------|------|----------|------|----------|------|----------|------|----------|------|----------|------|----------|------|
| 2-Methyl-1,4-Benzenediol                  | 9547.5   | 6.0  | 907.8    | 4.6  | 1155.0   | 11.6 | 1131.4   | 4.6  | 2171.6   | 11.0 | 2983.8   | 3.5  | 6209.2   | 5.4  |
| Heptanoic Acid                            | 0.0      |      | 0.0      |      | 0.0      |      | 0.0      |      | 0.0      |      | 0.0      |      | 0.0      |      |
| Maltol                                    | 23760.6  | 7.6  | 8143.1   | 13.2 | 10318.0  | 5.4  | 12514.7  | 6.2  | 15762.4  | 7.3  | 17409.2  | 5.4  | 20498.4  | 10.8 |
| 2-Acetylpyrrole                           | 28102.8  | 10.5 | 7518.7   | 6.9  | 8496.4   | 2.7  | 7404.8   | 5.7  | 9360.2   | 7.7  | 14430.4  | 5.7  | 14092.6  | 9.3  |
| 2,5-Furandicarboxaldehyde                 | 44213.2  | 8.7  | 13933.4  | 6.3  | 12905.7  | 14.9 | 16453.0  | 3.7  | 20916.9  | 14.1 | 31055.1  | 1.6  | 33001.5  | 6.5  |
| 2H-Pyran-2,6(3H)-Dione                    | 13931.4  | 7.1  | 2037.0   | 6.7  | 3432.3   | 18.1 | 6873.8   | 11.2 | 14810.2  | 5.9  | 13451.8  | 6.9  | 16447.7  | 6.4  |
| 1-(2-Furanyl)-2-Hydroxy-Ethanone          | 28012.7  | 11.6 | 12311.1  | 4.3  | 20375.4  | 8.8  | 20822.3  | 12.7 | 57419.4  | 0.3  | 17626.4  | 1.2  | 29062.9  | 6.3  |
| Phenol                                    | 11182.0  | 14.6 | 1877.7   | 4.5  | 2431.7   | 9.6  | 2987.2   | 8.8  | 4626.4   | 8.3  | 5719.0   | 12.4 | 8204.7   | 11.4 |
| 1H-Pyrrole-2-Carboxaldehyde               | 5622.0   | 10.5 | 637.0    | 5.9  | 872.0    | 4.2  | 911.5    | 3.4  | 835.0    | 11.1 | 5732.3   | 9.3  | 5897.6   | 4.1  |
| Phloroglucinol                            | 13128.8  | 5.7  | 2680.8   | 9.8  | 4080.1   | 13.0 | 5238.3   | 12.2 | 14692.0  | 6.2  | 12492.0  | 0.3  | 16640.6  | 7.7  |
| Furaneol                                  | 17628.1  | 0.4  | 14166.2  | 2.1  | 15189.2  | 0.8  | 18232.8  | 7.9  | 13267.4  | 1.5  | 15414.6  | 0.6  | 15728.2  | 3.8  |
| Octanoic Acid                             | 189.7    | 10.0 | 261.9    | 8.2  | 344.2    | 17.5 | 403.5    | 3.0  | 203.2    | 14.5 | 330.1    | 7.0  | 383.4    | 8.7  |
| 5-Acetyl-Dihydro-2(3H)-Furanone           | 17646.6  | 1.3  | 11472.5  | 0.5  | 12424.4  | 0.1  | 11865.3  | 5.9  | 11931.0  | 7.9  | 17076.3  | 7.3  | 15308.2  | 7.6  |
| 2-Furanpropionic Acid                     | 10673.2  | 10.1 | 2355.8   | 6.6  | 3286.1   | 11.3 | 4640.8   | 5.7  | 10089.4  | 8.5  | 9669.9   | 1.3  | 11266.7  | 6.0  |
| 1,3-Dihydroxy-2-Propanone                 | 456536.2 | 4.1  | 285396.7 | 2.8  | 355341.2 | 6.1  | 325658.0 | 3.0  | 350592.8 | 3.7  | 417470.4 | 1.4  | 432011.6 | 0.0  |
| Tetrahydro-5-Methyl-2-Furanmethanol       | 148.2    | 4.4  | 12061.3  | 6.8  | 56.7     | 2.9  | 13027.6  | 3.1  | 9247.3   | 1.3  | 16415.9  | 2.4  | 588.9    | 13.2 |
| 4,5-Dimethyl Vinylene Carbonate           | 19934.1  | 5.9  | 6180.3   | 9.3  | 8154.2   | 13.7 | 9842.0   | 5.9  | 6807.3   | 2.1  | 16353.7  | 2.5  | 16034.3  | 10.2 |
| 2-Hydroxy-Dihydro-2(3H)-Furanone          | 4070.6   | 8.5  | 31046.0  | 2.2  | 35819.7  | 0.7  | 30587.2  | 1.2  | 22563.2  | 3.5  | 5312.8   | 1.4  | 5574.3   | 9.1  |
| 5-Acetoxymethyl-2-Furfural A              | 13502.8  | 7.5  | 11357.1  | 6.0  | 12593.0  | 7.0  | 12051.8  | 10.6 | 9644.0   | 2.8  | 17759.4  | 6.7  | 16129.7  | 11.1 |
| 5-Acetoxymethyl-2-Furfural B              | 19318.5  | 3.7  | 12399.1  | 1.5  | 13399.5  | 3.7  | 15313.4  | 5.4  | 17830.9  | 5.1  | 21514.3  | 2.0  | 18481.1  | 9.1  |
| 2-Methoxy-4-Vinyl-Phenol                  | 4120.0   | 8.6  | 817.6    | 10.5 | 1235.9   | 5.1  | 1441.2   | 1.6  | 3060.6   | 13.6 | 3382.6   | 12.2 | 6340.0   | 9.2  |
| 3-Methyl-2,4(3H,5H)-Furandione            | 10561.0  | 9.7  | 3018.8   | 3.1  | 4239.9   | 8.6  | 5296.3   | 3.7  | 6246.8   | 9.6  | 9340.2   | 6.1  | 10253.6  | 10.0 |
| 3-Hydroxy-2,3-Dihydro-Maltol              | 11035.1  | 7.4  | 7496.4   | 11.0 | 9867.8   | 8.4  | 10080.8  | 9.0  | 9991.1   | 8.6  | 13316.2  | 13.9 | 13223.8  | 0.8  |
| Decanoic Acid                             | 3604.8   | 0.7  | 959.2    | 5.3  | 884.3    | 7.9  | 1697.1   | 3.0  | 408.7    | 12.0 | 211.6    | 9.6  | 799.9    | 1.9  |
| 5-Hydroxy-Maltol                          | 46789.7  | 13.0 | 10577.0  | 10.9 | 15988.5  | 14.0 | 22443.4  | 3.7  | 20736.5  | 8.9  | 34672.7  | 4.3  | 38102.8  | 9.9  |
| 2,3-Dihydro-Benzofuran                    | 3548.8   | 11.3 | 852.6    | 3.7  | 1228.6   | 3.3  | 1486.6   | 1.8  | 1690.0   | 2.3  | 2987.3   | 6.2  | 5430.7   | 9.4  |
| 1,4:3,6-Dianhydro-.alpha.-d-Glucopyranose | 8562.3   | 3.9  | 2663.7   | 3.9  | 2815.7   | 0.8  | 4890.1   | 3.8  | 4620.5   | 9.6  | 8321.9   | 4.2  | 7118.6   | 6.5  |
| 4-Pyridinol                               | 16057.9  | 6.9  | 3758.5   | 0.4  | 5495.9   | 12.7 | 6563.0   | 3.9  | 8979.0   | 4.2  | 12385.3  | 8.3  | 13378.4  | 8.4  |
| 4-Amino-Phenol                            | 11355.1  | 7.5  | 2040.5   | 2.2  | 3431.0   | 7.8  | 3681.8   | 4.6  | 4643.1   | 0.4  | 7835.5   | 6.7  | 10392.8  | 11.8 |
| Benzoic Acid                              | 14984.6  | 6.5  | 44.6     | 7.1  | 15.6     | 5.1  | 1746.9   | 3.7  | 1495.7   | 5.6  | 2990.6   | 2.7  | 2896.9   | 2.6  |
| Dimethylhydrazone 3-Pentanone             | 14574.4  | 6.0  | 5343.2   | 9.5  | 7146.6   | 3.9  | 7770.4   | 5.0  | 5269.3   | 0.2  | 22368.8  | 0.3  | 15247.3  | 12.2 |
| Undecanoic Acid                           | 10566.7  | 6.6  | 79.7     | 9.7  | 228.5    | 5.5  | 1775.2   | 3.1  | 161.6    | 4.5  | 766.0    | 1.6  | 221.6    | 13.9 |
| 5-(Hydroxymethyl)-Dihydro-2(3H)-Furanone  | 34037.4  | 12.5 | 27394.2  | 5.2  | 30405.2  | 6.3  | 31683.7  | 8.0  | 41433.5  | 3.5  | 20401.6  | 4.4  | 75799.6  | 11.3 |
| Dodecanoic Acid                           | 3489.1   | 10.2 | 74.7     | 7.9  | 194.0    | 4.4  | 1125.4   | 3.8  | 1307.2   | 6.3  | 3671.4   | 5.8  | 2390.5   | 13.6 |

|                                  |          |      |          |      |          |      |          |     |          |      |          |     |          |      |
|----------------------------------|----------|------|----------|------|----------|------|----------|-----|----------|------|----------|-----|----------|------|
| 5-(Hydroxymethyl)-2-Furfural     | 159244.2 | 5.2  | 178092.7 | 0.4  | 207323.6 | 4.9  | 164599.0 | 4.5 | 198276.1 | 10.3 | 165006.0 | 1.3 | 172268.3 | 5.2  |
| 3-Methoxy-1,2-Benzenediol        | 6999.2   | 4.2  | 2006.7   | 6.8  | 2443.1   | 14.8 | 3640.6   | 1.4 | 5633.7   | 9.9  | 7682.9   | 3.9 | 14099.0  | 6.8  |
| 1-(2-Furanyl)-1,2-Ethanediol     | 42992.2  | 1.4  | 14002.0  | 10.1 | 11221.4  | 8.4  | 12514.4  | 2.6 | 14995.6  | 10.9 | 15521.4  | 0.2 | 22502.6  | 10.8 |
| 4-Hydroxy-Dihydro-2(3H)-Furanone | 27068.9  | 10.8 | 6722.6   | 6.9  | 9676.9   | 13.5 | 13815.3  | 4.1 | 19296.8  | 4.3  | 23371.3  | 0.8 | 29163.2  | 13.9 |

<sup>1</sup>RSD - Relative Standard Deviation values.

**Table S3B.** Mean and relative standard deviation values of identified VOCs in sugarcane-based syrups samples from NCERT group.

| Volatile Organic Compound | Relative Peak Areas (x 10 <sup>3</sup> ) |         |         |         |         |         |
|---------------------------|------------------------------------------|---------|---------|---------|---------|---------|
|                           | NCERT                                    |         |         |         |         |         |
|                           | ECAL14                                   |         | ENCAL14 |         | GLA14   |         |
|                           | Mean                                     | RSD (%) | Mean    | RSD (%) | Mean    | RSD (%) |
| Pentane                   | 42.5                                     | 4.6     | 41.7    | 6.5     | 122.3   | 12.6    |
| Hexane                    | 112.2                                    | 5.2     | 69.7    | 0.5     | 235.8   | 3.0     |
| 1,4-Pentadiene            | 0.0                                      |         | 2.6     | 8.5     | 0.0     |         |
| Methanethiol              | 494.9                                    | 3.9     | 177.0   | 2.4     | 161.3   | 5.9     |
| Ethanal                   | 4952.9                                   | 12.1    | 48.2    | 0.2     | 10061.5 | 3.0     |
| Dimethyl Sulfide          | 2901.7                                   | 9.6     | 7643.0  | 10.1    | 558.4   | 8.5     |
| Propanal                  | 827.2                                    | 5.1     | 315.0   | 6.8     | 1421.5  | 6.5     |
| Furan                     | 1982.9                                   | 0.9     | 2777.0  | 8.9     | 2118.5  | 4.8     |
| 2-Methyl-Propanal         | 12951.6                                  | 5.0     | 6195.3  | 0.7     | 9333.3  | 2.4     |
| Ethyl Formate             | 3245.0                                   | 6.9     | 0.0     |         | 2067.2  | 5.7     |
| 2-Propenal                | 519.3                                    | 8.2     | 27.8    | 6.6     | 350.3   | 5.3     |
| 2-Methyl-Furan            | 2158.4                                   | 3.4     | 166.1   | 0.2     | 2450.4  | 1.6     |
| Ethyl Acetate             | 10340.2                                  | 3.3     | 8.5     | 14.9    | 20056.1 | 6.9     |
| 2-Butanone                | 382.6                                    | 8.5     | 70.3    | 8.9     | 545.4   | 9.0     |
| 2-Methyl-Butanal          | 23157.1                                  | 1.3     | 8960.3  | 0.4     | 14780.3 | 3.4     |
| 3-Methyl-Butanal          | 28252.9                                  | 1.3     | 1592.0  | 7.7     | 8899.9  | 2.2     |
| Ethanol                   | 59701.7                                  | 5.1     | 47501.2 | 8.0     | 3150.3  | 5.7     |
| Benzene                   | 118.8                                    | 3.9     | 3.7     | 6.7     | 35.5    | 11.6    |
| 3-Buten-2-one             | 1046.7                                   | 4.7     | 46.2    | 10.5    | 3489.1  | 0.5     |

|                                 |         |      |        |      |         |      |
|---------------------------------|---------|------|--------|------|---------|------|
| 2,5-Dimethyl-Furan              | 1296.2  | 4.3  | 88.4   | 5.6  | 2696.3  | 9.4  |
| Ethyl Propanoate                | 0.0     |      | 0.0    |      | 10327.3 | 1.0  |
| 2,3-Butanedione                 | 11909.1 | 9.6  | 212.0  | 7.4  | 20966.1 | 0.9  |
| 2-Methylpropyl Acetate          | 58.4    | 5.6  | 0.0    |      | 1987.0  | 7.1  |
| 1-Propanol                      | 1677.6  | 9.7  | 0.0    |      | 10237.8 | 2.5  |
| 2-Ethyl-5-Methyl-Furan          | 14.8    | 8.0  | 0.0    |      | 703.9   | 6.1  |
| Toluene                         | 3899.0  | 10.5 | 1258.9 | 9.0  | 5073.9  | 0.4  |
| Ethyl Butanoate                 | 0.0     |      | 0.0    |      | 1270.8  | 6.5  |
| 2-Methyl-3-Buten-2-ol           | 840.5   | 9.0  | 18.8   | 0.1  | 0.0     |      |
| Nonomethyl Succinate            | 324.2   | 1.2  | 24.0   | 8.9  | 0.0     |      |
| 2,3-Pentanedione                | 5060.6  | 7.7  | 125.7  | 3.8  | 9459.5  | 6.0  |
| Dimethyl Disulfide              | 2179.6  | 4.9  | 0.0    |      | 0.0     |      |
| 2-Ethenyl-Furan                 | 219.2   | 2.3  | 27.7   | 1.1  | 35.3    | 12.1 |
| 2,5-Diethyltetrahydro-Furan     | 210.2   | 10.2 | 0.0    |      | 0.0     |      |
| Hexanal                         | 0.0     |      | 13.3   | 2.9  | 0.0     |      |
| 2-Methyl-1-Propanol             | 18.9    | 3.9  | 7.6    | 4.1  | 41073.2 | 2.9  |
| 5-Butyl-Dihydro-2(3H)-Furanone  | 1079.8  | 11.1 | 33.4   | 12.2 | 15.0    | 4.4  |
| m-Cresol                        | 132.2   | 7.3  | 19.4   | 3.4  | 986.8   | 1.5  |
| 1-Butanol                       | 68.4    | 12.7 | 0.0    |      | 1059.2  | 2.9  |
| 5-Propyl-Dihydro-2(3H)-Furanone | 728.4   | 5.7  | 9.8    | 3.5  | 14.4    | 8.0  |
| 3-Methyl-Pyridazine             | 776.7   | 9.3  | 11.8   | 2.6  | 2473.6  | 3.2  |
| 2-Heptanone                     | 8.6     | 1.9  | 0.0    |      | 0.0     |      |
| m-Menthane                      | 0.0     |      | 0.0    |      | 0.0     |      |
| 1,3-Diazine                     | 364.4   | 6.3  | 1.6    | 2.5  | 988.6   | 4.9  |
| 2-Methyl-1-Butanol              | 5493.2  | 9.8  | 976.9  | 9.1  | 19225.4 | 1.0  |
| 2-Propyl-Furan                  | 55.7    | 12.9 | 7.3    | 7.0  | 528.1   | 7.2  |
| Ethyl Hexanoate                 | 0.0     |      | 0.0    |      | 295.7   | 15.2 |
| 2-Pentyl-Furan                  | 0.0     |      | 10.8   | 8.1  | 0.0     |      |
| 2-Methyl-Pyrazine               | 1828.5  | 6.9  | 36.1   | 5.7  | 799.4   | 1.3  |
| 2-Methyl-Dihydro-2(3H)-Furanone | 17829.4 | 5.2  | 69.7   | 14.3 | 2505.0  | 5.3  |
| p-Cymene                        | 53.9    | 3.4  | 0.0    |      | 212.6   | 8.6  |
| Mesitylene                      | 3.8     | 1.7  | 0.0    |      | 116.7   | 3.3  |
| 3,5-Xylenol                     | 0.0     |      | 0.0    |      | 88.4    | 1.3  |
| 3-Hydroxy-2-Butanone            | 715.2   | 2.8  | 368.0  | 12.7 | 1920.1  | 2.2  |

|                                                 |          |      |          |      |          |      |
|-------------------------------------------------|----------|------|----------|------|----------|------|
| Vinylene Carbonate                              | 4192.5   | 9.8  | 83.3     | 4.5  | 12628.8  | 4.7  |
| 2,6-Xylenol                                     | 186.0    | 9.2  | 4.8      | 4.8  | 269.9    | 7.2  |
| 1-Hydroxy-2-Propanone                           | 8601.1   | 13.8 | 3732.0   | 1.7  | 20944.0  | 2.3  |
| 2,5-Dimethyl-Pyrazine                           | 108.5    | 4.9  | 94.8     | 4.8  | 127.6    | 4.2  |
| 2,6-Dimethyl-Pyrazine                           | 1440.2   | 4.9  | 29.4     | 9.0  | 997.5    | 4.2  |
| 2-Cyclopenten-1-one                             | 391.5    | 1.9  | 17.1     | 3.2  | 1074.8   | 5.6  |
| 1,2,3,4-Tetramethyl-4-(1-methylethenyl)-Benzene | 0.0      |      | 0.0      |      | 0.0      |      |
| 2-Methyl-2-Cyclopenten-1-one                    | 168.8    | 2.6  | 21.9     | 16.7 | 419.5    | 3.9  |
| 5-Methyl-2-Furanmethanethiol                    | 2029.3   | 1.3  | 11.5     | 3.6  | 13381.6  | 3.2  |
| 1-Hydroxy-2-Butanone                            | 1318.8   | 14.3 | 102.7    | 3.7  | 4740.7   | 2.0  |
| 2-Ethyl-6-Methyl-Pyrazine                       | 144.0    | 9.7  | 14.1     | 2.1  | 31.9     | 8.5  |
| 2-Ethyl-5-Methyl-Pyrazine                       | 0.0      |      | 0.0      |      | 0.0      |      |
| Nonanal                                         | 2078.7   | 5.6  | 202.0    | 7.4  | 472.8    | 0.4  |
| Trimethyl-Pyrazine                              | 0.0      |      | 0.0      |      | 0.0      |      |
| 3-Ethyl-2-Methyl-1,3-Hexadiene                  | 0.0      |      | 0.0      |      | 0.0      |      |
| 2-Cyclohexen-1-one                              | 24.0     | 4.4  | 98.9     | 10.9 | 84.5     | 12.0 |
| 5-Methyl-2(3H)-Furanone                         | 1670.7   | 4.8  | 157.5    | 0.3  | 4396.5   | 3.3  |
| 1,3-Dihydro-4-Methyl-2H-Imidazol-2-one          | 861.2    | 0.5  | 79.9     | 9.4  | 2433.8   | 0.5  |
| Ethyl Octanoate                                 | 0.0      |      | 0.0      |      | 1247.6   | 4.7  |
| 1,2,3,4-Tetrahydro-1,1,6-Trimethyl-Naphthalene  | 111.7    | 4.8  | 3.4      | 8.4  | 70.1     | 3.6  |
| Furfural                                        | 24065.2  | 7.8  | 26526.1  | 8.4  | 39888.4  | 7.6  |
| Ethanoic Acid                                   | 351640.1 | 0.1  | 235969.8 | 9.2  | 436448.0 | 0.7  |
| 1,2,3,4-Tetrahydro-1,6,8-Trimethyl-Naphthalene  | 214.9    | 6.7  | 4.9      | 1.2  | 357.8    | 3.4  |
| 2-Ethyl-1-Hexanol                               | 543.4    | 5.0  | 67.7     | 6.1  | 11461.3  | 2.6  |
| 3-Methyl-Furfural                               | 4521.9   | 6.4  | 1949.6   | 0.9  | 232.6    | 5.9  |
| Furfuryl Formate                                | 344.6    | 10.6 | 54.9     | 0.6  | 1513.1   | 1.2  |
| Decanal                                         | 150.9    | 0.9  | 82.7     | 7.8  | 447.3    | 11.5 |
| 1-(2-Furanyl)-Ethanone                          | 10443.6  | 9.5  | 42.1     | 4.0  | 15861.4  | 5.5  |
| Benzaldehyde                                    | 402.0    | 11.8 | 6.1      | 13.1 | 1237.3   | 1.5  |
| Furfuryl Acetate                                | 211.6    | 10.9 | 105.7    | 1.5  | 946.5    | 1.6  |
| Propanoic Acid                                  | 905.5    | 9.3  | 0.0      |      | 6991.8   | 1.5  |
| Dimethyl Sulfoxide                              | 89.7     | 6.6  | 49.9     | 11.1 | 313.5    | 11.9 |
| 1,2,3,4-Tetrahydro-1,5,8-Trimethyl-Naphthalene  | 101.1    | 9.0  | 5.3      | 6.5  | 299.5    | 1.9  |
| 5-Methyl-Furfural                               | 5231.7   | 10.3 | 371.9    | 3.4  | 18746.7  | 1.9  |

|                                           |         |      |         |      |         |      |
|-------------------------------------------|---------|------|---------|------|---------|------|
| 4-Cyclopentene-1,3-dione                  | 4418.4  | 6.4  | 253.9   | 4.6  | 11639.3 | 11.8 |
| 2-Methyl-Benzofuran                       | 3396.0  | 6.1  | 22.4    | 12.9 | 2444.4  | 7.3  |
| 1-(5-Methyl-2-Furanyl)-Ethanone           | 267.2   | 2.9  | 110.8   | 6.6  | 970.2   | 0.9  |
| Diethylene Glycol Ethyl Ether             | 1027.6  | 14.2 | 24.3    | 7.5  | 2046.1  | 6.9  |
| 3-Methyl-Dihydro-2(3H)-Furanone           | 438.6   | 12.0 | 135.6   | 5.8  | 1905.2  | 2.6  |
| 2,3-Dihydro-1,1,4,6-Tetramethyl-1H-Indene | 0.0     |      | 0.0     |      | 0.0     |      |
| Benzeneacetaldehyde                       | 211.6   | 8.4  | 105.4   | 12.7 | 5725.5  | 2.6  |
| 3,5-Dimethyl-Dihydro-2-Furanone           | 467.1   | 15.0 | 15782.3 | 11.6 | 1210.6  | 2.1  |
| 2-Propenoic Acid                          | 1392.2  | 4.8  | 876.8   | 5.8  | 7719.3  | 4.3  |
| Ethyl Decanoate                           | 0.0     |      | 0.0     |      | 2251.8  | 3.3  |
| Acetophenone                              | 0.0     |      | 0.0     |      | 0.0     |      |
| 2-Furanmethanol                           | 22314.2 | 1.7  | 26043.7 | 0.3  | 28262.0 | 4.2  |
| 3-Furanmethanol                           | 36432.8 | 9.1  | 35767.9 | 7.5  | 29598.2 | 0.4  |
| 2,3-Dihydro-1,1,5,6-Tetramethyl-1H-Indene | 0.0     |      | 6.5     | 15.1 | 298.0   | 0.3  |
| 2-(2-Furanylmethyl)-5-Methyl-Furan        | 0.0     |      | 14.6    | 4.1  | 20.1    | 6.7  |
| 3-Methyl-2(5H)-Furanone                   | 341.1   | 4.9  | 107.5   | 6.2  | 729.4   | 2.6  |
| 5-Methyl-2-Furanmethanol                  | 1525.8  | 4.2  | 156.8   | 1.4  | 1766.7  | 0.0  |
| Benzyl Acetate                            | 14.4    | 4.6  | 26.1    | 3.6  | 2030.0  | 2.1  |
| 2(5H)-Furanone                            | 4672.0  | 11.5 | 8830.0  | 0.9  | 18121.2 | 1.3  |
| 2,2'-Methylenebis[5-Methyl-Furan          | 164.8   | 3.9  | 8.1     | 4.8  | 335.5   | 10.3 |
| 1,2-Cyclopentanedione                     | 13747.0 | 11.4 | 636.5   | 8.3  | 23467.2 | 10.7 |
| 2-Cyclohexenol                            | 2332.9  | 15.6 | 173.5   | 6.7  | 6820.4  | 7.8  |
| 2-Phenylethyl Acetate                     | 728.0   | 3.7  | 12.1    | 1.3  | 8907.3  | 3.6  |
| 3-Methyl-1,2-Cyclopentanedione            | 3671.9  | 11.0 | 123.4   | 2.0  | 9352.2  | 6.2  |
| 2-Ethyl-Hexanoic Acid                     | 0.0     |      | 0.0     |      | 0.0     |      |
| β-Damascenone                             | 1788.6  | 4.8  | 420.2   | 6.1  | 335.3   | 6.1  |
| Ethyl Undecanoate                         | 0.0     |      | 0.0     |      | 4396.7  | 4.3  |
| 2-Methyl-Propanoic Acid                   | 2987.5  | 8.4  | 200.4   | 8.4  | 7779.0  | 1.6  |
| 2,4,6-Trihydroxypyrimidine                | 115.1   | 8.1  | 110.2   | 4.6  | 183.7   | 13.9 |
| Mequinol                                  | 568.3   | 4.2  | 87.9    | 6.4  | 1098.4  | 0.5  |
| 2,2-Diethyl-3-Methyl-Oxazolidine          | 1488.0  | 9.0  | 14.6    | 4.7  | 7218.6  | 1.3  |
| Oxypurinol                                | 2013.4  | 10.8 | 86.6    | 0.6  | 5598.4  | 9.5  |
| Benzenemethanol                           | 97.7    | 8.0  | 712.9   | 5.4  | 6035.1  | 5.0  |
| 4-Methyl-2(5H)-Furanone                   | 345.8   | 6.1  | 180.4   | 4.6  | 1516.3  | 9.4  |

|                                           |          |      |          |      |          |      |
|-------------------------------------------|----------|------|----------|------|----------|------|
| 3-Ethyl-2-Hydroxy-2-Cyclopenten-1-one     | 57.2     | 8.1  | 147.9    | 2.0  | 58.7     | 9.5  |
| Benzeneethanol                            | 21.0     | 11.7 | 234.3    | 8.5  | 3935.6   | 1.3  |
| Acrylamide                                | 318.3    | 5.1  | 158.8    | 5.7  | 4892.5   | 1.6  |
| Erythritol                                | 4033.2   | 11.3 | 162.3    | 3.6  | 11590.7  | 2.5  |
| 2,3-Dimethyl-3-Pyrazolin-5-one            | 430.1    | 3.8  | 228.8    | 0.5  | 918.4    | 5.1  |
| Furfural Acetone                          | 275.0    | 3.3  | 25.7     | 8.8  | 680.4    | 3.0  |
| Cyclotene                                 | 918.1    | 1.8  | 34.9     | 4.2  | 2451.7   | 0.7  |
| 2-Methyl-1,4-Benzenediol                  | 607.3    | 4.7  | 51.6     | 4.8  | 2668.6   | 6.9  |
| Heptanoic Acid                            | 0.0      |      | 0.0      |      | 0.0      |      |
| Maltol                                    | 4193.9   | 6.7  | 452.2    | 0.4  | 18265.0  | 6.2  |
| 2-Acetylpyrrole                           | 12048.1  | 11.9 | 162.2    | 1.0  | 6616.0   | 6.6  |
| 2,5-Furandicarboxaldehyde                 | 2000.1   | 10.7 | 207.5    | 8.0  | 10560.1  | 8.4  |
| 2H-Pyran-2,6(3H)-Dione                    | 3697.3   | 14.9 | 408.8    | 10.6 | 8833.4   | 0.6  |
| 1-(2-Furanyl)-2-Hydroxy-Ethanone          | 8757.6   | 12.3 | 322.7    | 16.5 | 22009.4  | 0.1  |
| Phenol                                    | 1355.1   | 11.5 | 249.8    | 7.0  | 3044.0   | 7.3  |
| 1H-Pyrrole-2-Carboxaldehyde               | 465.0    | 5.0  | 271.3    | 2.9  | 764.6    | 1.5  |
| Phloroglucinol                            | 3482.9   | 5.4  | 197.4    | 6.4  | 11418.1  | 6.6  |
| Furaneol                                  | 12225.3  | 5.2  | 210.8    | 10.9 | 17418.6  | 2.3  |
| Octanoic Acid                             | 0.0      |      | 0.0      |      | 0.0      |      |
| 5-Acetyl-Dihydro-2(3H)-Furanone           | 10035.2  | 2.9  | 4429.2   | 10.3 | 13329.8  | 1.0  |
| 2-Furanpropionic Acid                     | 1702.5   | 3.8  | 254.4    | 7.9  | 3792.1   | 9.9  |
| 1,3-Dihydroxy-2-Propanone                 | 485174.0 | 3.9  | 388898.4 | 5.5  | 591962.9 | 2.8  |
| Tetrahydro-5-Methyl-2-Furanmethanol       | 22011.4  | 0.6  | 23174.0  | 0.2  | 25808.6  | 6.7  |
| 4,5-Dimethyl Vinylene Carbonate           | 10237.0  | 4.3  | 849.0    | 9.7  | 20933.8  | 4.7  |
| 2-Hydroxy-Dihydro-2(3H)-Furanone          | 28684.2  | 1.6  | 1801.7   | 4.2  | 31450.3  | 15.9 |
| 5-Acetoxymethyl-2-Furfural A              | 3533.0   | 12.4 | 460.0    | 0.8  | 16472.2  | 3.0  |
| 5-Acetoxymethyl-2-Furfural B              | 6645.3   | 10.9 | 161.8    | 4.0  | 14550.9  | 9.3  |
| 2-Methoxy-4-Vinyl-Phenol                  | 473.5    | 9.6  | 32.5     | 6.9  | 2040.3   | 8.3  |
| 3-Methyl-2,4(3H,5H)-Furandione            | 1946.3   | 0.4  | 108.9    | 8.7  | 4473.0   | 2.7  |
| 3-Hydroxy-2,3-Dihydro-Maltol              | 9598.6   | 4.6  | 379.0    | 9.4  | 17345.5  | 6.1  |
| Decanoic Acid                             | 1076.2   | 11.3 | 0.0      |      | 1723.3   | 9.2  |
| 5-Hydroxy-Maltol                          | 10933.8  | 6.9  | 293.4    | 11.8 | 15669.2  | 2.4  |
| 2,3-Dihydro-Benzofuran                    | 677.8    | 3.1  | 15.5     | 1.8  | 2176.2   | 6.0  |
| 1,4:3,6-Dianhydro-.alpha.-d-Glucopyranose | 2210.5   | 12.9 | 224.5    | 15.1 | 5059.1   | 10.8 |

|                                          |          |      |          |     |          |      |
|------------------------------------------|----------|------|----------|-----|----------|------|
| 4-Pyridinol                              | 209.9    | 5.6  | 167.5    | 7.9 | 764.5    | 2.0  |
| 4-Amino-Phenol                           | 1906.5   | 8.1  | 329.2    | 2.5 | 5969.6   | 10.8 |
| Benzoic Acid                             | 412.8    | 2.9  | 83.8     | 1.8 | 4420.2   | 8.2  |
| Dimethylhydrazone 3-Pentanone            | 7288.3   | 6.8  | 355.5    | 0.2 | 21524.1  | 7.6  |
| Undecanoic Acid                          | 0.0      |      | 750.8    | 2.7 | 0.0      |      |
| 5-(Hydroxymethyl)-Dihydro-2(3H)-Furanone | 27257.6  | 1.4  | 349.1    | 1.2 | 34394.5  | 7.4  |
| Dodecanoic Acid                          | 1030.8   | 8.8  | 0.0      |     | 1051.1   | 9.1  |
| 5-(Hydroxymethyl)-2-Furfural             | 140874.2 | 7.0  | 149808.3 | 4.0 | 132041.3 | 6.7  |
| 3-Methoxy-1,2-Benzenediol                | 111.4    | 4.7  | 167.7    | 5.6 | 586.3    | 0.2  |
| 1-(2-Furanyl)-1,2-Ethanediol             | 22317.1  | 10.3 | 28897.8  | 7.0 | 45811.6  | 10.0 |
| 4-Hydroxy-Dihydro-2(3H)-Furanone         | 7639.0   | 0.0  | 323.0    | 8.8 | 19828.1  | 4.9  |

<sup>1</sup>RSD - Relative Standard Deviation values.

**Table S3C.** Mean and relative standard deviation values of identified VOCs in sugarcane-based syrups samples from MED group.

| Volatile Organic Compound | Relative Peak Areas (x 10 <sup>3</sup> ) |         |         |         |         |         |         |         |         |         |
|---------------------------|------------------------------------------|---------|---------|---------|---------|---------|---------|---------|---------|---------|
|                           | MED                                      |         |         |         |         |         |         |         |         |         |
|                           | ESP16                                    |         | EGP17   |         | EGPA16  |         | EGPB16  |         | EGPC16  |         |
|                           | Mean                                     | RSD (%) | Mean    | RSD (%) | Mean    | RSD (%) | Mean    | RSD (%) | Mean    | RSD (%) |
| Pentane                   | 85.8                                     | 1.7     | 257.6   | 11.5    | 326.1   | 7.6     | 256.5   | 6.0     | 353.1   | 9.7     |
| Hexane                    | 293.5                                    | 9.6     | 410.6   | 5.5     | 470.4   | 2.7     | 63.2    | 0.8     | 161.9   | 4.5     |
| 1,4-Pentadiene            | 0.0                                      |         | 0.0     |         | 0.0     |         | 0.0     |         | 0.0     |         |
| Methanethiol              | 122.6                                    | 13.7    | 758.4   | 12.2    | 991.6   | 15.0    | 289.7   | 4.5     | 15.4    | 2.7     |
| Ethanal                   | 2100.1                                   | 4.5     | 6375.9  | 9.8     | 6589.4  | 14.4    | 2052.6  | 1.1     | 1209.7  | 2.8     |
| Dimethyl Sulfide          | 31.0                                     | 2.5     | 14592.5 | 0.5     | 16372.3 | 4.1     | 13183.5 | 3.8     | 10944.4 | 3.1     |
| Propanal                  | 693.9                                    | 1.9     | 985.5   | 8.8     | 1310.8  | 4.2     | 345.4   | 8.6     | 263.6   | 2.3     |
| Furan                     | 892.0                                    | 1.6     | 2921.2  | 6.1     | 3175.7  | 2.4     | 1756.8  | 1.0     | 604.9   | 8.3     |
| 2-Methyl-Propanal         | 4577.4                                   | 4.4     | 8903.1  | 0.7     | 11437.7 | 3.8     | 8057.4  | 6.8     | 7306.5  | 3.0     |
| Ethyl Formate             | 0.0                                      |         | 0.0     |         | 0.0     |         | 797.2   | 2.3     | 0.0     |         |
| 2-Propenal                | 375.1                                    | 2.8     | 543.1   | 4.2     | 773.1   | 1.3     | 115.1   | 2.2     | 39.4    | 3.5     |
| 2-Methyl-Furan            | 1863.5                                   | 2.9     | 1991.1  | 5.5     | 5079.6  | 2.8     | 752.6   | 1.8     | 453.1   | 6.2     |
| Ethyl Acetate             | 807.2                                    | 5.7     | 9272.9  | 4.4     | 368.7   | 3.6     | 643.5   | 5.4     | 78.1    | 9.7     |

|                                 |         |      |          |      |         |      |         |      |         |      |
|---------------------------------|---------|------|----------|------|---------|------|---------|------|---------|------|
| 2-Butanone                      | 212.2   | 11.7 | 516.6    | 3.3  | 718.2   | 0.8  | 291.4   | 13.7 | 236.9   | 7.9  |
| 2-Methyl-Butanal                | 6177.6  | 8.6  | 11354.7  | 4.3  | 13906.9 | 3.0  | 11606.8 | 7.2  | 8844.6  | 3.3  |
| 3-Methyl-Butanal                | 3173.7  | 0.6  | 10858.7  | 4.0  | 27573.6 | 3.2  | 10669.6 | 9.7  | 4376.8  | 3.5  |
| Ethanol                         | 47770.4 | 5.9  | 104713.6 | 0.9  | 53733.8 | 5.3  | 37606.6 | 3.4  | 11995.2 | 1.6  |
| Benzene                         | 46.3    | 4.1  | 133.2    | 2.1  | 62.7    | 4.5  | 48.7    | 8.7  | 47.0    | 4.7  |
| 3-Buten-2-one                   | 931.3   | 6.5  | 2533.4   | 5.6  | 1003.1  | 11.5 | 278.6   | 12.5 | 44.6    | 3.2  |
| 2,5-Dimethyl-Furan              | 829.2   | 12.9 | 1637.8   | 0.2  | 1041.0  | 1.0  | 826.6   | 7.7  | 144.5   | 5.6  |
| Ethyl Propanoate                | 0.0     |      | 0.0      |      | 0.0     |      | 0.0     |      | 0.0     |      |
| 2,3-Butanedione                 | 8645.1  | 9.0  | 16239.7  | 10.6 | 15944.2 | 2.2  | 4665.0  | 10.4 | 1349.8  | 0.2  |
| 2-Methylpropyl Acetate          | 0.0     |      | 0.0      |      | 0.0     |      | 0.0     |      | 0.0     |      |
| 1-Propanol                      | 0.0     |      | 0.0      |      | 0.0     |      | 649.4   | 9.7  | 0.0     |      |
| 2-Ethyl-5-Methyl-Furan          | 82.2    | 5.4  | 464.6    | 9.8  | 153.4   | 2.6  | 175.3   | 2.0  | 7.8     | 9.4  |
| Toluene                         | 19.7    | 0.2  | 1126.6   | 4.9  | 6926.8  | 1.1  | 1548.1  | 3.4  | 292.2   | 2.3  |
| Ethyl Butanoate                 | 0.0     |      | 144.3    | 0.7  | 7.5     | 10.4 | 0.0     |      | 0.0     |      |
| 2-Methyl-3-Buten-2-ol           | 0.0     |      | 0.0      |      | 0.0     |      | 0.0     |      | 0.0     |      |
| Nonomethyl Succinate            | 0.0     |      | 3151.5   | 1.9  | 44.0    | 12.8 | 909.5   | 6.2  | 58.8    | 2.3  |
| 2,3-Pentanedione                | 3718.4  | 1.2  | 8015.3   | 3.5  | 7548.8  | 3.3  | 497.5   | 10.2 | 282.8   | 2.3  |
| Dimethyl Disulfide              | 55.3    | 1.7  | 161.3    | 2.3  | 365.7   | 7.4  | 476.0   | 1.7  | 38.8    | 11.0 |
| 2-Ethenyl-Furan                 | 57.5    | 5.1  | 454.0    | 2.3  | 629.7   | 2.4  | 104.6   | 8.7  | 34.8    | 6.1  |
| 2,5-Diethyltetrahydro-Furan     | 0.0     |      | 0.0      |      | 0.0     |      | 0.0     |      | 0.0     |      |
| Hexanal                         | 0.0     |      | 417.7    | 0.1  | 612.9   | 10.7 | 27.7    | 8.2  | 50.2    | 12.7 |
| 2-Methyl-1-Propanol             | 31.0    | 12.8 | 140.1    | 6.4  | 41.2    | 6.9  | 71.1    | 4.0  | 14.2    | 3.0  |
| 5-Butyl-Dihydro-2(3H)-Furanone  | 88.1    | 3.3  | 95.3     | 4.3  | 98.1    | 5.0  | 7.0     | 6.5  | 10.8    | 2.3  |
| m-Cresol                        | 72.9    | 10.2 | 382.2    | 0.8  | 172.9   | 6.7  | 5.4     | 5.7  | 4.7     | 3.8  |
| 1-Butanol                       | 18.1    | 4.9  | 0.0      |      | 0.0     |      | 0.0     |      | 18.0    | 5.7  |
| 5-Propyl-Dihydro-2(3H)-Furanone | 11.2    | 6.2  | 131.2    | 1.4  | 671.5   | 3.0  | 15.8    | 2.1  | 10.4    | 1.6  |
| 3-Methyl-Pyridazine             | 66.2    | 7.7  | 535.5    | 1.8  | 1044.8  | 7.7  | 24.4    | 4.7  | 2.7     | 3.7  |
| 2-Heptanone                     | 0.0     |      | 0.0      |      | 0.0     |      | 0.0     |      | 0.0     |      |
| m-Menthane                      | 0.0     |      | 430.5    | 1.9  | 114.8   | 3.8  | 51.2    | 2.9  | 3.7     | 0.7  |
| 1,3-Diazine                     | 20.3    | 0.8  | 1092.3   | 1.4  | 1773.1  | 2.2  | 30.1    | 16.3 | 11.4    | 3.5  |
| 2-Methyl-1-Butanol              | 539.1   | 2.1  | 0.0      |      | 0.0     |      | 4223.2  | 11.6 | 18.3    | 3.3  |
| 2-Propyl-Furan                  | 15.2    | 4.3  | 72.3     | 1.2  | 296.4   | 3.1  | 31.2    | 10.1 | 8.1     | 5.8  |
| Ethyl Hexanoate                 | 0.0     |      | 0.0      |      | 0.0     |      | 0.0     |      | 0.0     |      |
| 2-Pentyl-Furan                  | 6.5     | 6.9  | 50.3     | 4.6  | 40.8    | 8.4  | 29.9    | 5.9  | 16.5    | 3.7  |

|                                                 |          |      |          |      |          |      |          |      |          |      |
|-------------------------------------------------|----------|------|----------|------|----------|------|----------|------|----------|------|
| 2-Methyl-Pyrazine                               | 0.0      |      | 1562.7   | 2.6  | 1021.2   | 10.2 | 311.1    | 5.2  | 10.2     | 7.1  |
| 2-Methyl-Dihydro-2(3H)-Furanone                 | 4119.1   | 5.3  | 2887.6   | 2.7  | 5045.5   | 9.2  | 3174.6   | 2.0  | 1562.8   | 4.8  |
| p-Cymene                                        | 5.7      | 3.2  | 0.0      |      | 0.0      |      | 0.0      |      | 0.0      |      |
| Mesitylene                                      | 3.3      | 9.8  | 0.0      |      | 0.0      |      | 0.0      |      | 0.0      |      |
| 3,5-Xylenol                                     | 10.7     | 2.7  | 0.0      |      | 0.0      |      | 0.0      |      | 0.0      |      |
| 3-Hydroxy-2-Butanone                            | 877.6    | 0.4  | 2151.9   | 1.3  | 1096.0   | 3.1  | 175.9    | 5.8  | 74.0     | 10.6 |
| Vinylene Carbonate                              | 5097.1   | 12.9 | 7713.3   | 5.4  | 7058.4   | 12.1 | 1616.0   | 1.5  | 895.7    | 13.9 |
| 2,6-Xylenol                                     | 257.1    | 7.3  | 15.5     | 2.5  | 163.2    | 3.9  | 14.6     | 0.8  | 4.7      | 12.9 |
| 1-Hydroxy-2-Propanone                           | 1597.1   | 4.2  | 15435.8  | 1.9  | 11458.2  | 2.5  | 6837.4   | 1.8  | 2665.1   | 2.2  |
| 2,5-Dimethyl-Pyrazine                           | 5.6      | 14.4 | 283.2    | 3.5  | 279.0    | 11.8 | 10.1     | 5.0  | 13.3     | 4.8  |
| 2,6-Dimethyl-Pyrazine                           | 20.8     | 8.6  | 746.4    | 5.7  | 970.8    | 6.0  | 76.0     | 6.3  | 158.7    | 5.7  |
| 2-Cyclopenten-1-one                             | 134.8    | 4.4  | 102.2    | 9.5  | 562.7    | 2.8  | 243.3    | 9.4  | 111.8    | 2.7  |
| 1,2,3,4-Tetramethyl-4-(1-methylethenyl)-Benzene | 46.6     | 4.9  | 0.0      |      | 0.0      |      | 8.9      | 3.8  | 0.0      |      |
| 2-Methyl-2-Cyclopenten-1-one                    | 284.0    | 0.2  | 282.1    | 3.7  | 403.7    | 8.9  | 28.1     | 6.4  | 17.7     | 6.0  |
| 5-Methyl-2-Furanmethanethiol                    | 230.6    | 3.8  | 2616.0   | 9.2  | 46.0     | 14.1 | 256.4    | 5.0  | 5.9      | 0.3  |
| 1-Hydroxy-2-Butanone                            | 491.1    | 2.0  | 875.1    | 1.1  | 498.9    | 10.3 | 4493.7   | 2.7  | 1818.9   | 3.2  |
| 2-Ethyl-6-Methyl-Pyrazine                       | 8.7      | 1.8  | 0.0      |      | 0.0      |      | 0.0      |      | 0.0      |      |
| 2-Ethyl-5-Methyl-Pyrazine                       | 0.0      |      | 0.0      |      | 0.0      |      | 0.0      |      | 0.0      |      |
| Nonanal                                         | 386.4    | 12.9 | 832.3    | 10.0 | 979.5    | 0.9  | 772.5    | 1.8  | 250.1    | 8.6  |
| Trimethyl-Pyrazine                              | 0.0      |      | 0.0      |      | 0.0      |      | 0.0      |      | 0.0      |      |
| 3-Ethyl-2-Methyl-1,3-Hexadiene                  | 0.0      |      | 0.0      |      | 0.0      |      | 21.4     | 11.3 | 0.0      |      |
| 2-Cyclohexen-1-one                              | 304.8    | 5.2  | 22.4     | 4.4  | 450.6    | 2.3  | 21.1     | 6.9  | 13.9     | 4.1  |
| 5-Methyl-2(3H)-Furanone                         | 1383.9   | 5.9  | 2997.1   | 10.0 | 1720.9   | 2.4  | 1401.9   | 4.4  | 346.3    | 3.2  |
| 1,3-Dihydro-4-Methyl-2H-Imidazol-2-one          | 744.5    | 4.5  | 1906.7   | 6.2  | 1821.9   | 5.3  | 350.7    | 11.7 | 453.0    | 7.1  |
| Ethyl Octanoate                                 | 0.0      |      | 0.0      |      | 0.0      |      | 0.0      |      | 0.0      |      |
| 1,2,3,4-Tetrahydro-1,1,6-Trimethyl-Naphthalene  | 1344.5   | 1.4  | 1472.8   | 9.6  | 567.4    | 10.9 | 1486.2   | 2.9  | 9.5      | 8.2  |
| Furfural                                        | 28145.9  | 9.6  | 34757.9  | 6.0  | 47378.6  | 8.3  | 36404.9  | 1.6  | 30413.7  | 2.1  |
| Ethanoic Acid                                   | 204531.3 | 8.2  | 525881.1 | 3.0  | 663791.3 | 11.5 | 265425.9 | 9.8  | 199330.3 | 9.5  |
| 1,2,3,4-Tetrahydro-1,6,8-Trimethyl-Naphthalene  | 862.1    | 1.0  | 1009.5   | 0.8  | 353.3    | 15.7 | 806.7    | 0.8  | 40.2     | 8.0  |
| 2-Ethyl-1-Hexanol                               | 451.8    | 3.3  | 786.3    | 5.0  | 327.4    | 6.2  | 300.8    | 1.9  | 297.1    | 1.6  |
| 3-Methyl-Furfural                               | 127.8    | 0.7  | 175.5    | 0.7  | 161.1    | 3.6  | 56.2     | 12.2 | 29.0     | 10.8 |
| Furfuryl Formate                                | 352.6    | 2.4  | 1135.2   | 3.4  | 980.7    | 0.4  | 734.3    | 2.1  | 300.7    | 5.5  |
| Decanal                                         | 169.1    | 2.1  | 105.9    | 5.7  | 72.1     | 2.5  | 94.9     | 8.4  | 48.1     | 4.6  |
| 1-(2-Furanyl)-Ethanone                          | 4662.3   | 3.5  | 15360.0  | 2.6  | 12957.8  | 3.1  | 12403.3  | 3.1  | 5226.3   | 4.5  |

|                                                |         |      |         |      |         |      |         |      |         |      |
|------------------------------------------------|---------|------|---------|------|---------|------|---------|------|---------|------|
| Benzaldehyde                                   | 435.4   | 2.4  | 355.7   | 13.9 | 288.3   | 16.1 | 90.9    | 6.9  | 64.0    | 8.8  |
| Furfuryl Acetate                               | 161.9   | 15.8 | 557.3   | 0.5  | 458.8   | 16.7 | 459.8   | 2.7  | 25.6    | 4.2  |
| Propanoic Acid                                 | 1074.2  | 3.7  | 1837.2  | 1.0  | 1021.4  | 4.5  | 4673.1  | 4.4  | 4153.1  | 2.2  |
| Dimethyl Sulfoxide                             | 17.9    | 11.5 | 1654.7  | 10.8 | 1739.2  | 5.4  | 420.3   | 10.3 | 50.4    | 11.1 |
| 1,2,3,4-Tetrahydro-1,5,8-Trimethyl-Naphthalene | 258.5   | 3.5  | 0.0     |      | 0.0     |      | 438.5   | 2.8  | 0.0     |      |
| 5-Methyl-Furfural                              | 6144.0  | 14.9 | 21002.4 | 3.5  | 16615.1 | 1.0  | 15673.5 | 2.9  | 10488.3 | 3.4  |
| 4-Cyclopentene-1,3-dione                       | 4236.2  | 5.6  | 6329.9  | 7.0  | 2903.8  | 14.8 | 4060.6  | 9.0  | 4194.6  | 5.9  |
| 2-Methyl-Benzofuran                            | 716.8   | 8.3  | 303.3   | 7.8  | 44.2    | 7.9  | 628.2   | 5.9  | 14.8    | 4.0  |
| 1-(5-Methyl-2-Furanyl)-Ethanone                | 388.0   | 5.3  | 1008.7  | 4.7  | 853.4   | 9.9  | 910.0   | 6.3  | 477.6   | 7.1  |
| Diethylene Glycol Ethyl Ether                  | 650.2   | 2.5  | 2312.5  | 12.3 | 3373.0  | 4.9  | 3420.0  | 6.9  | 1168.5  | 4.3  |
| 3-Methyl-Dihydro-2(3H)-Furanone                | 295.4   | 1.4  | 428.4   | 8.9  | 1144.2  | 10.5 | 393.5   | 13.1 | 1454.3  | 2.5  |
| 2,3-Dihydro-1,1,4,6-Tetramethyl-1H-Indene      | 175.8   | 5.7  | 0.0     |      | 0.0     |      | 132.6   | 1.7  | 6.2     | 12.6 |
| Benzeneacetaldehyde                            | 18.1    | 4.8  | 1667.0  | 6.8  | 2877.6  | 9.2  | 1090.0  | 9.9  | 239.3   | 14.5 |
| 3,5-Dimethyl-Dihydro-2-Furanone                | 359.6   | 6.4  | 940.5   | 10.2 | 936.1   | 10.1 | 890.8   | 1.7  | 901.1   | 3.3  |
| 2-Propenoic Acid                               | 56.0    | 10.9 | 570.0   | 5.4  | 10367.4 | 10.4 | 331.0   | 9.1  | 1014.8  | 7.8  |
| Ethyl Decanoate                                | 0.0     |      | 0.0     |      | 0.0     |      | 0.0     |      | 0.0     |      |
| Acetophenone                                   | 0.0     |      | 0.0     |      | 0.0     |      | 0.0     |      | 0.0     |      |
| 2-Furanmethanol                                | 19541.0 | 1.2  | 30165.7 | 10.0 | 24400.6 | 3.4  | 24535.3 | 1.0  | 21311.4 | 5.7  |
| 3-Furanmethanol                                | 15671.3 | 1.2  | 22768.3 | 0.5  | 25676.2 | 3.2  | 17544.2 | 1.5  | 11589.6 | 3.8  |
| 2,3-Dihydro-1,1,5,6-Tetramethyl-1H-Indene      | 479.3   | 7.2  | 1137.1  | 4.1  | 272.8   | 10.3 | 744.3   | 2.4  | 62.4    | 6.6  |
| 2-(2-Furanylmethyl)-5-Methyl-Furan             | 0.0     |      | 0.0     |      | 0.0     |      | 12.7    | 8.1  | 0.0     |      |
| 3-Methyl-2(5H)-Furanone                        | 103.2   | 5.2  | 836.5   | 5.2  | 848.2   | 1.0  | 192.6   | 6.6  | 147.3   | 2.7  |
| 5-Methyl-2-Furanmethanol                       | 787.7   | 8.1  | 2193.5  | 7.6  | 0.0     |      | 727.6   | 8.9  | 404.8   | 2.6  |
| Benzyl Acetate                                 | 0.0     |      | 0.0     |      | 0.0     |      | 0.0     |      | 0.0     |      |
| 2(5H)-Furanone                                 | 4156.5  | 11.6 | 12488.8 | 5.9  | 7932.5  | 4.5  | 4913.4  | 2.2  | 3494.8  | 9.4  |
| 2,2'-Methylenebis[5-Methyl-Furan               | 49.5    | 0.1  | 124.6   | 6.5  | 85.3    | 3.1  | 86.4    | 14.5 | 6.6     | 10.5 |
| 1,2-Cyclopentanedione                          | 18344.3 | 4.1  | 22941.3 | 13.5 | 24973.7 | 4.5  | 18434.2 | 1.8  | 16030.2 | 5.5  |
| 2-Cyclohexenol                                 | 704.8   | 0.6  | 5050.5  | 6.3  | 4231.7  | 6.7  | 3208.6  | 8.6  | 1076.5  | 3.3  |
| 2-Phenylethyl Acetate                          | 109.0   | 5.1  | 12084.7 | 4.0  | 33.9    | 10.7 | 1504.0  | 1.4  | 6.1     | 3.6  |
| 3-Methyl-1,2-Cyclopentanedione                 | 3391.4  | 2.1  | 7922.6  | 3.1  | 6026.4  | 3.7  | 3696.0  | 11.0 | 2952.7  | 9.4  |
| 2-Ethyl-Hexanoic Acid                          | 0.0     |      | 1171.3  | 0.0  | 1670.2  | 12.7 | 2260.1  | 9.0  | 502.2   | 6.9  |
| β-Damascenone                                  | 478.2   | 3.5  | 983.0   | 2.1  | 456.9   | 6.1  | 391.3   | 2.3  | 21.7    | 7.7  |
| Ethyl Undecanoate                              | 0.0     |      | 0.0     |      | 0.0     |      | 0.0     |      | 0.0     |      |
| 2-Methyl-Propanoic Acid                        | 676.0   | 1.1  | 5280.0  | 8.8  | 5265.2  | 8.9  | 1107.0  | 1.1  | 111.6   | 0.7  |

|                                       |          |      |          |      |          |      |          |      |          |      |
|---------------------------------------|----------|------|----------|------|----------|------|----------|------|----------|------|
| 2,4,6-Trihydroxypyrimidine            | 164.2    | 10.9 | 377.1    | 8.3  | 396.7    | 4.1  | 111.6    | 9.5  | 91.4     | 1.7  |
| Mequinol                              | 744.8    | 3.0  | 1490.0   | 1.8  | 152.6    | 8.6  | 377.9    | 2.3  | 117.5    | 6.1  |
| 2,2-Diethyl-3-Methyl-Oxazolidine      | 908.3    | 3.2  | 6727.0   | 2.0  | 5941.0   | 4.4  | 317.1    | 6.0  | 1502.5   | 7.2  |
| Oxypurinol                            | 499.4    | 4.4  | 5320.4   | 10.7 | 4183.2   | 5.7  | 3530.7   | 9.5  | 2274.8   | 14.4 |
| Benzenemethanol                       | 21.9     | 13.8 | 84.0     | 2.2  | 97.4     | 10.4 | 43.1     | 9.6  | 67.9     | 7.0  |
| 4-Methyl-2(5H)-Furanone               | 428.4    | 10.0 | 968.8    | 6.4  | 1466.7   | 4.0  | 1025.2   | 3.4  | 529.3    | 14.3 |
| 3-Ethyl-2-Hydroxy-2-Cyclopenten-1-one | 19.0     | 5.6  | 98.8     | 4.7  | 966.2    | 7.9  | 958.3    | 5.4  | 669.3    | 6.6  |
| Benzenethanol                         | 867.2    | 1.4  | 1760.5   | 3.0  | 213.9    | 4.0  | 122.3    | 4.2  | 110.2    | 9.1  |
| Acrylamide                            | 22.0     | 6.8  | 4884.7   | 2.8  | 1039.9   | 2.1  | 163.4    | 1.4  | 496.7    | 7.9  |
| Erythritol                            | 1691.9   | 3.3  | 3848.6   | 3.7  | 7592.8   | 0.4  | 310.8    | 1.8  | 841.8    | 5.3  |
| 2,3-Dimethyl-3-Pyrazolin-5-one        | 0.0      |      | 605.2    | 6.9  | 596.9    | 6.1  | 195.9    | 4.5  | 23.9     | 12.9 |
| Furfural Acetone                      | 220.6    | 6.6  | 264.0    | 11.8 | 317.1    | 1.7  | 325.3    | 2.2  | 152.9    | 2.1  |
| Cyclotene                             | 368.6    | 0.7  | 2140.8   | 8.8  | 1375.6   | 6.0  | 222.2    | 5.1  | 206.9    | 6.4  |
| 2-Methyl-1,4-Benzenediol              | 201.9    | 5.8  | 912.0    | 6.3  | 1676.9   | 2.5  | 360.4    | 10.7 | 451.4    | 5.4  |
| Heptanoic Acid                        | 0.0      |      | 0.0      |      | 0.0      |      | 0.0      |      | 118.9    | 8.9  |
| Maltol                                | 2927.0   | 9.4  | 9132.6   | 1.6  | 9095.6   | 0.3  | 8504.1   | 11.0 | 5157.7   | 9.6  |
| 2-Acetylpyrrole                       | 2100.4   | 5.8  | 3804.0   | 8.1  | 3154.5   | 11.5 | 2493.3   | 7.5  | 699.1    | 6.2  |
| 2,5-Furandicarboxaldehyde             | 2058.9   | 8.5  | 7971.6   | 1.2  | 10350.8  | 1.4  | 7332.6   | 5.8  | 3450.5   | 14.0 |
| 2H-Pyran-2,6(3H)-Dione                | 2561.5   | 7.3  | 7322.9   | 4.9  | 6084.3   | 5.7  | 4069.1   | 6.6  | 3737.3   | 3.7  |
| 1-(2-Furyl)-2-Hydroxy-Ethanone        | 7511.3   | 9.9  | 28156.8  | 10.3 | 21112.8  | 3.2  | 8488.0   | 7.6  | 6400.2   | 2.0  |
| Phenol                                | 2100.0   | 7.3  | 4499.7   | 6.3  | 2457.0   | 8.1  | 3237.9   | 13.7 | 1658.8   | 11.1 |
| 1H-Pyrrole-2-Carboxaldehyde           | 369.0    | 9.2  | 1012.2   | 2.7  | 1899.6   | 3.1  | 429.6    | 11.1 | 275.4    | 2.3  |
| Phloroglucinol                        | 1682.2   | 5.4  | 7709.9   | 10.4 | 6758.4   | 11.5 | 1843.9   | 2.9  | 201.2    | 4.9  |
| Furaneol                              | 10011.8  | 6.9  | 14041.5  | 7.4  | 14676.6  | 1.4  | 10283.5  | 3.7  | 9742.6   | 8.3  |
| Octanoic Acid                         | 0.0      |      | 0.0      |      | 0.0      |      | 0.0      |      | 0.0      |      |
| 5-Acetyl-Dihydro-2(3H)-Furanone       | 8964.3   | 6.8  | 12269.9  | 7.1  | 12879.9  | 13.8 | 7160.2   | 3.1  | 6083.8   | 9.7  |
| 2-Furanpropionic Acid                 | 2146.9   | 9.7  | 4652.1   | 4.9  | 4047.3   | 3.9  | 2263.1   | 3.5  | 1877.3   | 6.6  |
| 1,3-Dihydroxy-2-Propanone             | 471324.1 | 1.0  | 585026.4 | 1.2  | 882133.4 | 9.8  | 516521.2 | 10.8 | 413356.1 | 5.7  |
| Tetrahydro-5-Methyl-2-Furanmethanol   | 16541.6  | 1.9  | 24267.4  | 2.3  | 27213.4  | 7.3  | 22737.9  | 0.4  | 14263.5  | 3.6  |
| 4,5-Dimethyl Vinylene Carbonate       | 4719.2   | 0.1  | 17222.0  | 7.8  | 15798.9  | 1.7  | 1529.8   | 13.5 | 4095.9   | 2.3  |
| 2-Hydroxy-Dihydro-2(3H)-Furanone      | 29797.0  | 5.7  | 33121.2  | 4.6  | 28324.7  | 7.0  | 28439.7  | 4.8  | 20712.5  | 7.3  |
| 5-Acetoxyethyl-2-Furfural A           | 3560.9   | 7.8  | 14316.1  | 5.9  | 14914.9  | 4.2  | 7232.0   | 6.4  | 4774.4   | 6.4  |
| 5-Acetoxyethyl-2-Furfural B           | 5073.6   | 7.6  | 14739.2  | 2.5  | 15041.5  | 6.0  | 8248.8   | 5.0  | 5347.4   | 3.8  |
| 2-Methoxy-4-Vinyl-Phenol              | 455.4    | 4.9  | 1360.7   | 5.7  | 1262.1   | 6.7  | 590.6    | 0.9  | 169.7    | 7.0  |

|                                           |          |      |          |      |          |      |          |      |          |      |
|-------------------------------------------|----------|------|----------|------|----------|------|----------|------|----------|------|
| 3-Methyl-2,4(3H,5H)-Furandione            | 1624.7   | 1.5  | 2817.9   | 7.2  | 2723.2   | 0.8  | 1514.2   | 6.3  | 1344.5   | 2.0  |
| 3-Hydroxy-2,3-Dihydro-Maltol              | 8759.9   | 3.0  | 13181.7  | 14.5 | 5983.6   | 0.7  | 25737.7  | 2.8  | 19949.5  | 13.1 |
| Decanoic Acid                             | 607.5    | 3.8  | 1436.8   | 8.5  | 1303.6   | 7.0  | 0.0      |      | 0.0      |      |
| 5-Hydroxy-Maltol                          | 7607.8   | 11.9 | 14293.3  | 6.2  | 27699.0  | 8.1  | 9341.8   | 1.0  | 2268.1   | 10.2 |
| 2,3-Dihydro-Benzofuran                    | 675.6    | 6.0  | 1714.6   | 9.2  | 1933.1   | 5.5  | 837.0    | 2.9  | 599.6    | 4.9  |
| 1,4:3,6-Dianhydro-.alpha.-d-Glucopyranose | 3672.3   | 9.4  | 4346.6   | 8.3  | 6253.6   | 8.1  | 3581.6   | 4.0  | 1960.6   | 1.3  |
| 4-Pyridinol                               | 419.3    | 6.9  | 926.0    | 3.6  | 662.8    | 12.6 | 388.8    | 2.9  | 143.7    | 4.0  |
| 4-Amino-Phenol                            | 122.9    | 8.1  | 7602.0   | 7.3  | 6263.4   | 2.8  | 844.7    | 3.6  | 596.1    | 3.6  |
| Benzoic Acid                              | 435.2    | 1.1  | 1196.7   | 1.8  | 1773.2   | 3.9  | 128.6    | 5.4  | 253.7    | 12.6 |
| Dimethylhydrazone 3-Pentanone             | 5390.8   | 4.9  | 18281.5  | 6.4  | 17348.6  | 9.5  | 4562.2   | 4.2  | 3431.6   | 11.6 |
| Undecanoic Acid                           | 0.0      |      | 2459.5   | 3.6  | 1318.0   | 4.7  | 230.9    | 2.3  | 220.9    | 11.6 |
| 5-(Hydroxymethyl)-Dihydro-2(3H)-Furanone  | 26678.3  | 13.4 | 33530.5  | 8.4  | 32799.5  | 9.7  | 24323.9  | 10.2 | 17277.8  | 5.3  |
| Dodecanoic Acid                           | 0.0      |      | 0.0      |      | 0.0      |      | 0.0      |      | 0.0      |      |
| 5-(Hydroxymethyl)-2-Furfural              | 104330.5 | 3.7  | 178324.6 | 6.0  | 228281.1 | 2.1  | 188304.0 | 0.5  | 161590.9 | 5.2  |
| 3-Methoxy-1,2-Benzenediol                 | 56.1     | 3.4  | 603.2    | 11.5 | 734.9    | 10.1 | 507.0    | 6.0  | 85.9     | 14.2 |
| 1-(2-Furanyl)-1,2-Ethanediol              | 21390.0  | 7.2  | 75845.7  | 14.2 | 67596.9  | 11.9 | 483.7    | 12.4 | 19537.8  | 6.0  |
| 4-Hydroxy-Dihydro-2(3H)-Furanone          | 30763.5  | 5.0  | 17737.7  | 9.7  | 15722.5  | 11.0 | 35188.3  | 8.4  | 4367.2   | 3.3  |

<sup>1</sup>RSD - Relative Standard Deviation values.

**Table S3D.** Mean and relative standard deviation values of identified VOCs in sugarcane-based syrups samples from STH group.

| Volatile Organic Compound | Relative Peak Areas (x 10 <sup>3</sup> ) |         |         |         |         |         |
|---------------------------|------------------------------------------|---------|---------|---------|---------|---------|
|                           | STH                                      |         |         |         |         |         |
|                           | MCBR14                                   |         | MDBR14  |         | AUS17   |         |
|                           | Mean                                     | RSD (%) | Mean    | RSD (%) | Mean    | RSD (%) |
| Pentane                   | 286.5                                    | 7.7     | 539.5   | 2.4     | 277.5   | 5.6     |
| Hexane                    | 47.5                                     | 11.2    | 281.7   | 0.7     | 312.7   | 12.4    |
| 1,4-Pentadiene            | 39.5                                     | 7.8     | 115.9   | 4.2     | 44.4    | 1.7     |
| Methanethiol              | 124.4                                    | 5.7     | 691.5   | 1.8     | 361.8   | 5.7     |
| Ethanal                   | 1897.7                                   | 3.4     | 6446.1  | 0.8     | 4042.1  | 8.8     |
| Dimethyl Sulfide          | 293.9                                    | 7.9     | 28601.0 | 2.1     | 11883.7 | 0.9     |
| Propanal                  | 420.1                                    | 2.9     | 2615.0  | 7.0     | 248.4   | 9.9     |

|                                 |         |      |         |     |         |      |
|---------------------------------|---------|------|---------|-----|---------|------|
| Furan                           | 3045.0  | 9.5  | 2846.8  | 8.0 | 6643.8  | 12.7 |
| 2-Methyl-Propanal               | 7352.8  | 6.6  | 3278.2  | 7.0 | 8446.6  | 2.9  |
| Ethyl Formate                   | 1308.1  | 4.4  | 0.0     |     | 0.0     |      |
| 2-Propenal                      | 277.3   | 5.4  | 1413.5  | 1.6 | 406.4   | 5.2  |
| 2-Methyl-Furan                  | 1572.6  | 2.9  | 5821.4  | 3.3 | 11228.2 | 2.9  |
| Ethyl Acetate                   | 731.4   | 2.8  | 54.9    | 6.2 | 92.5    | 6.1  |
| 2-Butanone                      | 351.2   | 10.3 | 1282.1  | 1.4 | 961.2   | 7.2  |
| 2-Methyl-Butanal                | 9301.9  | 10.8 | 10566.0 | 0.3 | 11345.9 | 4.5  |
| 3-Methyl-Butanal                | 4848.3  | 6.5  | 6680.9  | 4.9 | 4338.9  | 4.8  |
| Ethanol                         | 37076.6 | 5.0  | 15898.0 | 4.1 | 66393.5 | 7.7  |
| Benzene                         | 51.8    | 5.1  | 379.6   | 1.8 | 32.9    | 8.4  |
| 3-Buten-2-one                   | 893.9   | 9.3  | 4776.0  | 2.5 | 328.9   | 13.5 |
| 2,5-Dimethyl-Furan              | 2850.0  | 6.5  | 1794.1  | 4.7 | 3066.5  | 1.5  |
| Ethyl Propanoate                | 0.0     |      | 0.0     |     | 0.0     |      |
| 2,3-Butanedione                 | 10220.2 | 6.1  | 31495.0 | 2.9 | 7161.8  | 8.3  |
| 2-Methylpropyl Acetate          | 0.0     |      | 0.0     |     | 0.0     |      |
| 1-Propanol                      | 0.0     |      | 0.0     |     | 0.0     |      |
| 2-Ethyl-5-Methyl-Furan          | 418.7   | 3.7  | 413.2   | 4.6 | 363.3   | 13.5 |
| Toluene                         | 793.3   | 11.4 | 2311.5  | 7.3 | 8.2     | 2.8  |
| Ethyl Butanoate                 | 0.0     |      | 0.0     |     | 0.0     |      |
| 2-Methyl-3-Buten-2-ol           | 427.9   | 8.4  | 1880.3  | 5.1 | 0.0     |      |
| Nonomethyl Succinate            | 846.3   | 5.4  | 0.0     |     | 0.0     |      |
| 2,3-Pentanedione                | 3405.7  | 5.1  | 15461.8 | 4.9 | 1843.2  | 4.8  |
| Dimethyl Disulfide              | 0.0     |      | 0.0     |     | 1860.0  | 7.7  |
| 2-Ethenyl-Furan                 | 50.0    | 12.9 | 520.2   | 0.4 | 0.0     |      |
| 2,5-Diethyltetrahydro-Furan     | 62.5    | 11.9 | 0.0     |     | 402.3   | 11.0 |
| Hexanal                         | 0.0     |      | 8030.0  | 3.4 | 0.0     |      |
| 2-Methyl-1-Propanol             | 145.7   | 6.4  | 61.1    | 2.4 | 39.1    | 10.3 |
| 5-Butyl-Dihydro-2(3H)-Furanone  | 1125.9  | 4.4  | 22209.1 | 2.7 | 1823.3  | 4.7  |
| m-Cresol                        | 8.8     | 2.9  | 26.8    | 0.7 | 4.2     | 7.5  |
| 1-Butanol                       | 0.0     |      | 0.0     |     | 0.0     |      |
| 5-Propyl-Dihydro-2(3H)-Furanone | 47.9    | 4.6  | 18187.8 | 7.3 | 424.2   | 12.4 |
| 3-Methyl-Pyridazine             | 132.8   | 5.4  | 549.0   | 3.2 | 317.4   | 7.7  |
| 2-Heptanone                     | 0.0     |      | 0.0     |     | 0.0     |      |

|                                                 |          |      |          |     |          |      |
|-------------------------------------------------|----------|------|----------|-----|----------|------|
| m-Menthane                                      | 0.0      |      | 17.7     | 6.4 | 0.0      |      |
| 1,3-Diazine                                     | 3.4      | 4.3  | 78.9     | 4.1 | 283.9    | 8.7  |
| 2-Methyl-1-Butanol                              | 74.0     | 0.6  | 299.4    | 1.6 | 224.1    | 3.7  |
| 2-Propyl-Furan                                  | 22.8     | 12.5 | 14.0     | 2.8 | 8.6      | 9.2  |
| Ethyl Hexanoate                                 | 0.0      |      | 0.0      |     | 0.0      |      |
| 2-Pentyl-Furan                                  | 17.5     | 4.2  | 618.1    | 4.6 | 19.2     | 5.4  |
| 2-Methyl-Pyrazine                               | 0.0      |      | 18.6     | 2.0 | 2648.4   | 5.0  |
| 2-Methyl-Dihydro-2(3H)-Furanone                 | 13256.6  | 8.7  | 4917.5   | 6.2 | 11510.2  | 7.0  |
| p-Cymene                                        | 3.3      | 9.4  | 0.0      |     | 8.7      | 13.0 |
| Mesitylene                                      | 5.4      | 12.1 | 0.0      |     | 4.8      | 10.1 |
| 3,5-Xylenol                                     | 172.6    | 4.7  | 0.0      |     | 0.0      |      |
| 3-Hydroxy-2-Butanone                            | 224.2    | 10.2 | 4437.5   | 9.2 | 264.5    | 7.0  |
| Vinylene Carbonate                              | 4188.6   | 3.3  | 11592.4  | 0.9 | 2263.5   | 6.5  |
| 2,6-Xylenol                                     | 753.1    | 11.6 | 22.1     | 4.6 | 4.2      | 4.3  |
| 1-Hydroxy-2-Propanone                           | 27593.0  | 7.2  | 34460.5  | 8.8 | 2254.8   | 5.4  |
| 2,5-Dimethyl-Pyrazine                           | 95.9     | 8.7  | 14.2     | 1.3 | 2183.0   | 6.1  |
| 2,6-Dimethyl-Pyrazine                           | 96.5     | 3.6  | 108.8    | 7.3 | 2052.0   | 3.8  |
| 2-Cyclopenten-1-one                             | 948.1    | 2.9  | 12436.6  | 5.8 | 286.3    | 13.2 |
| 1,2,3,4-Tetramethyl-4-(1-methylethenyl)-Benzene | 0.0      |      | 981.3    | 0.1 | 0.0      |      |
| 2-Methyl-2-Cyclopenten-1-one                    | 136.4    | 6.6  | 1472.2   | 4.5 | 100.5    | 4.7  |
| 5-Methyl-2-Furanmethanethiol                    | 691.8    | 8.1  | 21.5     | 2.2 | 6.1      | 10.5 |
| 1-Hydroxy-2-Butanone                            | 4780.2   | 5.3  | 13379.9  | 6.4 | 407.8    | 8.7  |
| 2-Ethyl-6-Methyl-Pyrazine                       | 5.0      | 4.1  | 0.0      |     | 965.4    | 2.1  |
| 2-Ethyl-5-Methyl-Pyrazine                       | 0.0      |      | 0.0      |     | 411.2    | 4.6  |
| Nonanal                                         | 719.0    | 3.9  | 465.4    | 2.4 | 57.0     | 6.2  |
| Trimethyl-Pyrazine                              | 0.0      |      | 0.0      |     | 349.3    | 3.5  |
| 3-Ethyl-2-Methyl-1,3-Hexadiene                  | 0.0      |      | 878.3    | 1.6 | 0.0      |      |
| 2-Cyclohexen-1-one                              | 17.3     | 9.0  | 9266.3   | 1.0 | 6.3      | 8.6  |
| 5-Methyl-2(3H)-Furanone                         | 1350.1   | 4.6  | 4675.6   | 2.9 | 1065.0   | 10.8 |
| 1,3-Dihydro-4-Methyl-2H-Imidazol-2-one          | 1133.2   | 10.6 | 5605.2   | 2.2 | 580.6    | 6.8  |
| Ethyl Octanoate                                 | 0.0      |      | 0.0      |     | 0.0      |      |
| 1,2,3,4-Tetrahydro-1,1,6-Trimethyl-Naphthalene  | 453.6    | 3.8  | 7118.8   | 4.0 | 65.6     | 6.8  |
| Furfural                                        | 32710.8  | 10.8 | 29394.4  | 6.9 | 28442.4  | 9.5  |
| Ethanoic Acid                                   | 331784.7 | 1.1  | 458847.3 | 0.7 | 258647.0 | 6.3  |

|                                                |         |      |         |     |         |      |
|------------------------------------------------|---------|------|---------|-----|---------|------|
| 1,2,3,4-Tetrahydro-1,6,8-Trimethyl-Naphthalene | 2291.4  | 9.3  | 5266.4  | 0.3 | 207.0   | 12.1 |
| 2-Ethyl-1-Hexanol                              | 780.9   | 7.3  | 1378.2  | 5.4 | 528.5   | 8.4  |
| 3-Methyl-Furfural                              | 132.4   | 12.0 | 351.1   | 1.2 | 42.3    | 1.2  |
| Furfuryl Formate                               | 656.1   | 8.4  | 657.3   | 1.5 | 253.3   | 7.8  |
| Decanal                                        | 98.4    | 7.0  | 136.0   | 1.8 | 129.9   | 9.5  |
| 1-(2-Furanyl)-Ethanone                         | 8719.1  | 11.3 | 13854.3 | 2.4 | 1157.4  | 7.3  |
| Benzaldehyde                                   | 19.2    | 9.3  | 11608.6 | 3.7 | 34.5    | 10.5 |
| Furfuryl Acetate                               | 533.8   | 4.4  | 778.7   | 3.5 | 295.2   | 3.8  |
| Propanoic Acid                                 | 4814.3  | 7.2  | 10580.2 | 2.3 | 53.1    | 1.9  |
| Dimethyl Sulfoxide                             | 77.5    | 9.1  | 1709.4  | 2.0 | 114.7   | 8.7  |
| 1,2,3,4-Tetrahydro-1,5,8-Trimethyl-Naphthalene | 102.5   | 9.8  | 1546.0  | 1.4 | 0.0     |      |
| 5-Methyl-Furfural                              | 10730.2 | 10.0 | 7039.8  | 9.9 | 6260.5  | 7.0  |
| 4-Cyclopentene-1,3-dione                       | 7077.1  | 5.2  | 13667.6 | 5.4 | 1381.5  | 3.4  |
| 2-Methyl-Benzofuran                            | 187.9   | 4.4  | 610.9   | 0.3 | 89.4    | 9.3  |
| 1-(5-Methyl-2-Furanyl)-Ethanone                | 420.3   | 12.6 | 968.9   | 3.5 | 550.4   | 6.3  |
| Diethylene Glycol Ethyl Ether                  | 3573.1  | 10.0 | 264.1   | 9.2 | 410.6   | 10.7 |
| 3-Methyl-Dihydro-2(3H)-Furanone                | 1240.4  | 6.4  | 4245.1  | 1.1 | 470.8   | 7.9  |
| 2,3-Dihydro-1,1,4,6-Tetramethyl-1H-Indene      | 643.2   | 6.9  | 1438.7  | 6.0 | 27.4    | 5.2  |
| Benzeneacetaldehyde                            | 207.9   | 13.1 | 902.7   | 3.5 | 216.9   | 4.0  |
| 3,5-Dimethyl-Dihydro-2-Furanone                | 1106.4  | 11.2 | 3943.8  | 1.5 | 1103.7  | 7.6  |
| 2-Propenoic Acid                               | 4715.6  | 9.6  | 8655.5  | 6.1 | 67.2    | 9.9  |
| Ethyl Decanoate                                | 0.0     |      | 0.0     |     | 0.0     |      |
| Acetophenone                                   | 0.0     |      | 516.3   | 1.2 | 0.0     |      |
| 2-Furanmethanol                                | 40480.6 | 8.3  | 20947.7 | 3.2 | 19671.2 | 3.9  |
| 3-Furanmethanol                                | 41382.7 | 9.9  | 20633.1 | 0.6 | 12577.1 | 7.5  |
| 2,3-Dihydro-1,1,5,6-Tetramethyl-1H-Indene      | 2190.9  | 4.7  | 5077.2  | 2.6 | 145.0   | 7.1  |
| 2-(2-Furanylmethyl)-5-Methyl-Furan             | 8.5     | 5.4  | 4.2     | 5.1 | 0.0     |      |
| 3-Methyl-2(5H)-Furanone                        | 368.3   | 9.3  | 2167.0  | 2.2 | 155.9   | 5.2  |
| 5-Methyl-2-Furanmethanol                       | 1066.8  | 6.5  | 3940.1  | 2.7 | 1573.3  | 9.8  |
| Benzyl Acetate                                 | 4.4     | 3.5  | 0.0     |     | 0.0     |      |
| 2(5H)-Furanone                                 | 7639.9  | 12.0 | 27146.8 | 2.2 | 2958.0  | 6.8  |
| 2,2'-Methylenebis[5-Methyl-Furan               | 353.2   | 6.8  | 42.5    | 4.1 | 26.8    | 11.3 |
| 1,2-Cyclopentanedione                          | 32232.0 | 2.8  | 27157.7 | 8.4 | 11403.5 | 4.7  |
| 2-Cyclohexenol                                 | 3243.0  | 3.0  | 4990.1  | 2.9 | 2575.8  | 11.4 |

|                                       |          |      |          |      |          |      |
|---------------------------------------|----------|------|----------|------|----------|------|
| 2-Phenylethyl Acetate                 | 0.0      |      | 0.0      |      | 22.8     | 2.6  |
| 3-Methyl-1,2-Cyclopentanedione        | 5183.4   | 10.2 | 24172.1  | 4.0  | 3155.1   | 8.4  |
| 2-Ethyl-Hexanoic Acid                 | 0.0      |      | 1114.6   | 0.2  | 0.0      |      |
| β-Damascenone                         | 966.1    | 5.8  | 1997.2   | 2.0  | 1365.1   | 10.4 |
| Ethyl Undecanoate                     | 1151.6   | 2.2  | 0.0      |      | 0.0      |      |
| 2-Methyl-Propanoic Acid               | 2824.1   | 12.4 | 26647.2  | 2.8  | 662.9    | 3.3  |
| 2,4,6-Trihydroxypyrimidine            | 153.7    | 3.1  | 789.7    | 2.0  | 208.9    | 6.9  |
| Mequinol                              | 132.2    | 9.0  | 274.1    | 1.7  | 1272.9   | 0.4  |
| 2,2-Diethyl-3-Methyl-Oxazolidine      | 2313.4   | 7.9  | 1732.9   | 1.3  | 81.6     | 10.7 |
| Oxypurinol                            | 3634.0   | 10.6 | 2952.8   | 9.9  | 791.4    | 6.9  |
| Benzenemethanol                       | 73.9     | 13.5 | 236.9    | 1.6  | 28.0     | 5.5  |
| 4-Methyl-2(5H)-Furanone               | 607.9    | 3.8  | 4930.2   | 6.6  | 1099.4   | 4.5  |
| 3-Ethyl-2-Hydroxy-2-Cyclopenten-1-one | 692.8    | 4.9  | 6840.8   | 0.9  | 252.5    | 11.9 |
| Benzeneethanol                        | 602.9    | 3.0  | 315.8    | 0.6  | 66.0     | 9.0  |
| Acrylamide                            | 54.9     | 1.1  | 437.1    | 4.5  | 364.5    | 16.9 |
| Erythritol                            | 2087.8   | 3.0  | 34108.0  | 0.7  | 178.0    | 3.6  |
| 2,3-Dimethyl-3-Pyrazolin-5-one        | 0.0      |      | 1329.4   | 4.3  | 29.4     | 15.2 |
| Furfural Acetone                      | 278.8    | 11.4 | 670.7    | 1.3  | 186.9    | 4.4  |
| Cyclotene                             | 881.6    | 5.4  | 3771.7   | 8.6  | 40.5     | 3.6  |
| 2-Methyl-1,4-Benzenediol              | 738.3    | 8.8  | 576.5    | 5.2  | 305.6    | 8.3  |
| Heptanoic Acid                        | 0.0      |      | 1995.1   | 5.1  | 0.0      |      |
| Maltol                                | 6016.3   | 3.9  | 4303.6   | 8.1  | 1559.3   | 1.7  |
| 2-Acetylpyrrole                       | 2384.6   | 6.5  | 618.1    | 5.7  | 1289.9   | 8.3  |
| 2,5-Furandicarboxaldehyde             | 3215.6   | 11.4 | 2408.0   | 3.1  | 2015.9   | 7.2  |
| 2H-Pyran-2,6(3H)-Dione                | 7078.0   | 4.3  | 1870.8   | 5.3  | 66.9     | 8.7  |
| 1-(2-Furanyl)-2-Hydroxy-Ethanone      | 7788.8   | 8.1  | 10007.4  | 4.8  | 2681.3   | 9.6  |
| Phenol                                | 3347.2   | 12.6 | 9421.8   | 3.7  | 2690.1   | 6.8  |
| 1H-Pyrrole-2-Carboxaldehyde           | 169.3    | 11.4 | 8401.2   | 3.5  | 667.4    | 9.0  |
| Phloroglucinol                        | 1176.9   | 4.0  | 3703.4   | 11.3 | 136.6    | 10.1 |
| Furaneol                              | 13922.3  | 6.6  | 20922.6  | 4.9  | 7929.2   | 14.2 |
| Octanoic Acid                         | 0.0      |      | 5041.2   | 7.3  | 0.0      |      |
| 5-Acetyl-Dihydro-2(3H)-Furanone       | 11221.8  | 12.1 | 17729.2  | 5.3  | 6473.0   | 12.1 |
| 2-Furanpropionic Acid                 | 2306.8   | 11.6 | 1595.6   | 6.0  | 67.6     | 4.3  |
| 1,3-Dihydroxy-2-Propanone             | 534971.4 | 10.8 | 574093.3 | 1.0  | 432035.9 | 3.6  |

|                                           |          |      |         |     |          |      |
|-------------------------------------------|----------|------|---------|-----|----------|------|
| Tetrahydro-5-Methyl-2-Furanmethanol       | 24988.6  | 4.5  | 27991.3 | 8.5 | 20.1     | 13.9 |
| 4,5-Dimethyl Vinylene Carbonate           | 9102.2   | 10.4 | 14827.7 | 0.7 | 3690.0   | 8.3  |
| 2-Hydroxy-Dihydro-2(3H)-Furanone          | 35815.5  | 4.9  | 29518.2 | 2.7 | 32920.6  | 13.8 |
| 5-Acetoxymethyl-2-Furfural A              | 5644.7   | 2.3  | 3317.1  | 6.9 | 2500.9   | 5.5  |
| 5-Acetoxymethyl-2-Furfural B              | 6605.7   | 9.8  | 6362.9  | 0.6 | 4392.0   | 10.1 |
| 2-Methoxy-4-Vinyl-Phenol                  | 1588.9   | 7.2  | 1317.5  | 3.6 | 1076.9   | 9.4  |
| 3-Methyl-2,4(3H,5H)-Furandione            | 2141.9   | 7.7  | 3997.5  | 1.3 | 1310.9   | 10.5 |
| 3-Hydroxy-2,3-Dihydro-Maltol              | 25425.9  | 2.3  | 30343.9 | 4.3 | 2150.2   | 12.4 |
| Decanoic Acid                             | 1520.2   | 7.9  | 17128.8 | 7.4 | 0.0      |      |
| 5-Hydroxy-Maltol                          | 9891.2   | 13.0 | 11660.8 | 1.4 | 103.5    | 5.8  |
| 2,3-Dihydro-Benzofuran                    | 2327.1   | 15.7 | 1721.7  | 4.1 | 2326.0   | 1.5  |
| 1,4:3,6-Dianhydro-.alpha.-d-Glucopyranose | 2470.2   | 13.4 | 9885.4  | 5.7 | 4319.2   | 14.4 |
| 4-Pyridinol                               | 212.9    | 5.0  | 524.4   | 2.6 | 643.2    | 8.5  |
| 4-Amino-Phenol                            | 1112.4   | 6.7  | 1073.4  | 2.3 | 1723.0   | 8.0  |
| Benzoic Acid                              | 207.5    | 2.2  | 49854.7 | 6.1 | 18.2     | 13.5 |
| Dimethylhydrazone 3-Pentanone             | 9050.6   | 6.1  | 6763.8  | 3.2 | 2072.0   | 9.9  |
| Undecanoic Acid                           | 0.0      |      | 0.0     |     | 0.0      |      |
| 5-(Hydroxymethyl)-Dihydro-2(3H)-Furanone  | 25179.9  | 4.4  | 27077.2 | 6.2 | 16016.6  | 3.0  |
| Dodecanoic Acid                           | 3057.4   | 6.1  | 1496.3  | 0.6 | 0.0      |      |
| 5-(Hydroxymethyl)-2-Furfural              | 166665.3 | 5.9  | 63429.4 | 7.3 | 136780.2 | 4.7  |
| 3-Methoxy-1,2-Benzenediol                 | 236.3    | 11.9 | 423.2   | 8.1 | 81.5     | 7.4  |
| 1-(2-Furanyl)-1,2-Ethanediol              | 42681.8  | 6.7  | 43532.9 | 4.9 | 23323.9  | 5.3  |
| 4-Hydroxy-Dihydro-2(3H)-Furanone          | 5502.0   | 12.2 | 12161.4 | 2.3 | 5550.6   | 5.3  |

<sup>1</sup>RSD - Relative Standard Deviation values.

**Table S4.** Mean, minimum and maximum peak area values of identified VOCs in sugarcane-based syrups samples.

| Volatile Organic Compounds | Relative Peak Areas (x 10 <sup>3</sup> ) |          |          |        |         |         |         |          |         |         |         |         |
|----------------------------|------------------------------------------|----------|----------|--------|---------|---------|---------|----------|---------|---------|---------|---------|
|                            | CERT                                     |          |          | NCERT  |         |         | MED     |          |         | STH     |         |         |
|                            | Mean                                     | Min      | Max      | Mean   | Min     | Max     | Mean    | Min      | Max     | Mean    | Min     | Max     |
| Pentane                    | 16.8                                     | 99.9     | 46.9     | 39.0   | 137.7   | 68.8    | 84.3    | 387.4    | 255.8   | 262.0   | 552.2   | 367.9   |
| Hexane                     | 60.4                                     | 265.0    | 130.5    | 69.3   | 242.9   | 139.2   | 62.8    | 483.0    | 279.9   | 42.2    | 351.4   | 214.0   |
| 1,4-Pentadiene             | 0.0                                      | 0.0      | 0.0      | 0.0    | 2.8     | 0.9     | 0.0     | 0.0      | 0.0     | 36.4    | 120.8   | 66.6    |
| Methanethiol               | 118.2                                    | 1088.5   | 345.5    | 151.8  | 514.4   | 277.7   | 15.0    | 1139.9   | 435.5   | 117.3   | 703.6   | 392.5   |
| Ethanal                    | 1703.7                                   | 13999.5  | 7444.6   | 48.1   | 10363.4 | 5020.8  | 1175.8  | 7541.0   | 3665.5  | 1833.1  | 6500.3  | 4128.6  |
| Dimethyl Sulfide           | 575.5                                    | 8188.6   | 2205.2   | 511.1  | 8414.8  | 3701.1  | 30.2    | 17048.5  | 11024.7 | 270.7   | 29191.9 | 13592.9 |
| Propanal                   | 261.2                                    | 1550.1   | 586.4    | 293.6  | 1513.2  | 854.6   | 257.6   | 1365.7   | 719.8   | 223.9   | 2797.8  | 1094.5  |
| Furan                      | 525.2                                    | 6043.5   | 2359.2   | 1964.8 | 3022.8  | 2292.8  | 554.7   | 3252.5   | 1870.1  | 2618.9  | 7488.0  | 4178.5  |
| 2-Methyl-Propanal          | 6228.8                                   | 38319.5  | 15491.3  | 6151.6 | 13601.3 | 9493.4  | 4375.9  | 11873.6  | 8056.4  | 3049.1  | 8691.3  | 6359.2  |
| Ethyl Formate              | 0.0                                      | 7519.6   | 2265.5   | 0.0    | 3467.6  | 1770.7  | 0.0     | 815.9    | 159.4   | 0.0     | 1365.4  | 436.0   |
| 2-Propenal                 | 145.2                                    | 578.2    | 323.7    | 26.0   | 561.6   | 299.1   | 38.0    | 783.2    | 369.2   | 262.2   | 1435.7  | 699.1   |
| 2-Methyl-Furan             | 624.9                                    | 7432.3   | 2883.0   | 165.7  | 2490.6  | 1591.6  | 425.0   | 5223.8   | 2028.0  | 1527.6  | 11554.7 | 6207.4  |
| Ethyl Acetate              | 267.0                                    | 25835.5  | 8965.4   | 7.2    | 21438.9 | 10134.9 | 70.5    | 9679.4   | 2234.1  | 51.5    | 752.1   | 292.9   |
| 2-Butanone                 | 189.2                                    | 4610.6   | 1104.4   | 64.1   | 594.2   | 332.8   | 187.3   | 724.3    | 395.1   | 315.0   | 1299.7  | 864.9   |
| 2-Methyl-Butanal           | 12490.3                                  | 41222.5  | 24426.1  | 8928.2 | 23464.0 | 15632.6 | 5645.1  | 14326.7  | 10378.1 | 8293.5  | 11858.9 | 10404.6 |
| 3-Methyl-Butanal           | 6399.9                                   | 47345.2  | 20221.3  | 1469.6 | 28625.9 | 12914.9 | 3153.2  | 28465.0  | 11330.5 | 4128.8  | 7007.2  | 5289.4  |
| Ethanol                    | 99041.5                                  | 217029.4 | 135755.4 | 2969.7 | 62772.1 | 36784.4 | 11808.6 | 105622.4 | 51163.9 | 15240.6 | 71477.3 | 39789.3 |
| Benzene                    | 17.1                                     | 209.1    | 98.9     | 3.4    | 123.5   | 52.7    | 44.4    | 136.1    | 67.6    | 30.1    | 386.5   | 154.8   |
| 3-Buten-2-one              | 263.5                                    | 5320.6   | 1872.2   | 41.3   | 3506.7  | 1527.3  | 43.2    | 2674.7   | 958.2   | 284.6   | 4895.1  | 1999.6  |
| 2,5-Dimethyl-Furan         | 482.8                                    | 4274.2   | 1575.0   | 83.4   | 2949.2  | 1360.3  | 136.4   | 1640.3   | 895.8   | 1709.4  | 3112.4  | 2570.2  |
| Ethyl Propanoate           | 0.0                                      | 1964.7   | 472.3    | 0.0    | 10426.2 | 3442.4  | 0.0     | 0.0      | 0.0     | 0.0     | 0.0     | 0.0     |
| 2,3-Butanedione            | 1212.6                                   | 55294.5  | 19465.7  | 196.3  | 21154.3 | 11029.1 | 1347.7  | 17963.1  | 9368.8  | 6567.0  | 32420.5 | 16292.3 |
| 2-Methylpropyl Acetate     | 0.0                                      | 0.0      | 0.0      | 0.0    | 2128.9  | 681.8   | 0.0     | 0.0      | 0.0     | 0.0     | 0.0     | 0.0     |
| 1-Propanol                 | 0.0                                      | 98.7     | 49.6     | 0.0    | 10496.4 | 3971.8  | 0.0     | 712.5    | 129.9   | 0.0     | 0.0     | 0.0     |
| 2-Ethyl-5-Methyl-Furan     | 24.6                                     | 595.7    | 234.2    | 0.0    | 746.9   | 239.6   | 7.0     | 510.3    | 176.7   | 314.3   | 434.1   | 398.4   |
| Toluene                    | 637.2                                    | 59213.8  | 12908.9  | 1145.8 | 5093.7  | 3410.6  | 19.6    | 6999.8   | 1982.7  | 8.0     | 2481.4  | 1037.7  |
| Ethyl Butanoate            | 0.0                                      | 0.0      | 0.0      | 0.0    | 1353.1  | 423.6   | 0.0     | 145.3    | 30.4    | 0.0     | 0.0     | 0.0     |
| 2-Methyl-3-Buten-2-ol      | 0.0                                      | 3196.8   | 425.2    | 0.0    | 916.1   | 286.4   | 0.0     | 0.0      | 0.0     | 0.0     | 1975.6  | 769.4   |
| Nonomethyl Succinate       | 0.0                                      | 3780.2   | 801.4    | 0.0    | 328.1   | 116.0   | 0.0     | 3212.1   | 832.8   | 0.0     | 891.8   | 282.1   |

|                                                 |         |         |         |        |         |         |        |         |        |        |         |         |
|-------------------------------------------------|---------|---------|---------|--------|---------|---------|--------|---------|--------|--------|---------|---------|
| 2,3-Pentanedione                                | 831.9   | 18346.9 | 5430.2  | 120.9  | 10026.0 | 4881.9  | 276.3  | 8295.7  | 4012.6 | 1754.0 | 16224.4 | 6903.6  |
| Dimethyl Disulfide                              | 0.0     | 325.6   | 137.1   | 0.0    | 2285.6  | 726.5   | 34.5   | 484.0   | 219.4  | 0.0    | 2002.5  | 620.0   |
| 2-Ethenyl-Furan                                 | 25.3    | 290.1   | 148.7   | 27.4   | 224.4   | 94.1    | 32.7   | 645.0   | 256.1  | 0.0    | 522.3   | 190.1   |
| 2,5-Diethyltetrahydro-Furan                     | 0.0     | 1432.1  | 176.9   | 0.0    | 231.6   | 70.1    | 0.0    | 0.0     | 0.0    | 0.0    | 446.6   | 154.9   |
| Hexanal                                         | 0.0     | 0.0     | 0.0     | 0.0    | 13.7    | 4.4     | 0.0    | 678.5   | 221.7  | 0.0    | 8303.8  | 2676.7  |
| 2-Methyl-1-Propanol                             | 0.0     | 21211.9 | 3570.4  | 7.3    | 42253.3 | 13699.9 | 13.7   | 149.0   | 59.5   | 35.1   | 155.0   | 82.0    |
| 5-Butyl-Dihydro-2(3H)-Furanone                  | 497.7   | 10094.7 | 2377.8  | 14.4   | 1199.5  | 376.1   | 6.5    | 103.0   | 59.9   | 1076.1 | 22802.6 | 8386.1  |
| m-Cresol                                        | 147.6   | 3783.7  | 1268.6  | 18.7   | 1001.3  | 379.4   | 4.5    | 385.3   | 127.6  | 3.9    | 27.0    | 13.3    |
| 1-Butanol                                       | 16.8    | 1100.7  | 254.0   | 0.0    | 1090.0  | 375.9   | 0.0    | 19.0    | 7.2    | 0.0    | 0.0     | 0.0     |
| 5-Propyl-Dihydro-2(3H)-Furanone                 | 270.6   | 2789.5  | 920.9   | 9.4    | 770.2   | 250.9   | 10.3   | 691.5   | 168.0  | 45.7   | 19515.9 | 6219.9  |
| 3-Methyl-Pyridazine                             | 1524.7  | 9115.2  | 3702.9  | 11.5   | 2551.9  | 1087.4  | 2.6    | 1125.1  | 334.7  | 125.7  | 566.4   | 333.1   |
| 2-Heptanone                                     | 0.0     | 0.0     | 0.0     | 0.0    | 8.8     | 2.9     | 0.0    | 0.0     | 0.0    | 0.0    | 0.0     | 0.0     |
| m-Menthane                                      | 3.1     | 155.7   | 38.1    | 0.0    | 0.0     | 0.0     | 0.0    | 438.5   | 120.0  | 0.0    | 18.8    | 5.9     |
| 1,3-Diazine                                     | 20.1    | 364.7   | 111.8   | 1.6    | 1036.8  | 451.5   | 11.0   | 1812.5  | 585.4  | 3.2    | 308.6   | 122.1   |
| 2-Methyl-1-Butanol                              | 0.0     | 23747.0 | 8132.2  | 888.0  | 19408.9 | 8565.2  | 0.0    | 4714.5  | 956.1  | 73.6   | 304.0   | 199.2   |
| 2-Propyl-Furan                                  | 77.2    | 3680.4  | 1146.9  | 6.8    | 566.0   | 197.1   | 7.7    | 305.4   | 84.6   | 7.8    | 25.7    | 15.1    |
| Ethyl Hexanoate                                 | 0.0     | 0.0     | 0.0     | 0.0    | 340.8   | 98.6    | 0.0    | 0.0     | 0.0    | 0.0    | 0.0     | 0.0     |
| 2-Pentyl-Furan                                  | 2.3     | 117.3   | 24.9    | 0.0    | 11.7    | 3.6     | 6.1    | 52.7    | 28.8   | 16.8   | 646.3   | 218.3   |
| 2-Methyl-Pyrazine                               | 187.8   | 2296.5  | 1017.2  | 34.1   | 1954.3  | 888.0   | 0.0    | 1603.9  | 581.1  | 0.0    | 2781.5  | 889.0   |
| 2-Methyl-Dihydro-2(3H)-Furanone                 | 10436.3 | 34517.2 | 19037.4 | 59.7   | 18762.0 | 6801.4  | 1487.6 | 5508.2  | 3357.9 | 4613.8 | 14410.4 | 9894.7  |
| p-Cymene                                        | 19.5    | 120.9   | 56.5    | 0.0    | 230.8   | 88.8    | 0.0    | 5.9     | 1.1    | 0.0    | 9.8     | 4.0     |
| Mesitylene                                      | 2.8     | 3835.9  | 499.7   | 0.0    | 120.6   | 40.2    | 0.0    | 3.6     | 0.7    | 0.0    | 6.0     | 3.4     |
| 3,5-Xylenol                                     | 43.4    | 396.3   | 167.4   | 0.0    | 89.6    | 29.5    | 0.0    | 11.0    | 2.1    | 0.0    | 180.8   | 57.5    |
| 3-Hydroxy-2-Butanone                            | 1250.4  | 5427.4  | 2817.2  | 321.1  | 1961.9  | 1001.1  | 66.2   | 2179.5  | 875.1  | 201.4  | 4844.3  | 1642.0  |
| Vinylene Carbonate                              | 3994.6  | 27223.9 | 14822.8 | 79.6   | 13224.2 | 5634.9  | 771.3  | 8132.9  | 4476.1 | 2115.9 | 11693.9 | 6014.8  |
| 2,6-Xylenol                                     | 118.1   | 1679.0  | 660.4   | 4.6    | 289.2   | 153.6   | 4.1    | 275.8   | 91.0   | 4.0    | 840.5   | 259.8   |
| 1-Hydroxy-2-Propanone                           | 5359.8  | 30542.4 | 14325.7 | 3669.8 | 21425.1 | 11092.4 | 1530.2 | 15728.7 | 7598.7 | 2133.8 | 37495.1 | 21436.1 |
| 2,5-Dimethyl-Pyrazine                           | 36.4    | 1529.7  | 579.4   | 90.2   | 133.0   | 110.3   | 4.8    | 311.8   | 118.3  | 14.0   | 2316.6  | 764.4   |
| 2,6-Dimethyl-Pyrazine                           | 1022.0  | 3449.8  | 1605.0  | 26.8   | 1510.4  | 822.4   | 19.0   | 1029.1  | 394.5  | 93.0   | 2130.2  | 752.4   |
| 2-Cyclopenten-1-one                             | 1105.5  | 5960.4  | 2661.3  | 16.6   | 1134.8  | 494.5   | 92.6   | 578.5   | 231.0  | 248.5  | 13157.0 | 4557.0  |
| 1,2,3,4-Tetramethyl-4-(1-methylethenyl)-Benzene | 0.0     | 0.0     | 0.0     | 0.0    | 0.0     | 0.0     | 0.0    | 48.9    | 11.1   | 0.0    | 981.9   | 327.1   |
| 2-Methyl-2-Cyclopenten-1-one                    | 322.9   | 2259.1  | 1160.0  | 18.3   | 436.1   | 203.4   | 16.7   | 439.7   | 203.1  | 95.7   | 1538.7  | 569.7   |
| 5-Methyl-2-Furanmethanethiol                    | 25.3    | 8606.1  | 2489.1  | 11.1   | 13804.7 | 5140.8  | 5.9    | 2855.6  | 631.0  | 5.4    | 747.5   | 239.8   |
| 1-Hydroxy-2-Butanone                            | 625.6   | 10894.9 | 4798.4  | 98.9   | 4834.4  | 2054.1  | 447.4  | 4613.5  | 1635.5 | 372.5  | 14242.7 | 6189.3  |

|                                                |         |          |          |          |          |          |          |          |          |          |          |          |
|------------------------------------------------|---------|----------|----------|----------|----------|----------|----------|----------|----------|----------|----------|----------|
| 2-Ethyl-6-Methyl-Pyrazine                      | 115.0   | 432.8    | 183.7    | 13.8     | 158.0    | 63.3     | 0.0      | 8.8      | 1.7      | 0.0      | 985.6    | 323.4    |
| 2-Ethyl-5-Methyl-Pyrazine                      | 0.0     | 0.0      | 0.0      | 0.0      | 0.0      | 0.0      | 0.0      | 0.0      | 0.0      | 0.0      | 430.0    | 137.1    |
| Nonanal                                        | 471.5   | 2652.2   | 1048.9   | 187.1    | 2195.8   | 917.8    | 228.7    | 988.4    | 644.2    | 53.5     | 746.9    | 413.8    |
| Trimethyl-Pyrazine                             | 0.0     | 0.0      | 0.0      | 0.0      | 0.0      | 0.0      | 0.0      | 0.0      | 0.0      | 0.0      | 361.6    | 116.4    |
| 3-Ethyl-2-Methyl-1,3-Hexadiene                 | 0.0     | 0.0      | 0.0      | 0.0      | 0.0      | 0.0      | 0.0      | 23.8     | 4.3      | 0.0      | 892.4    | 292.8    |
| 2-Cyclohexen-1-one                             | 8.6     | 793.4    | 212.7    | 22.9     | 109.7    | 69.1     | 13.3     | 460.8    | 162.6    | 5.7      | 9355.0   | 3096.6   |
| 5-Methyl-2(3H)-Furanone                        | 2863.0  | 13000.4  | 7643.6   | 156.9    | 4543.1   | 2074.9   | 335.2    | 3296.3   | 1570.0   | 950.3    | 4811.3   | 2363.6   |
| 1,3-Dihydro-4-Methyl-2H-Imidazol-2-one         | 1338.2  | 7356.9   | 3449.7   | 72.4     | 2446.3   | 1125.0   | 309.8    | 2025.7   | 1055.3   | 541.1    | 5730.1   | 2439.7   |
| Ethyl Octanoate                                | 0.0     | 0.0      | 0.0      | 0.0      | 1306.2   | 415.9    | 0.0      | 0.0      | 0.0      | 0.0      | 0.0      | 0.0      |
| 1,2,3,4-Tetrahydro-1,1,6-Trimethyl-Naphthalene | 15.4    | 727.2    | 324.4    | 3.1      | 117.1    | 61.8     | 8.7      | 1613.5   | 976.1    | 61.2     | 7401.7   | 2546.0   |
| Furfural                                       | 22947.6 | 41364.6  | 30033.0  | 22178.0  | 42904.6  | 30159.9  | 25433.9  | 51301.2  | 35420.2  | 25738.5  | 36254.7  | 30182.5  |
| Ethanoic Acid                                  | 63131.0 | 636409.9 | 259844.9 | 214264.9 | 439351.3 | 341352.6 | 180455.2 | 740414.3 | 371792.0 | 242461.9 | 462065.1 | 349759.6 |
| 1,2,3,4-Tetrahydro-1,6,8-Trimethyl-Naphthalene | 443.0   | 1463.8   | 738.5    | 4.8      | 370.0    | 192.5    | 37.0     | 1017.1   | 614.4    | 182.0    | 5283.0   | 2588.3   |
| 2-Ethyl-1-Hexanol                              | 344.4   | 3128.3   | 1135.9   | 63.6     | 11756.1  | 4024.1   | 292.5    | 825.8    | 432.7    | 483.9    | 1452.0   | 895.9    |
| 3-Methyl-Furfural                              | 167.8   | 909.7    | 437.5    | 218.8    | 4810.0   | 2234.7   | 25.9     | 176.8    | 109.9    | 41.8     | 355.2    | 175.3    |
| Furfuryl Formate                               | 756.1   | 4858.7   | 2427.0   | 54.6     | 1531.8   | 637.5    | 284.1    | 1173.4   | 700.7    | 233.6    | 711.3    | 522.2    |
| Decanal                                        | 74.5    | 3543.2   | 1376.0   | 76.2     | 498.9    | 227.0    | 45.9     | 172.7    | 98.0     | 91.5     | 142.1    | 121.4    |
| 1-(2-Furanyl)-Ethanone                         | 10211.4 | 17692.6  | 13246.7  | 40.4     | 16726.1  | 8782.4   | 4500.8   | 15752.8  | 10122.0  | 1073.1   | 14185.8  | 7910.3   |
| Benzaldehyde                                   | 463.1   | 1921.5   | 1087.5   | 5.3      | 1255.3   | 548.5    | 58.3     | 446.0    | 246.8    | 17.4     | 12037.0  | 3887.4   |
| Furfuryl Acetate                               | 517.7   | 3495.2   | 1799.4   | 104.1    | 962.1    | 421.3    | 24.5     | 559.9    | 332.7    | 283.9    | 805.7    | 535.9    |
| Propanoic Acid                                 | 207.0   | 7345.3   | 1616.1   | 0.0      | 7097.5   | 2632.4   | 975.2    | 4879.5   | 2551.8   | 52.0     | 10821.9  | 5149.2   |
| Dimethyl Sulfoxide                             | 43.0    | 768.2    | 381.9    | 44.4     | 350.8    | 151.0    | 15.8     | 1833.6   | 776.5    | 70.5     | 1743.1   | 633.9    |
| 1,2,3,4-Tetrahydro-1,5,8-Trimethyl-Naphthalene | 113.2   | 633.5    | 318.6    | 5.0      | 305.1    | 135.3    | 0.0      | 450.8    | 139.4    | 0.0      | 1567.4   | 549.5    |
| 5-Methyl-Furfural                              | 11661.3 | 24544.6  | 17921.8  | 359.4    | 19111.9  | 8116.8   | 5228.9   | 21728.0  | 13984.7  | 5824.5   | 11803.7  | 8010.2   |
| 4-Cyclopentene-1,3-dione                       | 11200.1 | 23433.1  | 17369.9  | 242.1    | 13012.0  | 5437.2   | 2473.2   | 6775.3   | 4345.0   | 1334.4   | 14408.7  | 7375.4   |
| 2-Methyl-Benzofuran                            | 2204.8  | 14920.2  | 7068.4   | 19.5     | 3604.7   | 1954.3   | 14.2     | 776.1    | 341.4    | 81.0     | 612.6    | 296.0    |
| 1-(5-Methyl-2-Furanyl)-Ethanone                | 499.1   | 4383.4   | 1901.4   | 103.5    | 978.6    | 449.4    | 367.3    | 1056.2   | 727.5    | 367.2    | 1003.3   | 646.5    |
| Diethylene Glycol Ethyl Ether                  | 1653.0  | 5846.8   | 3019.8   | 22.5     | 2187.8   | 1032.7   | 634.0    | 3656.2   | 2184.9   | 239.7    | 3930.2   | 1415.9   |
| 3-Methyl-Dihydro-2(3H)-Furanone                | 662.4   | 2081.1   | 1330.4   | 127.7    | 1955.1   | 826.5    | 291.4    | 1491.3   | 743.2    | 433.8    | 4291.6   | 1985.5   |
| 2,3-Dihydro-1,1,4,6-Tetramethyl-1H-Indene      | 29.4    | 136.5    | 68.8     | 0.0      | 0.0      | 0.0      | 0.0      | 185.8    | 62.9     | 25.9     | 1524.8   | 703.1    |
| Benzeneacetaldehyde                            | 726.6   | 19142.8  | 7726.2   | 92.0     | 5877.1   | 2014.1   | 17.3     | 3141.0   | 1178.4   | 180.7    | 934.2    | 442.5    |
| 3,5-Dimethyl-Dihydro-2-Furanone                | 425.6   | 3416.5   | 1287.3   | 396.9    | 17618.1  | 5820.0   | 336.7    | 1036.6   | 805.6    | 982.3    | 4002.7   | 2051.3   |

|                                           |         |         |         |         |         |         |         |         |         |         |         |         |
|-------------------------------------------|---------|---------|---------|---------|---------|---------|---------|---------|---------|---------|---------|---------|
| 2-Propenoic Acid                          | 40.1    | 13502.8 | 5851.7  | 825.5   | 8050.9  | 3329.4  | 49.9    | 11447.5 | 2467.8  | 60.5    | 9187.0  | 4479.4  |
| Ethyl Decanoate                           | 0.0     | 0.0     | 0.0     | 0.0     | 2326.1  | 750.6   | 0.0     | 0.0     | 0.0     | 0.0     | 0.0     | 0.0     |
| Acetophenone                              | 107.9   | 884.9   | 344.0   | 0.0     | 0.0     | 0.0     | 0.0     | 0.0     | 0.0     | 0.0     | 522.5   | 172.1   |
| 2-Furanmethanol                           | 18118.3 | 56912.8 | 27308.2 | 21939.2 | 29450.6 | 25539.9 | 19309.6 | 33178.7 | 23990.8 | 18906.9 | 43825.7 | 27033.1 |
| 3-Furanmethanol                           | 15255.1 | 68830.6 | 33416.9 | 29472.8 | 39746.2 | 33933.0 | 11151.0 | 26502.6 | 18649.9 | 11628.5 | 45494.0 | 24864.3 |
| 2,3-Dihydro-1,1,5,6-Tetramethyl-1H-Indene | 82.7    | 570.6   | 306.8   | 0.0     | 298.8   | 101.5   | 58.2    | 1183.9  | 539.2   | 134.7   | 5207.1  | 2471.1  |
| 2-(2-Furanylmethyl)-5-Methyl-Furan        | 111.6   | 1122.5  | 531.9   | 0.0     | 21.5    | 11.6    | 0.0     | 13.7    | 2.5     | 0.0     | 9.0     | 4.2     |
| 3-Methyl-2(5H)-Furanone                   | 246.7   | 1021.2  | 668.3   | 100.9   | 748.6   | 392.7   | 97.8    | 879.8   | 425.6   | 147.9   | 2215.4  | 897.1   |
| 5-Methyl-2-Furanmethanol                  | 1243.5  | 6078.3  | 3056.2  | 154.7   | 1767.5  | 1149.8  | 0.0     | 2360.1  | 822.7   | 997.0   | 4046.3  | 2193.4  |
| Benzyl Acetate                            | 0.0     | 394.8   | 203.6   | 13.7    | 2072.9  | 690.1   | 0.0     | 0.0     | 0.0     | 0.0     | 4.6     | 1.5     |
| 2(5H)-Furanone                            | 7621.7  | 38051.3 | 21720.5 | 4133.1  | 18361.9 | 10541.1 | 3165.6  | 13227.8 | 6597.2  | 2757.0  | 27733.0 | 12581.6 |
| 2,2'-Methylenebis[5-Methyl-Furan          | 292.6   | 1584.4  | 729.4   | 7.7     | 370.0   | 169.5   | 5.9     | 132.7   | 70.5    | 23.8    | 377.2   | 140.9   |
| 1,2-Cyclopentanedione                     | 14388.7 | 42812.3 | 29007.4 | 583.7   | 25973.6 | 12616.9 | 15152.4 | 26088.5 | 20144.7 | 10871.3 | 33119.7 | 23597.7 |
| 2-Cyclohexenol                            | 5070.0  | 18808.9 | 11409.9 | 161.8   | 7349.5  | 3108.9  | 700.4   | 5371.1  | 2854.4  | 2282.9  | 5136.6  | 3603.0  |
| 2-Phenylethyl Acetate                     | 346.7   | 6315.9  | 2050.6  | 12.0    | 9227.2  | 3215.8  | 5.9     | 12566.9 | 2747.5  | 0.0     | 23.4    | 7.6     |
| 3-Methyl-1,2-Cyclopentanedione            | 6163.4  | 27187.7 | 14228.9 | 121.0   | 9928.3  | 4382.5  | 2675.4  | 8165.4  | 4797.8  | 2890.3  | 25139.6 | 10836.9 |
| 2-Ethyl-Hexanoic Acid                     | 0.0     | 0.0     | 0.0     | 0.0     | 0.0     | 0.0     | 0.0     | 2464.6  | 1120.8  | 0.0     | 1117.2  | 371.5   |
| β-Damascenone                             | 195.2   | 11239.0 | 3725.2  | 314.9   | 1874.2  | 848.0   | 20.0    | 1003.5  | 466.2   | 910.5   | 2036.5  | 1442.8  |
| Ethyl Undecanoate                         | 0.0     | 0.0     | 0.0     | 0.0     | 4584.4  | 1465.6  | 0.0     | 0.0     | 0.0     | 0.0     | 1177.4  | 383.9   |
| 2-Methyl-Propanoic Acid                   | 2174.0  | 13352.8 | 6316.8  | 183.5   | 7906.7  | 3655.6  | 110.8   | 5747.2  | 2487.9  | 641.2   | 27382.6 | 10044.7 |
| 2,4,6-Trihydroxypyrimidine                | 16209.4 | 34488.3 | 23333.6 | 105.2   | 209.3   | 136.4   | 89.8    | 413.0   | 228.2   | 149.0   | 805.3   | 384.1   |
| Mequinol                                  | 539.1   | 3372.2  | 1440.6  | 82.3    | 1103.5  | 584.9   | 110.4   | 1517.0  | 576.6   | 120.3   | 1277.9  | 559.7   |
| 2,2-Diethyl-3-Methyl-Oxazolidine          | 1957.4  | 14005.0 | 6563.0  | 13.9    | 7309.8  | 2907.1  | 298.1   | 6861.3  | 3079.2  | 72.9    | 2497.2  | 1376.0  |
| Oxypurinol                                | 4387.7  | 15475.8 | 9210.9  | 86.1    | 6130.5  | 2566.2  | 477.5   | 5888.6  | 3161.7  | 736.5   | 4018.5  | 2459.4  |
| Benzenemethanol                           | 235.8   | 10917.3 | 2000.8  | 89.9    | 6338.7  | 2281.9  | 18.9    | 107.6   | 62.9    | 26.5    | 240.7   | 112.9   |
| 4-Methyl-2(5H)-Furanone                   | 1403.4  | 7690.9  | 3718.5  | 172.2   | 1659.3  | 680.8   | 385.5   | 1525.8  | 883.7   | 584.6   | 5255.1  | 2212.5  |
| 3-Ethyl-2-Hydroxy-2-Cyclopenten-1-one     | 858.6   | 7308.4  | 2738.3  | 52.6    | 150.8   | 87.9    | 18.0    | 1042.9  | 542.3   | 222.5   | 6902.3  | 2595.4  |
| Benzeneethanol                            | 53.3    | 522.9   | 225.0   | 18.5    | 3986.0  | 1397.0  | 100.2   | 1812.8  | 614.8   | 60.1    | 621.0   | 328.2   |
| Acrylamide                                | 1148.6  | 7504.0  | 4439.0  | 149.8   | 4972.6  | 1789.9  | 20.5    | 5020.1  | 1321.4  | 54.3    | 456.9   | 285.5   |
| Erythritol                                | 3583.0  | 18880.0 | 9237.9  | 156.4   | 11885.3 | 5262.1  | 305.2   | 7624.6  | 2857.2  | 171.5   | 34330.0 | 12124.6 |
| 2,3-Dimethyl-3-Pyrazolin-5-one            | 501.9   | 2303.3  | 1283.1  | 227.6   | 965.4   | 525.8   | 0.0     | 646.9   | 284.4   | 0.0     | 1386.7  | 452.9   |
| Furfural Acetone                          | 455.0   | 2233.9  | 1191.5  | 23.4    | 700.5   | 327.0   | 149.7   | 332.3   | 256.0   | 178.6   | 679.4   | 378.8   |
| Cyclotene                                 | 1418.7  | 8271.0  | 4290.3  | 33.5    | 2469.2  | 1134.9  | 193.6   | 2328.4  | 862.8   | 39.1    | 4095.2  | 1564.6  |

|                                           |          |          |          |          |          |          |          |          |          |          |          |          |
|-------------------------------------------|----------|----------|----------|----------|----------|----------|----------|----------|----------|----------|----------|----------|
| 2-Methyl-1,4-Benzenediol                  | 865.7    | 10124.3  | 3443.8   | 49.1     | 2852.0   | 1109.2   | 190.2    | 1719.6   | 720.5    | 280.2    | 803.1    | 540.1    |
| Heptanoic Acid                            | 0.0      | 0.0      | 0.0      | 0.0      | 0.0      | 0.0      | 0.0      | 129.5    | 23.8     | 0.0      | 2097.7   | 665.0    |
| Maltol                                    | 7069.3   | 25568.3  | 15486.6  | 450.4    | 19398.6  | 7637.0   | 2651.9   | 9435.4   | 6963.4   | 1533.1   | 6249.6   | 3959.7   |
| 2-Acetylpyrrole                           | 6981.8   | 31047.7  | 12772.3  | 160.6    | 13478.9  | 6275.4   | 655.7    | 4113.7   | 2450.3   | 582.9    | 2540.4   | 1430.9   |
| 2,5-Furandicarboxaldehyde                 | 10985.7  | 48056.4  | 24639.8  | 191.0    | 11443.4  | 4255.9   | 1884.8   | 10496.9  | 6232.9   | 1871.2   | 3581.0   | 2546.5   |
| 2H-Pyran-2,6(3H)-Dione                    | 1900.4   | 17495.8  | 10140.6  | 365.4    | 8890.3   | 4313.2   | 2375.4   | 7681.1   | 4755.0   | 61.0     | 7382.9   | 3005.2   |
| 1-(2-Furanyl)-2-Hydroxy-Ethanone          | 11782.3  | 57616.5  | 26518.6  | 269.4    | 22036.7  | 10363.2  | 6271.4   | 31068.2  | 14333.8  | 2423.6   | 10484.3  | 6825.8   |
| Phenol                                    | 1793.7   | 12809.3  | 5289.8   | 232.3    | 3267.5   | 1549.6   | 1474.3   | 4781.3   | 2790.7   | 2507.7   | 9774.6   | 5153.0   |
| 1H-Pyrrole-2-Carboxaldehyde               | 599.2    | 6263.3   | 2929.6   | 263.4    | 776.2    | 500.3    | 269.1    | 1957.7   | 797.1    | 150.0    | 8692.2   | 3079.3   |
| Phloroglucinol                            | 2419.3   | 17924.6  | 9850.4   | 184.7    | 12170.1  | 5032.8   | 191.4    | 8508.4   | 3639.1   | 122.8    | 4123.1   | 1672.3   |
| Furaneol                                  | 13072.7  | 19674.3  | 15660.9  | 188.0    | 17818.0  | 9951.6   | 8938.7   | 15074.7  | 11751.2  | 6801.4   | 21954.1  | 14258.0  |
| Octanoic Acid                             | 170.8    | 416.8    | 302.3    | 0.0      | 0.0      | 0.0      | 0.0      | 0.0      | 0.0      | 0.0      | 5411.1   | 1680.4   |
| 5-Acetyl-Dihydro-2(3H)-Furanone           | 10982.6  | 18325.1  | 13960.6  | 3975.2   | 13460.5  | 9264.7   | 5494.9   | 14655.9  | 9471.6   | 5688.6   | 18675.1  | 11808.0  |
| 2-Furanpropionic Acid                     | 2201.0   | 11946.6  | 7426.0   | 234.3    | 4166.8   | 1916.4   | 1754.1   | 4878.2   | 2997.4   | 64.7     | 2575.1   | 1323.3   |
| 1,3-Dihydroxy-2-Propanone                 | 277416.1 | 475218.7 | 374715.3 | 367532.2 | 608245.8 | 488678.4 | 389857.3 | 968707.3 | 573672.2 | 416352.8 | 592855.4 | 513700.2 |
| Tetrahydro-5-Methyl-2-Furanmethanol       | 55.0     | 16816.7  | 7363.7   | 21888.5  | 27542.0  | 23664.7  | 13750.2  | 29202.3  | 21004.8  | 17.3     | 30368.1  | 17666.6  |
| 4,5-Dimethyl Vinylene Carbonate           | 5605.3   | 21117.7  | 11900.9  | 766.3    | 21915.2  | 10673.2  | 1323.4   | 18560.2  | 8673.2   | 3382.6   | 14934.6  | 9206.6   |
| 2-Hydroxy-Dihydro-2(3H)-Furanone          | 3724.0   | 36063.3  | 19282.0  | 1726.5   | 36461.2  | 20645.4  | 19202.1  | 34656.0  | 28079.0  | 28392.7  | 37588.3  | 32751.5  |
| 5-Acetoxymethyl-2-Furfural A              | 9370.2   | 18952.0  | 13291.1  | 456.3    | 16969.4  | 6821.7   | 3283.5   | 15535.7  | 8959.7   | 2363.1   | 5772.0   | 3820.9   |
| 5-Acetoxymethyl-2-Furfural B              | 12210.8  | 21938.5  | 16893.8  | 155.3    | 15901.9  | 7119.3   | 4686.6   | 15936.5  | 9690.1   | 3946.5   | 7251.3   | 5786.9   |
| 2-Methoxy-4-Vinyl-Phenol                  | 731.7    | 6924.5   | 2914.0   | 30.2     | 2209.0   | 848.7    | 157.8    | 1438.1   | 767.7    | 975.7    | 1703.7   | 1327.8   |
| 3-Methyl-2,4(3H,5H)-Furandione            | 2926.3   | 11587.8  | 6993.8   | 99.4     | 4594.4   | 2176.1   | 1317.8   | 3020.6   | 2004.9   | 1173.6   | 4050.5   | 2483.4   |
| 3-Hydroxy-2,3-Dihydro-Maltol              | 6671.7   | 15163.6  | 10715.9  | 343.3    | 18409.8  | 9107.7   | 5941.1   | 26463.5  | 14722.5  | 1883.8   | 31652.9  | 19306.6  |
| Decanoic Acid                             | 191.4    | 3628.6   | 1223.7   | 0.0      | 1882.2   | 933.2    | 0.0      | 1559.2   | 669.6    | 0.0      | 18403.4  | 6216.3   |
| 5-Hydroxy-Maltol                          | 9425.1   | 52877.1  | 27044.4  | 258.8    | 16051.4  | 8965.4   | 2035.9   | 29930.3  | 12242.0  | 97.4     | 11826.0  | 7218.5   |
| 2,3-Dihydro-Benzofuran                    | 821.3    | 5941.1   | 2460.7   | 15.2     | 2306.8   | 956.5    | 570.5    | 2039.6   | 1152.0   | 1650.4   | 2693.5   | 2124.9   |
| 1,4:3,6-Dianhydro-.alpha.-d-Glucopyranose | 2560.9   | 8896.0   | 5570.4   | 190.7    | 5604.9   | 2498.0   | 1934.8   | 6758.8   | 3962.9   | 2138.2   | 10448.9  | 5558.3   |
| 4-Pyridinol                               | 3745.0   | 17161.6  | 9516.8   | 154.3    | 780.0    | 380.6    | 138.0    | 959.8    | 508.1    | 202.2    | 697.9    | 460.2    |
| 4-Amino-Phenol                            | 1996.1   | 12202.3  | 6197.1   | 320.9    | 6613.5   | 2735.1   | 112.9    | 8155.0   | 3085.8   | 1038.1   | 1860.4   | 1302.9   |
| Benzoic Acid                              | 14.8     | 15964.1  | 3453.6   | 82.2     | 4784.0   | 1638.9   | 121.6    | 1842.8   | 757.5    | 15.7     | 52908.6  | 16693.5  |
| Dimethylhydrazone 3-Pentanone             | 4837.5   | 22438.0  | 11102.9  | 354.9    | 23158.2  | 9722.6   | 3032.3   | 19449.6  | 9802.9   | 1866.9   | 9603.2   | 5962.1   |
| Undecanoic Acid                           | 72.0     | 11261.9  | 1971.3   | 0.0      | 771.5    | 250.3    | 0.0      | 2547.3   | 845.9    | 0.0      | 0.0      | 0.0      |
| 5-(Hydroxymethyl)-Dihydro-2(3H)-Furanone  | 19514.0  | 84401.1  | 37307.9  | 344.9    | 36947.0  | 20667.1  | 16365.9  | 36332.5  | 26922.0  | 15533.5  | 28762.7  | 22757.9  |

|                                  |          |          |          |          |          |          |          |          |          |         |          |          |
|----------------------------------|----------|----------|----------|----------|----------|----------|----------|----------|----------|---------|----------|----------|
| Dodecanoic Acid                  | 68.7     | 3884.3   | 1750.3   | 0.0      | 1147.1   | 694.0    | 0.0      | 0.0      | 0.0      | 0.0     | 3244.1   | 1517.9   |
| 5-(Hydroxymethyl)-2-Furfural     | 151000.3 | 218661.0 | 177830.0 | 123179.0 | 155732.7 | 140907.9 | 100520.2 | 233092.4 | 172166.2 | 58828.0 | 176461.4 | 122291.6 |
| 3-Methoxy-1,2-Benzenediol        | 1870.1   | 15054.5  | 6072.2   | 106.1    | 587.4    | 288.5    | 54.2     | 809.2    | 397.4    | 75.5    | 457.4    | 247.0    |
| 1-(2-Furanyl)-1,2-Ethanediol     | 10279.8  | 43585.0  | 19107.1  | 20013.6  | 50379.3  | 32342.2  | 423.6    | 86629.7  | 36970.8  | 22088.8 | 45659.7  | 36512.9  |
| 4-Hydroxy-Dihydro-2(3H)-Furanone | 6259.5   | 33221.5  | 18445.0  | 294.7    | 20803.5  | 9263.4   | 4221.8   | 38141.8  | 20755.9  | 4830.4  | 12436.1  | 7738.0   |

**Table S5.** VOCs identified in samples from this study and previously identified in others sugarcane-based syrups from other studies.

| Volatile Organic Compounds | Sugarcane-Based Syrups             |                    |                  |                                    |                    |                    |                    |
|----------------------------|------------------------------------|--------------------|------------------|------------------------------------|--------------------|--------------------|--------------------|
|                            | Portugal<br>(Madeira) <sup>1</sup> | Egypt <sup>2</sup> | USA <sup>3</sup> | Dominican<br>Republic <sup>4</sup> | China <sup>5</sup> | Japan <sup>6</sup> | Japan <sup>7</sup> |
| Pentane                    |                                    |                    |                  |                                    |                    |                    |                    |
| Hexane                     |                                    |                    |                  |                                    |                    |                    |                    |
| 1,4-Pentadiene             |                                    |                    |                  |                                    |                    |                    |                    |
| Methanethiol               |                                    |                    |                  |                                    |                    |                    |                    |
| Ethanal                    | X                                  |                    |                  |                                    |                    |                    | X                  |
| Dimethyl Sulfide           | X                                  | X                  |                  |                                    |                    |                    | X                  |
| Propanal                   | X                                  |                    |                  |                                    |                    |                    | X                  |
| Furan                      | X                                  |                    |                  |                                    |                    |                    |                    |
| 2-Methyl-Propanal          | X                                  | X                  |                  |                                    |                    |                    | X                  |
| Ethyl Formate              |                                    |                    |                  |                                    |                    |                    |                    |
| 2-Propenal                 |                                    |                    |                  |                                    |                    |                    |                    |
| 2-Methyl-Furan             | X                                  |                    |                  |                                    |                    |                    |                    |
| Ethyl Acetate              | X                                  |                    |                  |                                    |                    |                    |                    |
| 2-Butanone                 | X                                  | X                  |                  |                                    |                    |                    |                    |
| 2-Methyl-Butanal           | X                                  | X                  |                  | X                                  |                    |                    | X                  |
| 3-Methyl-Butanal           | X                                  | X                  |                  | X                                  |                    |                    | X                  |
| Ethanol                    | X                                  | X                  |                  |                                    |                    |                    | X                  |
| Benzene                    |                                    |                    |                  |                                    |                    |                    |                    |
| 3-Buten-2-one              |                                    |                    |                  |                                    |                    |                    |                    |
| 2,5-Dimethyl-Furan         | X                                  |                    |                  |                                    |                    |                    |                    |
| Ethyl Propanoate           | X                                  |                    |                  |                                    |                    |                    |                    |
| 2,3-Butanedione            | X                                  |                    |                  | X                                  |                    |                    | X                  |

|                                 |   |   |   |   |   |   |
|---------------------------------|---|---|---|---|---|---|
| 2-Methylpropyl Acetate          |   |   |   |   |   |   |
| 1-Propanol                      | X |   |   |   |   |   |
| 2-Ethyl-5-Methyl-Furan          | X |   |   |   |   |   |
| Toluene                         |   |   |   |   |   |   |
| Ethyl Butanoate                 |   |   |   |   |   |   |
| 2-Methyl-3-Buten-2-ol           | X | X |   |   |   |   |
| Nonomethyl Succinate            |   |   |   |   |   |   |
| 2,3-Pentanedione                | X |   |   |   |   |   |
| Dimethyl Disulfide              | X |   |   |   |   |   |
| 2-Ethenyl-Furan                 |   |   |   |   |   |   |
| 2,5-Diethyltetrahydro-Furan     |   |   |   |   |   |   |
| Hexanal                         | X |   |   |   | X |   |
| 2-Methyl-1-Propanol             | X | X |   | X |   |   |
| 5-Butyl-Dihydro-2(3H)-Furanone  | X |   |   |   |   |   |
| m-Cresol                        |   |   |   | X |   |   |
| 1-Butanol                       | X |   |   |   |   |   |
| 5-Propyl-Dihydro-2(3H)-Furanone |   |   |   |   |   |   |
| 3-Methyl-Pyridazine             |   |   |   |   |   |   |
| 2-Heptanone                     |   |   |   |   |   |   |
| m-Menthane                      |   |   |   |   |   |   |
| 1,3-Diazine                     |   |   |   |   |   |   |
| 2-Methyl-1-Butanol              | X | X |   | X |   |   |
| 2-Propyl-Furan                  |   |   |   |   |   |   |
| Ethyl Hexanoate                 |   |   |   |   |   |   |
| 2-Pentyl-Furan                  |   |   |   |   |   |   |
| 2-Methyl-Pyrazine               |   |   |   |   | X |   |
| 2-Methyl-Dihydro-2(3H)-Furanone | X |   |   |   |   | X |
| p-Cymene                        | X |   |   |   |   |   |
| Mesitylene                      |   |   |   |   |   |   |
| 3,5-Xylenol                     |   |   |   |   |   |   |
| 3-Hydroxy-2-Butanone            |   | X | X |   |   | X |
| Vinylene Carbonate              |   |   |   |   |   |   |
| 2,6-Xylenol                     |   |   |   |   |   |   |
| 1-Hydroxy-2-Propanone           | X | X |   |   |   | X |

|                                                 |   |   |   |   |   |   |   |
|-------------------------------------------------|---|---|---|---|---|---|---|
| 2,5-Dimethyl-Pyrazine                           |   |   | X |   | X |   | X |
| 2,6-Dimethyl-Pyrazine                           | X |   |   |   | X |   | X |
| 2-Cyclopenten-1-one                             |   |   |   |   |   |   |   |
| 1,2,3,4-Tetramethyl-4-(1-methylethenyl)-Benzene |   |   |   |   |   |   |   |
| 2-Methyl-2-Cyclopenten-1-one                    | X |   |   |   |   |   |   |
| 5-Methyl-2-Furanmethanethiol                    | X |   |   |   |   |   |   |
| 1-Hydroxy-2-Butanone                            |   |   |   |   |   |   |   |
| 2-Ethyl-6-Methyl-Pyrazine                       | X |   |   |   | X |   |   |
| 2-Ethyl-5-Methyl-Pyrazine                       |   |   |   |   |   |   |   |
| Nonanal                                         | X |   |   |   | X |   |   |
| Trimethyl-Pyrazine                              |   |   |   |   |   |   |   |
| 3-Ethyl-2-Methyl-1,3-Hexadiene                  |   |   |   |   |   |   |   |
| 2-Cyclohexen-1-one                              |   |   |   |   |   |   |   |
| 5-Methyl-2(3H)-Furanone                         |   |   |   |   |   |   |   |
| 1,3-Dihydro-4-Methyl-2H-Imidazol-2-one          |   |   |   |   |   |   |   |
| Ethyl Octanoate                                 |   |   |   |   |   |   |   |
| 1,2,3,4-Tetrahydro-1,1,6-Trimethyl-Naphthalene  | X |   |   |   |   |   |   |
| Furfural                                        | X | X |   |   |   |   |   |
| Ethanoic Acid                                   | X | X | X | X |   |   | X |
| 1,2,3,4-Tetrahydro-1,6,8-Trimethyl-Naphthalene  |   |   |   |   |   |   |   |
| 2-Ethyl-1-Hexanol                               |   |   |   |   |   |   |   |
| 3-Methyl-Furfural                               |   |   |   |   |   |   |   |
| Furfuryl Formate                                |   |   |   |   |   |   |   |
| Decanal                                         | X |   |   |   | X | X |   |
| 1-(2-Furanyl)-Ethanone                          | X |   |   |   |   | X |   |
| Benzaldehyde                                    | X |   |   |   |   |   |   |
| Furfuryl Acetate                                | X |   |   |   |   |   |   |
| Propanoic Acid                                  |   | X |   |   |   |   |   |
| Dimethyl Sulfoxide                              |   |   |   |   | X |   |   |
| 1,2,3,4-Tetrahydro-1,5,8-Trimethyl-Naphthalene  | X |   |   |   |   |   |   |
| 5-Methyl-Furfural                               | X | X |   |   |   | X |   |
| 4-Cyclopentene-1,3-dione                        |   |   |   |   |   |   |   |
| 2-Methyl-Benzofuran                             | X |   |   |   |   |   |   |
| 1-(5-Methyl-2-Furanyl)-Ethanone                 |   |   |   |   |   | X |   |

|                                           |   |   |   |   |   |   |   |
|-------------------------------------------|---|---|---|---|---|---|---|
| Diethylene Glycol Ethyl Ether             |   |   |   |   |   |   |   |
| 3-Methyl-Dihydro-2(3H)-Furanone           |   |   |   |   |   |   |   |
| 2,3-Dihydro-1,1,4,6-Tetramethyl-1H-Indene |   |   |   |   |   |   |   |
| Benzeneacetaldehyde                       | X |   |   |   |   |   |   |
| 3,5-Dimethyl-Dihydro-2-Furanone           |   |   |   |   |   |   |   |
| 2-Propenoic Acid                          |   |   |   |   |   |   |   |
| Ethyl Decanoate                           |   |   |   |   |   |   |   |
| Acetophenone                              |   |   |   |   |   |   |   |
| 2-Furanmethanol                           | X | X | X |   | X | X | X |
| 3-Furanmethanol                           |   |   |   |   |   |   |   |
| 2,3-Dihydro-1,1,5,6-Tetramethyl-1H-Indene |   |   |   |   |   |   |   |
| 2-(2-Furanylmethyl)-5-Methyl-Furan        |   |   |   |   |   |   |   |
| 3-Methyl-2(5H)-Furanone                   |   |   |   |   |   |   |   |
| 5-Methyl-2-Furanmethanol                  | X |   |   |   | X |   |   |
| Benzyl Acetate                            | X |   |   |   |   |   |   |
| 2(5H)-Furanone                            |   |   |   |   |   |   |   |
| 2,2'-Methylenebis[5-Methyl-Furan          | X |   |   |   |   |   |   |
| 1,2-Cyclopentanedione                     |   |   |   |   |   |   |   |
| 2-Cyclohexenol                            |   |   |   |   |   |   |   |
| 2-Phenylethyl Acetate                     | X |   |   |   |   |   |   |
| 3-Methyl-1,2-Cyclopentanedione            |   |   |   |   |   |   |   |
| 2-Ethyl-Hexanoic Acid                     |   |   |   |   |   |   |   |
| β-Damascenone                             |   |   |   | X |   | X |   |
| Ethyl Undecanoate                         |   |   |   |   |   |   |   |
| 2-Methyl-Propanoic Acid                   |   |   |   |   |   |   |   |
| 2,4,6-Trihydroxypyrimidine                |   |   |   |   |   |   |   |
| Mequinol                                  | X |   |   | X |   | X |   |
| 2,2-Diethyl-3-Methyl-Oxazolidine          |   |   |   |   |   |   |   |
| Oxypurinol                                |   |   |   |   |   |   |   |
| Benzenemethanol                           | X |   |   |   |   | X |   |
| 4-Methyl-2(5H)-Furanone                   |   |   |   |   |   |   |   |
| 3-Ethyl-2-Hydroxy-2-Cyclopenten-1-one     |   |   |   |   |   |   |   |
| Benzeneethanol                            | X |   |   | X |   | X |   |
| Acrylamide                                |   |   | X |   |   |   |   |

|                                           |   |   |   |   |
|-------------------------------------------|---|---|---|---|
| Erythritol                                |   |   |   |   |
| 2,3-Dimethyl-3-Pyrazolin-5-one            |   |   |   |   |
| Furfural Acetone                          |   |   |   |   |
| Cyclotene                                 |   | X |   | X |
| 2-Methyl-1,4-Benzenediol                  |   |   |   |   |
| Heptanoic Acid                            |   |   |   |   |
| Maltol                                    |   |   |   |   |
| 2-Acetylpyrrole                           | X | X | X | X |
| 2,5-Furandicarboxaldehyde                 |   |   |   |   |
| 2H-Pyran-2,6(3H)-Dione                    |   |   |   |   |
| 1-(2-Furanyl)-2-Hydroxy-Ethanone          |   |   |   |   |
| Phenol                                    | X |   |   |   |
| 1H-Pyrrole-2-Carboxaldehyde               |   |   |   |   |
| Phloroglucinol                            |   |   |   |   |
| Furaneol                                  |   | X | X |   |
| Octanoic Acid                             |   |   |   |   |
| 5-Acetyl-Dihydro-2(3H)-Furanone           |   | X |   |   |
| 2-Furanpropionic Acid                     |   |   |   |   |
| 1,3-Dihydroxy-2-Propanone                 |   |   |   |   |
| Tetrahydro-5-Methyl-2-Furanmethanol       |   |   |   |   |
| 4,5-Dimethyl Vinylene Carbonate           |   |   |   |   |
| 2-Hydroxy-Dihydro-2(3H)-Furanone          |   |   |   |   |
| 5-Acetoxymethyl-2-Furfural A              |   |   |   |   |
| 5-Acetoxymethyl-2-Furfural B              |   |   |   |   |
| 2-Methoxy-4-Vinyl-Phenol                  |   | X |   | X |
| 3-Methyl-2,4(3H,5H)-Furandione            |   |   |   |   |
| 3-Hydroxy-2,3-Dihydro-Maltol              |   |   |   |   |
| Decanoic Acid                             |   |   | X |   |
| 5-Hydroxy-Maltol                          |   |   |   |   |
| 2,3-Dihydro-Benzofuran                    |   | X |   |   |
| 1,4:3,6-Dianhydro-.alpha.-d-Glucopyranose |   | X |   |   |
| 4-Pyridinol                               |   |   |   |   |
| 4-Amino-Phenol                            |   |   |   |   |
| Benzoic Acid                              |   | X |   | X |

|                                          |   |   |   |
|------------------------------------------|---|---|---|
| Dimethylhydrazone 3-Pentanone            |   |   |   |
| Undecanoic Acid                          |   |   |   |
| 5-(Hydroxymethyl)-Dihydro-2(3H)-Furanone |   |   |   |
| Dodecanoic Acid                          |   |   |   |
| 5-(Hydroxymethyl)-2-Furfural             | X | X | X |
| 3-Methoxy-1,2-Benzenediol                |   |   |   |
| 1-(2-Furanyl)-1,2-Ethanediol             |   |   |   |
| 4-Hydroxy-Dihydro-2(3H)-Furanone         |   | X |   |

X – Identified in sugarcane based-product.

## References

- (1) Silva, P.; Freitas, J.; Silva, C. L.; Perestrelo, R.; Nunes, F. M.; Câmara, J. S. Establishment of Authenticity and Typicality of Sugarcane Honey Based on Volatile Profile and Multivariate Analysis. *Food Control* 2017, 73, 1176–1188. <https://doi.org/10.1016/j.foodcont.2016.10.035>.
- (2) Edris, A. E.; Murkovic, M.; Siegmund, B. Application of Headspace-Solid-Phase Microextraction and HPLC for the Analysis of the Aroma Volatile Components of Treacle and Determination of Its Content of 5-Hydroxymethylfurfural (HMF). *Food Chem.* 2007, 104 (3), 1310–1314. <https://doi.org/10.1016/j.foodchem.2006.10.033>.
- (3) Quinn, B. P.; Bernier, U. R.; Geden, C. J.; Hogsette, J. A.; Carlson, D. A. Analysis of Extracted and Volatile Components in Blackstrap Molasses Feed as Candidate House Fly Attractants. *J. Chromatogr. A* 2007, 1139 (2), 279–284. <https://doi.org/10.1016/j.chroma.2006.11.039>.
- (4) Franitza, L.; Granvogl, M.; Schieberle, P. Influence of the Production Process on the Key Aroma Compounds of Rum: From Molasses to the Spirit. *J. Agric. Food Chem.* 2016, 64 (47), 9041–9053. <https://doi.org/10.1021/acs.jafc.6b04046>.
- (5) Chen, E.; Song, H.; Li, Y.; Chen, H.; Wang, B.; Che, X.; Zhang, Y.; Zhao, S. Analysis of Aroma Components from Sugarcane to Non-Centrifugal Cane Sugar Using GC-O-MS. *RSC Adv.* 2020, 10 (54), 32276–32289. <https://doi.org/10.1039/d0ra05963c>.
- (6) Abe, E.; Nakatani, Y.; Yamanishi, T.; Muraki, S. Studies on the " Sugary Flavor" of Raw Cane Sugar. I. *Proc. Japan Acad. Ser. B Phys. Biol. Sci.* 1978, 54 (9), 542–547. <https://doi.org/10.2183/pjab.54.542>.
- (7) Asikin, Y.; Wada, K.; Imai, Y.; Kawamoto, Y.; Mizu, M.; Mutsuura, M.; Takahashi, M. Compositions, Taste Characteristics, Volatile Profiles, and Antioxidant Activities of Sweet Sorghum (*Sorghum Bicolor* L.) and Sugarcane (*Saccharum Officinarum* L.) Syrups. *J. Food Meas. Charact.* 2018, 12 (2), 884–891. <https://doi.org/10.1007/s11694-017-9703-2>.

**Table S6A.** Summary of number of volatile organic compounds identified, relative peak areas and total relative peak areas (%) values of main chemical classes identified in sugarcane-based syrups samples from CERT group.

| Main Chemical Class | FRS07           |                  |                       | FRS13           |                  |                       | FRS14           |                  |                       | FRS15           |                  |                       | FRS16           |                  |                       | FRS17           |                  |                       | FRS18           |                  |                       |
|---------------------|-----------------|------------------|-----------------------|-----------------|------------------|-----------------------|-----------------|------------------|-----------------------|-----------------|------------------|-----------------------|-----------------|------------------|-----------------------|-----------------|------------------|-----------------------|-----------------|------------------|-----------------------|
|                     | N <sup>o1</sup> | RPA <sup>2</sup> | TRPA <sup>3</sup> (%) | N <sup>o1</sup> | RPA <sup>2</sup> | TRPA <sup>3</sup> (%) | N <sup>o1</sup> | RPA <sup>2</sup> | TRPA <sup>3</sup> (%) | N <sup>o1</sup> | RPA <sup>2</sup> | TRPA <sup>3</sup> (%) | N <sup>o1</sup> | RPA <sup>2</sup> | TRPA <sup>3</sup> (%) | N <sup>o1</sup> | RPA <sup>2</sup> | TRPA <sup>3</sup> (%) | N <sup>o1</sup> | RPA <sup>2</sup> | TRPA <sup>3</sup> (%) |
| Alcohol             | 9               | 238926           | 8.56                  | 8               | 141489           | 9.48                  | 8               | 117867           | 7.14                  | 8               | 125395           | 9.33                  | 8               | 177046           | 10.39                 | 8               | 193986           | 9.25                  | 5               | 195084           | 8.42                  |
| Aldehyde            | 8               | 110261           | 3.95                  | 8               | 45983            | 3.08                  | 8               | 36391            | 2.20                  | 8               | 31888            | 2.37                  | 8               | 57729            | 3.39                  | 8               | 93030            | 4.44                  | 8               | 121146           | 5.23                  |
| Benzene             | 13              | 64694            | 2.32                  | 13              | 13223            | 0.89                  | 13              | 10510            | 0.64                  | 13              | 19716            | 1.47                  | 13              | 49834            | 2.92                  | 13              | 82987            | 3.96                  | 12              | 39840            | 1.72                  |
| Benzofuran          | 2               | 16623            | 0.60                  | 2               | 5103             | 0.34                  | 2               | 3991             | 0.24                  | 2               | 3832             | 0.29                  | 2               | 9945             | 0.58                  | 2               | 12791            | 0.61                  | 2               | 14420            | 0.62                  |
| Carboxylic Acid     | 8               | 652840           | 23.38                 | 8               | 321528           | 21.55                 | 8               | 358502           | 21.71                 | 8               | 80140            | 5.97                  | 8               | 105433           | 6.19                  | 8               | 211106           | 10.07                 | 8               | 222590           | 9.61                  |
| Ester               | 6               | 59876            | 2.14                  | 6               | 20255            | 1.36                  | 6               | 22649            | 1.37                  | 6               | 22873            | 1.70                  | 6               | 57831            | 3.39                  | 6               | 53139            | 2.54                  | 3               | 37974            | 1.64                  |
| Ether               | 1               | 3325             | 0.12                  | 1               | 1714             | 0.11                  | 1               | 1815             | 0.11                  | 1               | 2018             | 0.15                  | 1               | 1869             | 0.11                  | 1               | 5243             | 0.25                  | 1               | 5155             | 0.22                  |
| Furan               | 45              | 711917           | 25.50                 | 44              | 499327           | 33.47                 | 44              | 551374           | 33.38                 | 44              | 517432           | 38.52                 | 44              | 624600           | 36.66                 | 44              | 604150           | 28.82                 | 44              | 750447           | 32.40                 |
| Hydrocarbon         | 2               | 358              | 0.01                  | 2               | 134              | 0.01                  | 2               | 83               | 0.01                  | 2               | 97               | 0.01                  | 2               | 195              | 0.01                  | 2               | 147              | 0.01                  | 2               | 228              | 0.01                  |
| Indene              | 2               | 323              | 0.01                  | 2               | 136              | 0.01                  | 2               | 286              | 0.02                  | 2               | 319              | 0.02                  | 2               | 353              | 0.02                  | 2               | 600              | 0.03                  | 2               | 612              | 0.03                  |
| Ketone              | 16              | 627082           | 22.46                 | 16              | 354013           | 23.73                 | 16              | 430465           | 26.06                 | 16              | 399621           | 29.75                 | 16              | 432674           | 25.39                 | 16              | 587460           | 28.02                 | 16              | 642068           | 27.72                 |
| Naphthalene         | 3               | 1290             | 0.05                  | 3               | 1038             | 0.07                  | 3               | 1334             | 0.08                  | 3               | 810              | 0.06                  | 3               | 1571             | 0.09                  | 3               | 2531             | 0.12                  | 3               | 1096             | 0.05                  |
| Nitrogen            | 16              | 136025           | 4.87                  | 16              | 47471            | 3.18                  | 16              | 59396            | 3.60                  | 16              | 62281            | 4.64                  | 16              | 86140            | 5.06                  | 16              | 123170           | 5.88                  | 16              | 128124           | 5.53                  |
| Phenol              | 8               | 45120            | 1.62                  | 8               | 8409             | 0.56                  | 8               | 12521            | 0.76                  | 8               | 15127            | 1.13                  | 8               | 29237            | 1.72                  | 8               | 34839            | 1.66                  | 8               | 49265            | 2.13                  |
| Pyran               | 5               | 104079           | 3.73                  | 5               | 30917            | 2.07                  | 5               | 42422            | 2.57                  | 5               | 56803            | 4.23                  | 5               | 65921            | 3.87                  | 5               | 87172            | 4.16                  | 5               | 95391            | 4.12                  |
| Sulfur              | 3               | 9225             | 0.33                  | 4               | 864              | 0.06                  | 4               | 1815             | 0.11                  | 4               | 1585             | 0.12                  | 4               | 2305             | 0.14                  | 4               | 3538             | 0.17                  | 3               | 2155             | 0.09                  |
| Terpene             | 3               | 10290            | 0.37                  | 3               | 393              | 0.03                  | 3               | 268              | 0.02                  | 3               | 3357             | 0.25                  | 3               | 1264             | 0.07                  | 3               | 341              | 0.02                  | 3               | 10826            | 0.47                  |

<sup>1</sup>Number of volatile organic compounds identified.

<sup>2</sup>Relative Peak Areas values.

<sup>3</sup>Total Relative Peak Areas percentage values.

**Table S6B.** Summary of number of volatile organic compounds identified, relative peak areas and total relative peak areas (%) values of main chemical classes identified in sugarcane-based syrups samples from NCERT group.

| Main Chemical Class | ECAL14          |                  |                       | ENCAL14         |                  |                       | GLA14           |                  |                       |
|---------------------|-----------------|------------------|-----------------------|-----------------|------------------|-----------------------|-----------------|------------------|-----------------------|
|                     | N <sup>o1</sup> | RPA <sup>2</sup> | TRPA <sup>3</sup> (%) | N <sup>o1</sup> | RPA <sup>2</sup> | TRPA <sup>3</sup> (%) | N <sup>o1</sup> | RPA <sup>2</sup> | TRPA <sup>3</sup> (%) |
| Alcohol             | 9               | 74710            | 4.68                  | 7               | 48908            | 4.68                  | 8               | 104618           | 4.82                  |
| Aldehyde            | 8               | 72891            | 4.56                  | 9               | 17437            | 1.67                  | 8               | 45767            | 2.11                  |
| Benzene             | 12              | 6628             | 0.41                  | 11              | 2663             | 0.25                  | 12              | 40772            | 1.88                  |
| Benzofuran          | 2               | 4074             | 0.25                  | 2               | 38               | 0.00                  | 2               | 4621             | 0.21                  |
| Carboxylic Acid     | 6               | 359032           | 22.47                 | 4               | 237798           | 22.74                 | 6               | 461712           | 21.26                 |
| Ester               | 6               | 28397            | 1.78                  | 4               | 965              | 0.09                  | 11              | 77463            | 3.57                  |
| Ether               | 1               | 1028             | 0.06                  | 1               | 24               | 0.00                  | 1               | 2046             | 0.09                  |
| Furan               | 43              | 436967           | 27.34                 | 43              | 330082           | 31.56                 | 43              | 583090           | 26.85                 |
| Hydrocarbon         | 2               | 155              | 0.01                  | 3               | 114              | 0.01                  | 2               | 358              | 0.02                  |
| Indene              | 0               | 0                | 0.00                  | 1               | 7                | 0.00                  | 1               | 298              | 0.01                  |
| Ketone              | 17              | 537614           | 33.64                 | 16              | 394890           | 37.76                 | 16              | 702576           | 32.35                 |
| Naphthalene         | 3               | 428              | 0.03                  | 3               | 14               | 0.00                  | 3               | 727              | 0.03                  |
| Nitrogen            | 16              | 29900            | 1.87                  | 16              | 1823             | 0.17                  | 16              | 56333            | 2.59                  |
| Phenol              | 7               | 8104             | 0.51                  | 7               | 921              | 0.09                  | 8               | 24915            | 1.15                  |
| Pyran               | 5               | 30634            | 1.92                  | 5               | 1758             | 0.17                  | 5               | 65172            | 3.00                  |
| Sulfur              | 4               | 5666             | 0.35                  | 3               | 7870             | 0.75                  | 3               | 1033             | 0.05                  |
| Terpene             | 2               | 1843             | 0.12                  | 1               | 420              | 0.04                  | 2               | 548              | 0.03                  |

<sup>1</sup>Number of volatile organic compounds identified.

<sup>2</sup>Relative Peak Areas values.

<sup>3</sup>Total Relative Peak Areas percentage values.

**Table S6C.** Summary of number of volatile organic compounds identified, relative peak areas and total relative peak areas (%) values of main chemical classes identified in sugarcane-based syrups samples from MED group.

| Main Chemical Class | ESP16           |                  |                       | EGP17           |                  |                       | EGPA16          |                  |                       | EGPB16          |                  |                       | EGPC16          |                  |                       |
|---------------------|-----------------|------------------|-----------------------|-----------------|------------------|-----------------------|-----------------|------------------|-----------------------|-----------------|------------------|-----------------------|-----------------|------------------|-----------------------|
|                     | N <sup>o1</sup> | RPA <sup>2</sup> | TRPA <sup>3</sup> (%) | N <sup>o1</sup> | RPA <sup>2</sup> | TRPA <sup>3</sup> (%) | N <sup>o1</sup> | RPA <sup>2</sup> | TRPA <sup>3</sup> (%) | N <sup>o1</sup> | RPA <sup>2</sup> | TRPA <sup>3</sup> (%) | N <sup>o1</sup> | RPA <sup>2</sup> | TRPA <sup>3</sup> (%) |
| Alcohol             | 7               | 51207            | 4.22                  | 5               | 114539           | 5.23                  | 5               | 65927            | 2.53                  | 7               | 46370            | 3.09                  | 7               | 14261            | 1.27                  |
| Aldehyde            | 8               | 17653            | 1.46                  | 9               | 40377            | 1.84                  | 9               | 63256            | 2.43                  | 9               | 33742            | 2.25                  | 9               | 22389            | 2.00                  |
| Benzene             | 12              | 2261             | 0.19                  | 10              | 19924            | 0.91                  | 10              | 14686            | 0.56                  | 11              | 5452             | 0.36                  | 10              | 1618             | 0.14                  |
| Benzofuran          | 2               | 1392             | 0.11                  | 2               | 2018             | 0.09                  | 2               | 1977             | 0.08                  | 2               | 1465             | 0.10                  | 2               | 614              | 0.05                  |
| Carboxylic Acid     | 5               | 206945           | 17.06                 | 7               | 538636           | 24.58                 | 7               | 684737           | 26.26                 | 6               | 274028           | 18.28                 | 7               | 205452           | 18.37                 |
| Ester               | 3               | 10623            | 0.88                  | 5               | 37504            | 1.71                  | 5               | 23277            | 0.89                  | 5               | 5496             | 0.37                  | 4               | 5128             | 0.46                  |
| Ether               | 1               | 650              | 0.05                  | 1               | 2313             | 0.11                  | 1               | 3373             | 0.13                  | 1               | 3420             | 0.23                  | 1               | 1169             | 0.10                  |
| Furan               | 43              | 361628           | 29.81                 | 43              | 623287           | 28.44                 | 42              | 655896           | 25.15                 | 44              | 477822           | 31.87                 | 43              | 366930           | 32.80                 |
| Hydrocarbon         | 2               | 379              | 0.03                  | 2               | 668              | 0.03                  | 2               | 797              | 0.03                  | 2               | 320              | 0.02                  | 2               | 515              | 0.05                  |
| Indene              | 2               | 655              | 0.05                  | 1               | 1137             | 0.05                  | 1               | 273              | 0.01                  | 2               | 877              | 0.06                  | 2               | 69               | 0.01                  |
| Ketone              | 16              | 514880           | 42.44                 | 16              | 670634           | 30.60                 | 16              | 958064           | 36.74                 | 16              | 561424           | 37.45                 | 16              | 444025           | 39.69                 |
| Naphthalene         | 3               | 2465             | 0.20                  | 2               | 2482             | 0.11                  | 2               | 921              | 0.04                  | 3               | 2731             | 0.18                  | 2               | 50               | 0.00                  |
| Nitrogen            | 16              | 10739            | 0.89                  | 15              | 48065            | 2.19                  | 15              | 42134            | 1.62                  | 15              | 12995            | 0.87                  | 15              | 9588             | 0.86                  |
| Phenol              | 8               | 5446             | 0.45                  | 7               | 23060            | 1.05                  | 7               | 17230            | 0.66                  | 7               | 6915             | 0.46                  | 7               | 2753             | 0.25                  |
| Pyran               | 5               | 25529            | 2.10                  | 5               | 48277            | 2.20                  | 5               | 55116            | 2.11                  | 5               | 51234            | 3.42                  | 5               | 33073            | 2.96                  |
| Sulfur              | 4               | 227              | 0.02                  | 4               | 17167            | 0.78                  | 4               | 19469            | 0.75                  | 4               | 14369            | 0.96                  | 4               | 11049            | 0.99                  |
| Terpene             | 2               | 484              | 0.04                  | 2               | 1414             | 0.06                  | 2               | 572              | 0.02                  | 3               | 464              | 0.03                  | 2               | 25               | 0.00                  |

<sup>1</sup>Number of volatile organic compounds identified.

<sup>2</sup>Relative Peak Areas values.

<sup>3</sup>Total Relative Peak Areas percentage values.

**Table S6D.** Summary of number of volatile organic compounds identified, relative peak areas and total relative peak areas (%) values of main chemical classes identified in sugarcane-based syrups samples from STH group.

| Main Chemical Class | MCBR14          |                  |                       | MDBR14          |                  |                       | AUS17           |                  |                       |
|---------------------|-----------------|------------------|-----------------------|-----------------|------------------|-----------------------|-----------------|------------------|-----------------------|
|                     | N <sup>o1</sup> | RPA <sup>2</sup> | TRPA <sup>3</sup> (%) | N <sup>o1</sup> | RPA <sup>2</sup> | TRPA <sup>3</sup> (%) | N <sup>o1</sup> | RPA <sup>2</sup> | TRPA <sup>3</sup> (%) |
| Alcohol             | 7               | 43836            | 2.60                  | 7               | 58615            | 2.74                  | 6               | 69939            | 5.67                  |
| Aldehyde            | 8               | 24916            | 1.48                  | 9               | 39631            | 1.85                  | 8               | 29015            | 2.35                  |
| Benzene             | 11              | 2941             | 0.17                  | 11              | 68107            | 3.19                  | 11              | 819              | 0.07                  |
| Benzofuran          | 2               | 2515             | 0.15                  | 2               | 2333             | 0.11                  | 2               | 2415             | 0.20                  |
| Carboxylic Acid     | 6               | 348716           | 20.68                 | 9               | 531506           | 24.86                 | 4               | 259430           | 21.04                 |
| Ester               | 6               | 17328            | 1.03                  | 3               | 26475            | 1.24                  | 3               | 6046             | 0.49                  |
| Ether               | 1               | 3573             | 0.21                  | 1               | 264              | 0.01                  | 1               | 411              | 0.03                  |
| Furan               | 45              | 526628           | 31.23                 | 44              | 473805           | 22.16                 | 43              | 355368           | 28.82                 |
| Hydrocarbon         | 3               | 374              | 0.02                  | 3               | 937              | 0.04                  | 3               | 635              | 0.05                  |
| Indene              | 2               | 2834             | 0.17                  | 2               | 6516             | 0.30                  | 2               | 172              | 0.01                  |
| Ketone              | 16              | 629608           | 37.34                 | 16              | 778171           | 36.40                 | 16              | 461884           | 37.46                 |
| Naphthalene         | 3               | 2848             | 0.17                  | 3               | 13931            | 0.65                  | 2               | 273              | 0.02                  |
| Nitrogen            | 15              | 19440            | 1.15                  | 15              | 29924            | 1.40                  | 18              | 15939            | 1.29                  |
| Phenol              | 8               | 8292             | 0.49                  | 7               | 15839            | 0.74                  | 7               | 6908             | 0.56                  |
| Pyran               | 5               | 50882            | 3.02                  | 5               | 58064            | 2.72                  | 5               | 8199             | 0.66                  |
| Sulfur              | 3               | 496              | 0.03                  | 3               | 31002            | 1.45                  | 4               | 14220            | 1.15                  |
| Terpene             | 2               | 969              | 0.06                  | 4               | 2893             | 0.14                  | 2               | 1374             | 0.11                  |

<sup>1</sup>Number of volatile organic compounds identified.

<sup>2</sup>Relative Peak Areas values.

<sup>3</sup>Total Relative Peak Areas percentage values.

**Table S7.** One-way ANOVA test results based on the relative peak areas of the identified VOCs in sugarcane-based syrups samples.

| Volatile Organic Compounds | One-way ANOVA Test |                |                                             |           |         |         |
|----------------------------|--------------------|----------------|---------------------------------------------|-----------|---------|---------|
|                            | All Samples        |                | Tukey Test <sup>3</sup> ( $\alpha < 0.05$ ) |           |         |         |
|                            | F <sup>1</sup>     | P <sup>2</sup> | CERT (A)                                    | NCERT (B) | MED (C) | STH (D) |
| Pentane                    | 48.69              | 7.22E-15       | C; D                                        | C; D      | A; B; D | A; B; C |
| Hexane                     | 6.19               | 1.17E-03       | C                                           | C         | A; B    |         |
| 1,4-Pentadiene             | 49.98              | 4.44E-15       | D                                           | D         | D       | A; B; C |
| Methanethiol               | 0.55               | 6.48E-01       |                                             |           |         |         |
| Ethanal                    | 3.90               | 1.39E-02       | C                                           |           | A       |         |
| Dimethyl Sulfide           | 10.62              | 1.63E-05       | C; D                                        | C; D      | A; B    | A; B    |
| Propanal                   | 1.66               | 1.87E-01       |                                             |           |         |         |
| Furan                      | 4.36               | 8.35E-03       | D                                           |           | D       | A; C    |
| 2-Methyl-Propanal          | 6.29               | 1.05E-03       | C; D                                        |           | A       | A       |
| Ethyl Formate              | 6.50               | 8.41E-04       | C; D                                        |           | A       | A       |
| 2-Propenal                 | 4.14               | 1.07E-02       | D                                           | D         | D       | A; B; C |
| 2-Methyl-Furan             | 7.02               | 4.96E-04       | D                                           | D         | D       | A; B; C |
| Ethyl Acetate              | 6.88               | 5.71E-04       | C; D                                        | C; D      | A; B    | A; B    |
| 2-Butanone                 | 2.67               | 5.76E-02       |                                             |           |         |         |
| 2-Methyl-Butanal           | 17.62              | 6.14E-08       | B; C; D                                     | A         | A       | A       |
| 3-Methyl-Butanal           | 4.84               | 4.90E-03       | D                                           |           |         | A       |
| Ethanol                    | 38.57              | 4.72E-13       | B; C; D                                     | A         | A       | A       |
| Benzene                    | 2.93               | 4.25E-02       |                                             |           |         |         |
| 3-Buten-2-one              | 1.00               | 4.00E-01       |                                             |           |         |         |
| 2,5-Dimethyl-Furan         | 6.32               | 1.02E-03       | D                                           | D         | D       | A; B; C |
| Ethyl Ester Propanoic Acid | 6.06               | 1.34E-03       | B                                           | A; C; D   | B       | B       |
| 2,3-Butanedione            | 1.97               | 1.30E-01       |                                             |           |         |         |
| 2-Methylpropyl Acetate     | 7.54               | 2.96E-04       | B                                           | A; C; D   | B       | B       |
| 1-Propanol                 | 10.48              | 1.85E-05       | B                                           | A; C; D   | B       | B       |
| 2-Ethyl-5-Methyl-Furan     | 2.34               | 8.43E-02       |                                             |           |         |         |
| Toluene                    | 3.73               | 1.69E-02       | C                                           |           | A       |         |
| Ethyl Butanoate            | 6.54               | 8.12E-04       | B                                           | A; C; D   | B       | B       |
| 2-Methyl-3-Buten-2-ol      | 1.98               | 1.29E-01       |                                             |           |         |         |

|                                                 |       |          |         |         |      |         |
|-------------------------------------------------|-------|----------|---------|---------|------|---------|
| Nonomethyl Succinate                            | 1.48  | 2.32E-01 |         |         |      |         |
| 2,3-Pentanedione                                | 0.67  | 5.73E-01 |         |         |      |         |
| Dimethyl Disulfide                              | 3.01  | 3.86E-02 |         |         |      |         |
| 2-Ethenyl-Furan                                 | 1.81  | 1.57E-01 |         |         |      |         |
| 2,5-Diethyltetrahydro-Furan                     | 1.17  | 3.32E-01 |         |         |      |         |
| Hexanal                                         | 6.57  | 7.86E-04 | D       | D       | D    | A; B; C |
| 2-Methyl-1-Propanol                             | 4.77  | 5.31E-03 | B       | A; C; D | B    | B       |
| 5-Butyl-Dihydro-2(3H)-Furanone                  | 7.17  | 4.29E-04 | D       | D       | D    | A; B; C |
| m-Cresol                                        | 7.92  | 2.04E-04 | B; C; D | A       | A    | A       |
| 1-Butanol                                       | 4.26  | 9.35E-03 |         | C       | B    |         |
| 5-Propyl-Dihydro-2(3H)-Furanone                 | 6.25  | 1.10E-03 | D       | D       | D    | A; B; C |
| 3-Methyl-Pyridazine                             | 17.95 | 4.85E-08 | B; C; D | A       | A    | A       |
| 2-Heptanone                                     | 6.94  | 5.37E-04 | B       | A; C; D | B    | B       |
| m-Menthane                                      | 4.49  | 7.22E-03 |         | C       | B; D | C       |
| 1,3-Diazine                                     | 4.21  | 9.93E-03 | C       |         | A    |         |
| 2-Methyl-1-Butanol                              | 7.80  | 2.29E-04 | C; D    | C; D    | A; B | A; B    |
| 2-Propyl-Furan                                  | 8.62  | 1.03E-04 | B; C; D | A       | A    | A       |
| Ethyl Hexanoate                                 | 6.79  | 6.29E-04 | B       | A; C; D | B    | B       |
| 2-Pentyl-Furan                                  | 6.50  | 8.47E-04 | D       | D       | D    | A; B; C |
| 2-Methyl-Pyrazine                               | 0.91  | 4.45E-01 |         |         |      |         |
| 2-Methyl-Dihydro-2(3H)-Furanone                 | 23.37 | 1.35E-09 | B; C; D | A       | A    | A       |
| p-Cymene                                        | 11.15 | 1.02E-05 | C; D    | C; D    | A; B | A; B    |
| Mesitylene                                      | 1.67  | 1.85E-01 |         |         |      |         |
| 3,5-Xylenol                                     | 15.25 | 3.56E-07 | B; C; D | A       | A    | A       |
| 3-Hydroxy-2-Butanone                            | 7.23  | 4.00E-04 | B; C    | A       | A    |         |
| Vinylene Carbonate                              | 11.87 | 5.49E-06 | B; C; D | A       | A    | A       |
| 2,6-Xylenol                                     | 7.97  | 1.93E-04 | B; C    | A       | A    |         |
| 1-Hydroxy-2-Propanone                           | 4.87  | 4.76E-03 |         |         | D    | C       |
| 2,5-Dimethyl-Pyrazine                           | 3.76  | 1.64E-02 |         |         |      |         |
| 2,6-Dimethyl-Pyrazine                           | 9.80  | 3.41E-05 | B; C; D | A       | A    | A       |
| 2-Cyclopenten-1-one                             | 6.76  | 6.49E-04 | C       | D       | A, D | B; C    |
| 1,2,3,4-Tetramethyl-4-(1-methylethenyl)-Benzene | 6.78  | 6.33E-04 | D       | D       | D    | A; B; C |
| 2-Methyl-2-Cyclopenten-1-one                    | 12.45 | 3.36E-06 | B; C; D | A       | A    | A       |
| 5-Methyl-2-Furanmethanethiol                    | 5.25  | 3.17E-03 |         | C; D    | B    | B       |

|                                                |       |          |         |         |      |         |
|------------------------------------------------|-------|----------|---------|---------|------|---------|
| 1-Hydroxy-2-Butanone                           | 4.92  | 4.51E-03 | C       |         | A; D | C       |
| 2-Ethyl-6-Methyl-Pyrazine                      | 5.56  | 2.25E-03 | A       | D       | A; D | B; C    |
| 2-Ethyl-5-Methyl-Pyrazine                      | 6.93  | 5.44E-04 | D       | D       | D    | A; B; C |
| Nonanal                                        | 3.02  | 3.83E-02 | D       |         |      | A       |
| Trimethyl-Pyrazine                             | 6.94  | 5.41E-04 | D       | D       | D    | A; B; C |
| 3-Ethyl-2-Methyl-1,3-Hexadiene                 | 6.87  | 5.77E-04 | D       | D       | D    | A; B; C |
| 2-Cyclohexen-1-one                             | 6.19  | 1.16E-03 | D       | D       | D    | A; B; C |
| 5-Methyl-2(3H)-Furanone                        | 29.65 | 3.71E-11 | B; C; D | A       | A    | A       |
| 1,3-Dihydro-4-Methyl-2H-Imidazol-2-one         | 8.43  | 1.24E-04 | B; C    | A       | A    |         |
| Ethyl Octanoate                                | 6.93  | 5.44E-04 | B       | A; C; D | B    | B       |
| 1,2,3,4-Tetrahydro-1,1,6-Trimethyl-Naphthalene | 6.21  | 1.14E-03 | D       | D       |      | A; B    |
| Furfural                                       | 2.57  | 6.44E-02 |         |         |      |         |
| Ethanoic Acid                                  | 1.59  | 2.03E-01 |         |         |      |         |
| 1,2,3,4-Tetrahydro-1,6,8-Trimethyl-Naphthalene | 12.54 | 3.13E-06 | D       | D       | D    | A; B; C |
| 2-Ethyl-1-Hexanol                              | 4.98  | 4.23E-03 | B       | A; C; D | B    | B       |
| 3-Methyl-Furfural                              | 16.94 | 1.01E-07 | B       | A; C; D | B    | B       |
| Furfuryl Formate                               | 17.23 | 8.15E-08 | B; C; D | A       | A    | A       |
| Decanal                                        | 14.47 | 6.54E-07 | B; C; D | A       | A    | A       |
| 1-(2-Furanyl)-Ethanone                         | 3.94  | 1.33E-02 | D       |         |      | A       |
| Benzaldehyde                                   | 4.98  | 4.21E-03 | D       | D       | D    | A; B; C |
| Furfuryl Acetate                               | 20.88 | 6.61E-09 | B; C; D | A       | A    | A       |
| Propanoic Acid                                 | 3.32  | 2.70E-02 | D       |         |      | A       |
| Dimethyl Sulfoxide                             | 3.01  | 3.87E-02 |         | C       | B    |         |
| 1,2,3,4-Tetrahydro-1,5,8-Trimethyl-Naphthalene | 3.47  | 2.28E-02 |         |         | D    | C       |
| 5-Methyl-Furfural                              | 12.90 | 2.31E-06 | B; D    | A; C    | B; D | A; C    |
| 4-Cyclopentene-1,3-dione                       | 42.70 | 7.89E-14 | B; C; D | A       | A    | A       |
| 2-Methyl-Benzofuran                            | 27.39 | 1.27E-10 | B; C; D | A       | A    | A       |
| 1-(5-Methyl-2-Furanyl)-Ethanone                | 11.80 | 5.84E-06 | B; C; D | A       | A    | A       |
| Diethylene Glycol Ethyl Ether                  | 5.67  | 2.00E-03 | B; D    | A       |      | A       |
| 3-Methyl-Dihydro-2(3H)-Furanone                | 4.62  | 6.25E-03 |         | D       | D    | B; C    |
| 2,3-Dihydro-1,1,4,6-Tetramethyl-1H-Indene      | 17.05 | 9.30E-08 | D       | D       | D    | A; B; C |
| Benzeneacetaldehyde                            | 11.51 | 7.47E-06 | B; C; D | A       | A    | A       |
| 3,5-Dimethyl-Dihydro-2-Furanone                | 5.54  | 2.31E-03 | B       | A; C    | B    |         |
| 2-Propenoic Acid                               | 2.09  | 1.14E-01 |         |         |      |         |

|                                           |        |           |         |         |         |         |
|-------------------------------------------|--------|-----------|---------|---------|---------|---------|
| Ethyl Decanoate                           | 6.94   | 5.40E-04  | B       | A; C; D | B       | B       |
| Acetophenone                              | 13.09  | 1.98E-06  | B; C    | A       | A       |         |
| 2-Furanmethanol                           | 0.50   | 6.84E-01  |         |         |         |         |
| 3-Furanmethanol                           | 5.07   | 3.82E-03  | C       | C       | A; B    |         |
| 2,3-Dihydro-1,1,5,6-Tetramethyl-1H-Indene | 14.77  | 5.16E-07  | D       | D       | D       | A; B; C |
| 2-(2-Furanylmethyl)-5-Methyl-Furan        | 28.08  | 8.70E-11  | B; C; D | A       | A       | A       |
| 3-Methyl-2(5H)-Furanone                   | 2.66   | 5.80E-02  |         |         |         |         |
| 5-Methyl-2-Furanmethanol                  | 13.31  | 1.65E-06  | B; C    | A       | A; D    | C       |
| Benzyl Acetate                            | 6.18   | 1.18E-03  | B       | A; C; D | B       | B       |
| 2(5H)-Furanone                            | 10.38  | 2.02E-05  | B; C; D | A       | A       | A       |
| 2,2'-Methylenebis[5-Methyl-Furan          | 24.37  | 7.39E-10  | B; C; D | A       | A       | A       |
| 1,2-Cyclopentanedione                     | 9.93   | 3.05E-05  | B; C    | A; D    | A       | B       |
| 2-Cyclohexenol                            | 23.74  | 1.08E-09  | B; C; D | A       | A       | A       |
| 2-Phenylethyl Acetate                     | 1.70   | 1.78E-01  |         |         |         |         |
| 3-Methyl-1,2-Cyclopentanedione            | 8.89   | 7.98E-05  | B; C    | A       | A       |         |
| 2-Ethyl-Hexanoic Acid                     | 16.91  | 1.03E-07  | C       | C       | A; B; D | C       |
| β-Damascenone                             | 4.62   | 6.25E-03  | C       |         | A       |         |
| Ethyl Undecanoate                         | 6.25   | 1.09E-03  | B       | A; C    | B       |         |
| 2-Methyl-Propanoic Acid                   | 3.65   | 1.86E-02  |         |         | D       | C       |
| 2,4,6-Trihydroxypyrimidine                | 180.09 | ≤1.00E-19 | B; C; D | A       | A       | A       |
| Mequinol                                  | 7.19   | 4.20E-04  | B; C; D | A       | A       | A       |
| 2,2-Diethyl-3-Methyl-Oxazolidine          | 7.29   | 3.79E-04  | B; C; D | A       | A       | A       |
| Oxypurinol                                | 23.80  | 1.04E-09  | B; C; D | A       | A       | A       |
| Benzenemethanol                           | 3.17   | 3.23E-02  |         |         |         |         |
| 4-Methyl-2(5H)-Furanone                   | 13.71  | 1.19E-06  | B; C    | A       | A       |         |
| 3-Ethyl-2-Hydroxy-2-Cyclopenten-1-one     | 8.08   | 1.74E-04  | B; C    | A; D    | A; D    | B; C    |
| Benzeneethanol                            | 4.25   | 9.45E-03  | B       | A; D    |         | C       |
| Acrylamide                                | 13.60  | 1.30E-06  | B; C; D | A       | A       | A       |
| Erythritol                                | 3.43   | 2.40E-02  |         |         | D       | C       |
| 2,3-Dimethyl-3-Pyrazolin-5-one            | 13.49  | 1.43E-06  | B; C; D | A       | A       | A       |
| Furfural Acetone                          | 22.71  | 2.03E-09  | B; C; D | A       | A       | A       |
| Cyclotene                                 | 17.59  | 6.30E-08  | B; C; D | A       | A       | A       |
| 2-Methyl-1,4-Benzenediol                  | 7.42   | 3.32E-04  | B; C; D | A       | A       | A       |
| Heptanoic Acid                            | 6.74   | 6.57E-04  | D       | D       | D       | A; B; C |

|                                           |       |          |         |      |      |         |
|-------------------------------------------|-------|----------|---------|------|------|---------|
| Maltol                                    | 15.39 | 3.21E-07 | B; C; D | A    | A    | A       |
| 2-Acetylpyrrole                           | 17.38 | 7.30E-08 | B; C; D | A    | A    | A       |
| 2,5-Furandicarboxaldehyde                 | 30.06 | 2.98E-11 | B; C; D | A    | A    | A       |
| 2H-Pyran-2,6(3H)-Dione                    | 9.16  | 6.17E-05 | B; C; D | A    | A    | A       |
| 1-(2-Furanyl)-2-Hydroxy-Ethanone          | 9.33  | 5.29E-05 | B; C; D | A    | A    | A       |
| Phenol                                    | 6.26  | 1.08E-03 | B; C    | A; D | A    | B       |
| 1H-Pyrrole-2-Carboxaldehyde               | 4.50  | 7.14E-03 | B; C    | A    | A    |         |
| Phloroglucinol                            | 10.07 | 2.69E-05 | B; C; D | A    | A    | A       |
| Furaneol                                  | 5.05  | 3.91E-03 | B; C    | A    | A    |         |
| Octanoic Acid                             | 6.11  | 1.26E-03 | D       | D    | D    | A; B; C |
| 5-Acetyl-Dihydro-2(3H)-Furanone           | 6.80  | 6.22E-04 | B; C    | A    | A    |         |
| 2-Furanpropionic Acid                     | 19.07 | 2.23E-08 | B; C; D | A    | A    | A       |
| 1,3-Dihydroxy-2-Propanone                 | 10.30 | 2.18E-05 | C; D    |      | A    | A       |
| Tetrahydro-5-Methyl-2-Furanmethanol       | 15.38 | 3.23E-07 | B; C; D | A    | A    | A       |
| 4,5-Dimethyl Vinylene Carbonate           | 0.89  | 4.55E-01 |         |      |      |         |
| 2-Hydroxy-Dihydro-2(3H)-Furanone          | 4.53  | 6.94E-03 | D       |      |      | A       |
| 5-Acetoxyethyl-2-Furfural A               | 11.55 | 7.21E-06 | B; C; D | A    | A; D | A; C    |
| 5-Acetoxyethyl-2-Furfural B               | 22.74 | 2.00E-09 | B; C; D | A    | A    | A       |
| 2-Methoxy-4-Vinyl-Phenol                  | 10.71 | 1.51E-05 | B; C; D | A    | A    | A       |
| 3-Methyl-2,4(3H,5H)-Furandione            | 22.67 | 2.09E-09 | B; C; D | A    | A    | A       |
| 3-Hydroxy-2,3-Dihydro-Maltol              | 4.00  | 1.25E-02 | D       | D    |      | A; B    |
| Decanoic Acid                             | 6.02  | 1.39E-03 | D       | D    | D    | A; B; C |
| 5-Hydroxy-Maltol                          | 13.13 | 1.92E-06 | B; C; D | A    | A    | A       |
| 2,3-Dihydro-Benzofuran                    | 6.15  | 1.22E-03 | B; C    | A    | A    |         |
| 1,4:3,6-Dianhydro-.alpha.-d-Glucopyranose | 4.60  | 6.39E-03 | B       | A; D |      | B       |
| 4-Pyridinol                               | 45.77 | 2.25E-14 | B; C; D | A    | A    | A       |
| 4-Amino-Phenol                            | 7.14  | 4.38E-04 | B; C; D | A    | A    | A       |
| Benzoic Acid                              | 4.98  | 4.22E-03 | D       | D    | D    | A; B; C |
| Dimethylhydrazine 3-Pentanone             | 1.27  | 2.96E-01 |         |      |      |         |
| Undecanoic Acid                           | 2.03  | 1.21E-01 |         |      |      |         |
| 5-(Hydroxymethyl)-Dihydro-2(3H)-Furanone  | 4.65  | 6.04E-03 | B; D    | A    |      | A       |
| Dodecanoic Acid                           | 8.96  | 7.45E-05 | C       |      | A; D | C       |
| 5-(Hydroxymethyl)-2-Furfural              | 8.22  | 1.51E-04 | B; D    | A    | D    | A; C    |
| 3-Methoxy-1,2-Benzenediol                 | 22.36 | 2.55E-09 | B; C; D | A    | A    | A       |

|                                  |      |          |   |   |      |      |
|----------------------------------|------|----------|---|---|------|------|
| 1-(2-Furanyl)-1,2-Ethanediol     | 3.47 | 2.28E-02 | C |   | A    |      |
| 4-Hydroxy-Dihydro-2(3H)-Furanone | 6.27 | 1.07E-03 | D | C | B; D | A; C |

<sup>1</sup>F Value - Fischer value from One-way ANOVA test.

<sup>2</sup>P Value - Probability value from One-way ANOVA test.

<sup>3</sup>Samples with significantly different relative peak area values determined by one-way ANOVA with Post-hoc Tukey test ( $\alpha < 0.05$ ).

**Table S8.** Information summary of Principal Component Analysis (PCA) and Partial Least Square Analysis (PLS) based on the relative peak areas of the identified VOCs in sugarcane-based syrups samples.

| Analysis | Component | R <sup>2</sup> X | Eigenvalues | R <sup>2</sup> Y | Q <sup>2</sup> | Significance | Iterations |
|----------|-----------|------------------|-------------|------------------|----------------|--------------|------------|
| PCA      | 1         | 0.3542           | 57.37       | n.a.             | 0.322          | S            | 6          |
|          | 2         | 0.1846           | 29.90       | n.a.             | 0.020          | S            | 13         |
|          | 3         | 0.1105           | 17.90       | n.a.             | 0.109          | S            | 11         |
|          | 4         | 0.0533           | 8.64        | n.a.             | 0.019          | S            | 8          |
|          | 5         | 0.0485           | 7.86        | n.a.             | 0.055          | S            | 12         |
|          | 6         | 0.0374           | 6.06        | n.a.             | -0.002         | UNKNOWN      | 50         |
| PLS      | 1         | 0.3856           | 57.07       | 0.058            | 0.014          | S            | 10         |
|          | 2         | 0.1982           | 29.34       | 0.059            | 0.001          | S            | 9          |
|          | 3         | 0.1158           | 17.14       | 0.059            | 0.019          | S            | 11         |
|          | 4         | 0.0562           | 8.31        | 0.059            | 0.006          | S            | 8          |
|          | 5         | 0.0479           | 7.09        | 0.059            | 0.012          | S            | 12         |
|          | 6         | 0.0361           | 5.35        | 0.059            | 0.011          | S            | 25         |
|          | 7         | 0.0307           | 4.55        | 0.058            | 0.020          | S            | 33         |
|          | 8         | 0.0290           | 4.29        | 0.059            | 0.023          | S            | 13         |
|          | 9         | 0.0211           | 3.12        | 0.059            | 0.019          | S            | 24         |
|          | 10        | 0.0206           | 3.05        | 0.059            | 0.041          | S            | 15         |
|          | 11        | 0.0147           | 2.17        | 0.058            | 0.026          | S            | 50         |
|          | 12        | 0.0138           | 2.04        | 0.059            | 0.086          | S            | 13         |
|          | 13        | 0.0091           | 1.35        | 0.058            | 0.084          | S            | 16         |
|          | 14        | 0.0072           | 1.07        | 0.058            | 0.117          | S            | 10         |
|          | 15        | 0.0043           | 0.64        | 0.058            | 0.068          | S            | 21         |

|    |        |      |       |       |   |    |
|----|--------|------|-------|-------|---|----|
| 16 | 0.0030 | 0.45 | 0.058 | 0.117 | S | 3  |
| 17 | 0.0026 | 0.39 | 0.058 | 0.900 | S | 3  |
| 18 | 0.0007 | 0.09 | 0.002 | 0.094 | S | 10 |

n.a. - not available.

**Table S9.** Loading results and variable importance in projection scores of variables from Principal Component Analysis (PCA) and Partial Least Squares Analysis (PLS) based on the relative peak areas of the identified VOCs in samples sugarcane-based syrups samples.

| Volatile Organic Compounds | Abbreviations | PCA    |        |        |                  |               |       | PLS   |       |                  |               |
|----------------------------|---------------|--------|--------|--------|------------------|---------------|-------|-------|-------|------------------|---------------|
|                            |               | 1      | 2      | 3      | VIP <sup>1</sup> |               | 1     | 2     | 3     | VIP <sup>1</sup> |               |
|                            |               |        |        |        | Importance       | Power (x 100) |       |       |       | Importance       | Power (x 100) |
| Pentane                    | PTANE         | -0.254 | -0.731 | 0.050  | 112              | 78.55         | -0.03 | -0.14 | 0.01  | 21               | 10.79         |
| Hexane                     | HXANE         | 0.026  | -0.253 | 0.145  | 110              | 80.04         | 0.00  | -0.05 | 0.03  | 12               | 11.76         |
| 1,4-Pentadiene             | PT14DIENE     | -0.065 | -0.904 | -0.026 | 50               | 94.19         | -0.01 | -0.17 | -0.01 | 98               | 6.05          |
| Ethanal                    | ETAL          | 0.900  | 0.001  | 0.232  | 34               | 95.60         | 0.12  | 0.00  | 0.06  | 116              | 5.40          |
| Dimethyl Sulfide           | DMSULFI       | -0.158 | -0.763 | -0.106 | 106              | 82.37         | -0.02 | -0.14 | -0.03 | 32               | 9.61          |
| Furan                      | FUR           | 0.244  | -0.062 | -0.130 | 134              | 55.20         | 0.03  | -0.01 | -0.03 | 15               | 11.50         |
| 2-Methyl-Propanal          | MPPAL         | 0.782  | 0.281  | -0.213 | 72               | 90.37         | 0.10  | 0.05  | -0.05 | 61               | 7.73          |
| Ethyl Formate              | EESTFA        | 0.363  | 0.280  | 0.237  | 136              | 51.32         | 0.05  | 0.05  | 0.06  | 17               | 11.06         |
| 2-Propenal                 | PPENAL        | 0.163  | -0.790 | 0.136  | 108              | 80.59         | 0.02  | -0.15 | 0.03  | 30               | 9.70          |
| 2-Methyl-Furan             | M2FUR         | 0.314  | -0.248 | -0.175 | 49               | 94.21         | 0.04  | -0.05 | -0.04 | 27               | 9.83          |
| Ethyl Acetate              | EESTAA        | 0.380  | 0.307  | 0.586  | 124              | 67.97         | 0.05  | 0.05  | 0.14  | 37               | 9.51          |
| 2-Methyl-Butanal           | M2BTAL        | 0.857  | 0.252  | -0.197 | 94               | 85.46         | 0.11  | 0.05  | -0.04 | 43               | 9.03          |
| 3-Methyl-Butanal           | M3BTAL        | 0.729  | 0.191  | -0.194 | 126              | 66.86         | 0.10  | 0.03  | -0.04 | 41               | 9.20          |
| Ethanol                    | ETOL          | 0.742  | 0.340  | -0.435 | 91               | 85.94         | 0.10  | 0.06  | -0.10 | 53               | 8.35          |
| Benzene                    | BNZ           | 0.490  | -0.787 | -0.096 | 84               | 87.55         | 0.06  | -0.15 | -0.02 | 56               | 8.13          |
| 2,5-Dimethyl-Furan         | DM25FUR       | 0.268  | -0.024 | 0.379  | 100              | 83.90         | 0.04  | -0.01 | 0.09  | 19               | 10.87         |
| Ethyl Propanoate           | EESTPA        | 0.142  | 0.153  | 0.947  | 2                | 99.00         | 0.02  | 0.02  | 0.23  | 97               | 6.21          |
| 2-Methylpropyl Acetate     | MP2ESTAA      | 0.064  | 0.120  | 0.934  | 30               | 96.00         | 0.01  | 0.02  | 0.23  | 90               | 6.60          |
| 1-Propanol                 | P1POL         | 0.037  | 0.135  | 0.922  | 48               | 94.25         | 0.00  | 0.02  | 0.23  | 77               | 6.91          |
| Toluene                    | TOLNE         | 0.416  | 0.134  | 0.042  | 140              | 40.09         | 0.06  | 0.02  | 0.01  | 9                | 12.22         |
| Ethyl Butanoate            | EESTBA        | 0.062  | 0.117  | 0.943  | 24               | 96.27         | 0.01  | 0.02  | 0.23  | 85               | 6.62          |

|                                                 |              |        |        |        |     |       |       |       |       |     |       |
|-------------------------------------------------|--------------|--------|--------|--------|-----|-------|-------|-------|-------|-----|-------|
| Dimethyl Disulfide                              | DMDSFD       | -0.274 | 0.141  | -0.175 | 137 | 49.62 | -0.04 | 0.03  | -0.04 | 14  | 11.58 |
| Hexanal                                         | HXAL         | 0.060  | -0.985 | 0.045  | 10  | 97.94 | 0.01  | -0.18 | 0.01  | 129 | 4.97  |
| 2-Methyl-1-Propanol                             | M2PP1OL      | 0.167  | 0.183  | 0.927  | 21  | 96.57 | 0.02  | 0.03  | 0.22  | 83  | 6.65  |
| 5-Butyl-Dihydro-2(3H)-Furanone                  | BDH2FURONE   | 0.295  | -0.897 | -0.063 | 29  | 96.03 | 0.04  | -0.17 | -0.02 | 109 | 5.61  |
| m-Cresol                                        | MCREOL       | 0.882  | 0.200  | -0.079 | 101 | 83.58 | 0.12  | 0.04  | -0.02 | 92  | 6.57  |
| 1-Butanol                                       | BT1OL        | 0.371  | 0.236  | 0.734  | 87  | 87.20 | 0.05  | 0.04  | 0.18  | 57  | 8.10  |
| 5-Propyl-Dihydro-2(3H)-Furanone                 | PDH2FURONE   | 0.173  | -0.961 | 0.004  | 14  | 97.51 | 0.02  | -0.18 | 0.00  | 127 | 5.02  |
| 3-Methyl-Pyridazine                             | M3PYRDZNE    | 0.881  | 0.234  | -0.052 | 95  | 85.43 | 0.12  | 0.04  | -0.01 | 96  | 6.26  |
| 2-Heptanone                                     | HPT2ONE      | -0.151 | 0.087  | -0.064 | 144 | 6.95  | -0.02 | 0.02  | -0.01 | 8   | 12.53 |
| m-Menthane                                      | MMTHANE      | 0.170  | -0.002 | -0.031 | 130 | 62.40 | 0.02  | 0.00  | -0.01 | 3   | 14.24 |
| 1,3-Diazine                                     | D13ZINE      | 0.001  | 0.067  | 0.438  | 97  | 84.45 | 0.00  | 0.01  | 0.10  | 22  | 9.98  |
| 2-Methyl-1-Butanol                              | M2BT1OL      | 0.315  | 0.298  | 0.609  | 105 | 82.49 | 0.04  | 0.05  | 0.15  | 50  | 8.66  |
| 2-Propyl-Furan                                  | PP2FUR       | 0.751  | 0.225  | -0.068 | 129 | 64.35 | 0.10  | 0.04  | -0.01 | 28  | 9.81  |
| Ethyl Hexanoate                                 | EESTHA       | 0.068  | 0.116  | 0.928  | 47  | 94.60 | 0.01  | 0.02  | 0.23  | 89  | 6.60  |
| 2-Pentyl-Furan                                  | PT2FUR       | 0.067  | -0.973 | 0.018  | 31  | 95.81 | 0.01  | -0.18 | 0.00  | 70  | 7.19  |
| 2-Methyl-Dihydro-2(3H)-Furanone                 | MDH2FURONE   | 0.710  | 0.227  | -0.345 | 116 | 75.37 | 0.09  | 0.04  | -0.08 | 45  | 8.96  |
| p-Cymene                                        | PCYMNE       | 0.346  | 0.306  | 0.769  | 73  | 89.84 | 0.05  | 0.05  | 0.19  | 75  | 7.00  |
| 3,5-Xylenol                                     | XYL35NOL     | 0.816  | 0.247  | -0.072 | 104 | 82.90 | 0.11  | 0.04  | -0.02 | 86  | 6.61  |
| 3-Hydroxy-2-Butanone                            | HXY3BT2ONE   | 0.902  | -0.336 | -0.034 | 45  | 94.70 | 0.12  | -0.06 | -0.01 | 113 | 5.48  |
| Vinylene Carbonate                              | VYLESTCA     | 0.977  | -0.013 | 0.064  | 23  | 96.47 | 0.13  | 0.00  | 0.02  | 112 | 5.49  |
| 2,6-Xylenol                                     | XYL26NOL     | 0.671  | 0.230  | -0.104 | 122 | 71.31 | 0.09  | 0.04  | -0.02 | 47  | 8.85  |
| 1-Hydroxy-2-Propanone                           | HXY1PP2ONE   | 0.574  | -0.524 | 0.263  | 120 | 72.83 | 0.08  | -0.10 | 0.06  | 46  | 8.91  |
| 2,5-Dimethyl-Pyrazine                           | DM25PYZNE    | 0.111  | 0.206  | -0.193 | 117 | 74.78 | 0.02  | 0.04  | -0.05 | 2   | 16.06 |
| 2,6-Dimethyl-Pyrazine                           | DM26PYZNE    | 0.571  | 0.316  | -0.157 | 114 | 76.08 | 0.08  | 0.06  | -0.04 | 49  | 8.77  |
| 2-Cyclopenten-1-one                             | CY2PT1EONE   | 0.514  | -0.819 | -0.055 | 3   | 98.59 | 0.07  | -0.15 | -0.01 | 134 | 4.86  |
| 1,2,3,4-Tetramethyl-4-(1-methylethenyl)-Benzene | TM4MEYL1BNZ  | 0.059  | -0.981 | 0.039  | 5   | 98.56 | 0.01  | -0.18 | 0.01  | 131 | 4.96  |
| 2-Methyl-2-Cyclopenten-1-one                    | M2CY2PT1EONE | 0.935  | -0.232 | -0.143 | 18  | 96.85 | 0.12  | -0.04 | -0.03 | 110 | 5.59  |
| 5-Methyl-2-Furanmethanethiol                    | M2FURTHOL    | 0.209  | 0.248  | 0.879  | 56  | 93.22 | 0.03  | 0.04  | 0.21  | 67  | 7.50  |
| 1-Hydroxy-2-Butanone                            | H1BT2ONE     | 0.658  | -0.604 | 0.008  | 99  | 84.04 | 0.09  | -0.11 | 0.00  | 76  | 7.00  |
| 2-Ethyl-6-Methyl-Pyrazine                       | E6MPYZNE     | 0.096  | 0.172  | -0.278 | 65  | 91.81 | 0.01  | 0.03  | -0.07 | 38  | 9.33  |
| 2-Ethyl-5-Methyl-Pyrazine                       | E5MPYZNE     | -0.230 | 0.045  | -0.171 | 52  | 94.12 | -0.03 | 0.01  | -0.04 | 35  | 9.57  |
| Nonanal                                         | NONAL        | 0.582  | 0.167  | -0.206 | 139 | 44.99 | 0.08  | 0.03  | -0.05 | 29  | 9.71  |
| Trimethyl-Pyrazine                              | TMPYZNE      | -0.230 | 0.045  | -0.172 | 51  | 94.12 | -0.03 | 0.01  | -0.04 | 34  | 9.57  |
| 3-Ethyl-2-Methyl-1,3-Hexadiene                  | E3M2HX13DENE | 0.067  | -0.981 | 0.041  | 4   | 98.58 | 0.01  | -0.18 | 0.01  | 132 | 4.94  |

|                                                |              |        |        |        |     |       |       |       |       |     |       |
|------------------------------------------------|--------------|--------|--------|--------|-----|-------|-------|-------|-------|-----|-------|
| 2-Cyclohexen-1-one                             | C2HEXONE     | 0.102  | -0.971 | 0.049  | 12  | 97.80 | 0.01  | -0.18 | 0.01  | 124 | 5.12  |
| 5-Methyl-2(3H)-Furanone                        | M5FURONE     | 0.952  | 0.054  | -0.039 | 58  | 92.91 | 0.13  | 0.01  | -0.01 | 108 | 5.63  |
| 1,3-Dihydro-4-Methyl-2H-Imidazol-2-one         | M4IMDZONE    | 0.900  | -0.358 | 0.011  | 37  | 95.41 | 0.12  | -0.07 | 0.00  | 136 | 4.81  |
| Ethyl Octanoate                                | EESTOA       | 0.068  | 0.117  | 0.936  | 28  | 96.05 | 0.01  | 0.02  | 0.23  | 88  | 6.60  |
| 1,2,3,4-Tetrahydro-1,1,6-Trimethyl-Naphthalene | T116TNP      | 0.035  | -0.962 | 0.029  | 44  | 94.72 | 0.00  | -0.18 | 0.00  | 80  | 6.82  |
| 1,2,3,4-Tetrahydro-1,6,8-Trimethyl-Naphthalene | T168TNP      | 0.163  | -0.917 | 0.018  | 71  | 90.84 | 0.02  | -0.17 | 0.00  | 66  | 7.50  |
| 2-Ethyl-1-Hexanol                              | E2HX1OL      | 0.223  | 0.074  | 0.929  | 35  | 95.44 | 0.03  | 0.01  | 0.23  | 84  | 6.63  |
| 3-Methyl-Furfural                              | M3FURAL      | -0.081 | 0.113  | -0.134 | 143 | 15.04 | -0.01 | 0.02  | -0.02 | 11  | 11.78 |
| Furfuryl Formate                               | FURYLFMTE    | 0.831  | 0.231  | 0.045  | 53  | 93.86 | 0.11  | 0.04  | 0.01  | 72  | 7.04  |
| Decanal                                        | DECAL        | 0.877  | 0.212  | -0.176 | 89  | 86.20 | 0.12  | 0.04  | -0.04 | 33  | 9.61  |
| 1-(2-Furanyl)-Ethanone                         | FURYLONE     | 0.740  | -0.115 | 0.344  | 93  | 85.50 | 0.10  | -0.02 | 0.08  | 58  | 8.10  |
| Benzaldehyde                                   | BENZAL       | 0.265  | -0.936 | 0.070  | 11  | 97.90 | 0.03  | -0.17 | 0.02  | 122 | 5.22  |
| Furfuryl Acetate                               | FURYLACTE    | 0.948  | 0.135  | -0.076 | 39  | 95.15 | 0.13  | 0.02  | -0.02 | 125 | 5.10  |
| Propanoic Acid                                 | PPANOIC      | 0.030  | -0.633 | 0.543  | 111 | 79.82 | 0.00  | -0.12 | 0.13  | 26  | 9.90  |
| Dimethyl Sulfoxide                             | DMSULFO      | 0.202  | -0.569 | 0.091  | 90  | 86.14 | 0.03  | -0.11 | 0.02  | 42  | 9.07  |
| 1,2,3,4-Tetrahydro-1,5,8-Trimethyl-Naphthalene | T158TNP      | 0.327  | -0.817 | 0.113  | 81  | 88.32 | 0.04  | -0.15 | 0.03  | 52  | 8.43  |
| 5-Methyl-Furfural                              | M5FURAL      | 0.734  | 0.262  | 0.209  | 92  | 85.63 | 0.10  | 0.05  | 0.05  | 60  | 7.93  |
| 4-Cyclopentene-1,3-dione                       | CPT4E13DONE  | 0.909  | -0.019 | 0.018  | 67  | 91.48 | 0.12  | 0.00  | 0.00  | 102 | 5.91  |
| 2-Methyl-Benzofuran                            | M2BNZFUR     | 0.885  | 0.253  | -0.139 | 64  | 91.89 | 0.12  | 0.05  | -0.03 | 91  | 6.57  |
| 1-(5-Methyl-2-Furanyl)-Ethanone                | M5FURYLONE   | 0.923  | 0.088  | -0.107 | 78  | 88.73 | 0.12  | 0.01  | -0.02 | 101 | 5.95  |
| Diethylene Glycol Ethyl Ether                  | DENGOLEETHR  | 0.669  | 0.275  | -0.068 | 119 | 73.05 | 0.09  | 0.05  | -0.02 | 44  | 9.01  |
| 3-Methyl-Dihydro-2(3H)-Furanone                | M3DHFURONE   | 0.513  | -0.737 | 0.244  | 76  | 89.11 | 0.07  | -0.14 | 0.06  | 40  | 9.22  |
| 2,3-Dihydro-1,1,4,6-Tetramethyl-1H-Indene      | DHT1146MIDNE | 0.047  | -0.926 | 0.004  | 70  | 90.95 | 0.01  | -0.17 | 0.00  | 79  | 6.83  |
| Benzeneacetaldehyde                            | BENZACETAL   | 0.926  | 0.198  | -0.013 | 55  | 93.26 | 0.12  | 0.04  | 0.00  | 104 | 5.80  |
| 3,5-Dimethyl-Dihydro-2-Furanone                | DM35DHFURONE | -0.182 | -0.107 | -0.131 | 142 | 23.36 | -0.02 | -0.02 | -0.03 | 4   | 14.09 |
| Ethyl Ester Decanoic Acid                      | EESTDA       | 0.068  | 0.117  | 0.936  | 26  | 96.10 | 0.01  | 0.02  | 0.23  | 87  | 6.61  |
| Acetophenone                                   | ACETPHONE    | 0.873  | -0.284 | -0.250 | 57  | 92.92 | 0.12  | -0.05 | -0.06 | 115 | 5.41  |
| 3-Furanmethanol                                | FUR3OL       | 0.521  | 0.156  | -0.153 | 138 | 46.31 | 0.07  | 0.03  | -0.03 | 7   | 12.56 |
| 2,3-Dihydro-1,1,5,6-Tetramethyl-1H-Indene      | DHT1156MIDNE | 0.067  | -0.938 | 0.054  | 68  | 91.23 | 0.01  | -0.17 | 0.01  | 81  | 6.74  |
| 2-(2-Furanylmethyl)-5-Methyl-Furan             | FURYLMFUR    | 0.891  | 0.239  | -0.237 | 60  | 92.42 | 0.12  | 0.04  | -0.06 | 99  | 6.01  |
| 5-Methyl-2-Furanmethanol                       | M5FUR2OL     | 0.874  | -0.238 | -0.098 | 80  | 88.58 | 0.12  | -0.05 | -0.02 | 59  | 7.98  |
| Benzyl Acetate                                 | PMESTAA      | 0.193  | 0.183  | 0.910  | 19  | 96.76 | 0.03  | 0.03  | 0.22  | 65  | 7.54  |
| 2(5H)-Furanone                                 | FURONE       | 0.839  | -0.240 | 0.005  | 107 | 81.85 | 0.11  | -0.05 | 0.00  | 64  | 7.56  |
| 2,2'-Methylenebis[5-Methyl-Furan               | MNEB5MFUR    | 0.840  | 0.273  | -0.079 | 83  | 87.86 | 0.11  | 0.05  | -0.02 | 74  | 7.04  |

|                                       |              |        |        |        |     |       |       |       |       |     |       |
|---------------------------------------|--------------|--------|--------|--------|-----|-------|-------|-------|-------|-----|-------|
| 1,2-Cyclopentanedione                 | CPT12DONE    | 0.838  | -0.115 | 0.004  | 113 | 78.44 | 0.11  | -0.02 | 0.00  | 55  | 8.18  |
| 2-Cyclohexenol                        | CHEX2E1OL    | 0.977  | 0.134  | -0.077 | 13  | 97.78 | 0.13  | 0.02  | -0.02 | 142 | 4.00  |
| 3-Methyl-1,2-Cyclopentanedione        | M3CPT12DONE  | 0.895  | -0.419 | -0.039 | 1   | 99.15 | 0.12  | -0.08 | -0.01 | 144 | 3.93  |
| 2-Ethyl-Hexanoic Acid                 | E2HXNOIC     | -0.219 | -0.367 | 0.004  | 127 | 66.09 | -0.03 | -0.07 | 0.00  | 5   | 13.32 |
| $\beta$ -Damascenone                  | DAMSNONE     | 0.741  | 0.024  | -0.313 | 109 | 80.57 | 0.10  | 0.00  | -0.07 | 31  | 9.69  |
| Ethyl Undecanoate                     | EESTUNDA     | 0.033  | 0.105  | 0.918  | 74  | 89.49 | 0.00  | 0.02  | 0.22  | 73  | 7.04  |
| 2-Methyl-Propanoic Acid               | M2PPOICA     | 0.571  | -0.786 | 0.146  | 15  | 97.30 | 0.08  | -0.15 | 0.03  | 137 | 4.66  |
| 2,4,6-Trihydroxypyrimidine            | THDXYPYMNE   | 0.823  | 0.277  | -0.245 | 75  | 89.13 | 0.11  | 0.05  | -0.06 | 107 | 5.74  |
| Mequinol                              | MEQNOL       | 0.800  | 0.246  | -0.098 | 86  | 87.21 | 0.11  | 0.04  | -0.02 | 51  | 8.59  |
| 2,2-Diethyl-3-Methyl-Oxazolidine      | DEMOXZDNE    | 0.857  | 0.215  | 0.171  | 69  | 91.08 | 0.11  | 0.04  | 0.04  | 93  | 6.54  |
| Oxypurinol                            | OXYPUROL     | 0.947  | 0.198  | -0.039 | 41  | 95.01 | 0.13  | 0.04  | -0.01 | 103 | 5.90  |
| Benzenemethanol                       | BENZMTOL     | 0.484  | 0.131  | 0.330  | 98  | 84.08 | 0.06  | 0.02  | 0.08  | 23  | 9.96  |
| 4-Methyl-2(5H)-Furanone               | M4FUR2ONE    | 0.924  | -0.264 | -0.165 | 25  | 96.21 | 0.12  | -0.05 | -0.04 | 140 | 4.51  |
| 3-Ethyl-2-Hydroxy-2-Cyclopenten-1-one | E3H2C2PT1ONE | 0.724  | -0.574 | -0.215 | 46  | 94.70 | 0.10  | -0.11 | -0.05 | 111 | 5.58  |
| Benzeneethanol                        | BENZETOL     | 0.020  | 0.082  | 0.919  | 82  | 88.06 | 0.00  | 0.01  | 0.22  | 48  | 8.80  |
| Acrylamide                            | ACRYLMDE     | 0.863  | 0.284  | 0.214  | 77  | 89.00 | 0.11  | 0.05  | 0.05  | 63  | 7.65  |
| Erythritol                            | ERYTOL       | 0.630  | -0.727 | 0.150  | 32  | 95.76 | 0.08  | -0.14 | 0.04  | 119 | 5.26  |
| 2,3-Dimethyl-3-Pyrazolin-5-one        | DM23PYZLONE  | 0.961  | -0.127 | -0.004 | 27  | 96.07 | 0.13  | -0.02 | 0.00  | 138 | 4.59  |
| Furfural Acetone                      | FURALTONE    | 0.977  | 0.079  | -0.094 | 6   | 98.21 | 0.13  | 0.01  | -0.02 | 143 | 3.94  |
| Cyclotene                             | CYTENE       | 0.956  | -0.063 | -0.025 | 38  | 95.24 | 0.13  | -0.01 | 0.00  | 117 | 5.33  |
| 2-Methyl-1,4-Benzenediol              | M2BNZ14DIOL  | 0.864  | 0.165  | -0.072 | 42  | 94.98 | 0.11  | 0.03  | -0.01 | 82  | 6.68  |
| Heptanoic Acid                        | HPTOIC       | 0.056  | -0.979 | 0.038  | 9   | 98.08 | 0.01  | -0.18 | 0.01  | 120 | 5.24  |
| Maltol                                | MALTOL       | 0.901  | 0.272  | 0.233  | 33  | 95.67 | 0.12  | 0.05  | 0.06  | 126 | 5.09  |
| 2-Acetylpyrrole                       | ACTLPYROLE   | 0.804  | 0.289  | -0.139 | 88  | 86.75 | 0.11  | 0.05  | -0.03 | 78  | 6.86  |
| 2,5-Furandicarboxaldehyde             | FUR25DIAL    | 0.920  | 0.260  | -0.143 | 40  | 95.13 | 0.12  | 0.05  | -0.03 | 135 | 4.82  |
| 2H-Pyran-2,6(3H)-Dione                | PYR26DIONE   | 0.884  | 0.272  | 0.106  | 66  | 91.73 | 0.12  | 0.05  | 0.03  | 71  | 7.10  |
| 1-(2-Furanyl)-2-Hydroxy-Ethanone      | H2FURLONE    | 0.654  | 0.211  | 0.219  | 125 | 67.73 | 0.09  | 0.04  | 0.05  | 39  | 9.32  |
| Phenol                                | PHEOL        | 0.819  | -0.441 | -0.111 | 63  | 91.98 | 0.11  | -0.08 | -0.03 | 100 | 5.95  |
| 1H-Pyrrole-2-Carboxaldehyde           | PYRLE2AL     | 0.727  | -0.593 | -0.166 | 59  | 92.66 | 0.10  | -0.11 | -0.04 | 105 | 5.78  |
| Phloroglucinol                        | PHLOGLNOL    | 0.913  | 0.189  | 0.233  | 43  | 94.82 | 0.12  | 0.03  | 0.06  | 130 | 4.96  |
| Furaneol                              | FUREOL       | 0.627  | -0.370 | 0.279  | 128 | 64.81 | 0.08  | -0.07 | 0.06  | 24  | 9.95  |
| Octanoic Acid                         | OCTOIC       | 0.159  | -0.954 | 0.007  | 20  | 96.71 | 0.02  | -0.18 | 0.00  | 118 | 5.33  |
| 5-Acetyl-Dihydro-2(3H)-Furanone       | ACYLDHFURONE | 0.828  | -0.343 | 0.134  | 96  | 84.60 | 0.11  | -0.06 | 0.03  | 68  | 7.26  |
| 2-Furanpropionic Acid                 | FURPPIONIC   | 0.927  | 0.244  | -0.053 | 36  | 95.42 | 0.12  | 0.04  | -0.01 | 121 | 5.24  |

|                                           |               |        |        |        |     |       |       |       |       |     |       |
|-------------------------------------------|---------------|--------|--------|--------|-----|-------|-------|-------|-------|-----|-------|
| 1,3-Dihydroxy-2-Propanone                 | DHYPPAONE     | -0.075 | -0.292 | 0.297  | 115 | 75.70 | -0.01 | -0.06 | 0.07  | 13  | 11.74 |
| Tetrahydro-5-Methyl-2-Furanmethanol       | TEHYMFUROL    | -0.414 | -0.379 | 0.433  | 118 | 73.62 | -0.06 | -0.07 | 0.10  | 18  | 11.01 |
| 2-Hydroxy-Dihydro-2(3H)-Furanone          | HY2DHFURONE   | -0.511 | -0.163 | 0.311  | 135 | 53.19 | -0.07 | -0.03 | 0.07  | 20  | 10.86 |
| 5-Acetoxyethyl-2-Furfural A               | ACTYMFURALA   | 0.696  | 0.307  | 0.290  | 103 | 82.98 | 0.09  | 0.05  | 0.07  | 54  | 8.29  |
| 5-Acetoxyethyl-2-Furfural B               | ACTYMFURALB   | 0.839  | 0.261  | 0.139  | 79  | 88.70 | 0.11  | 0.05  | 0.03  | 95  | 6.32  |
| 2-Methoxy-4-Vinyl-Phenol                  | MXY2VYL4PHEOL | 0.942  | 0.121  | -0.054 | 61  | 92.28 | 0.12  | 0.02  | -0.01 | 133 | 4.89  |
| 3-Methyl-2,4(3H,5H)-Furandione            | M3FURDIONE    | 0.985  | 0.081  | -0.055 | 7   | 98.20 | 0.13  | 0.01  | -0.01 | 141 | 4.42  |
| 3-Hydroxy-2,3-Dihydro-Maltol              | HX3DH23MALTOL | 0.100  | -0.585 | 0.246  | 133 | 56.55 | 0.01  | -0.11 | 0.06  | 10  | 12.00 |
| Decanoic Acid                             | DECOIC        | 0.175  | -0.957 | 0.079  | 17  | 97.17 | 0.02  | -0.18 | 0.02  | 123 | 5.15  |
| 5-Hydroxy-Maltol                          | HX5MALTOL     | 0.912  | 0.126  | -0.085 | 54  | 93.32 | 0.12  | 0.02  | -0.02 | 69  | 7.20  |
| 2,3-Dihydro-Benzofuran                    | DHBNZFUR      | 0.840  | 0.029  | -0.062 | 102 | 83.20 | 0.11  | 0.00  | -0.01 | 94  | 6.37  |
| 1,4:3,6-Dianhydro-.alpha.-d-Glucopyranose | GLUPYROSE     | 0.750  | -0.489 | 0.041  | 85  | 87.40 | 0.10  | -0.09 | 0.01  | 62  | 7.66  |
| 4-Pyridinol                               | PYRDINOL      | 0.905  | 0.242  | -0.258 | 22  | 96.57 | 0.12  | 0.04  | -0.06 | 139 | 4.55  |
| 4-Amino-Phenol                            | AMIPHEOL      | 0.861  | 0.231  | 0.055  | 16  | 97.25 | 0.11  | 0.04  | 0.01  | 106 | 5.75  |
| Benzoic Acid                              | BNZOIC        | 0.269  | -0.930 | 0.056  | 8   | 98.18 | 0.04  | -0.17 | 0.01  | 128 | 4.99  |
| 5-(Hydroxymethyl)-Dihydro-2(3H)-Furanone  | HM5FURONE     | 0.703  | 0.083  | 0.055  | 132 | 60.18 | 0.09  | 0.01  | 0.01  | 36  | 9.56  |
| Dodecanoic Acid                           | DODECOIC      | 0.748  | -0.069 | -0.056 | 131 | 61.80 | 0.10  | -0.01 | -0.01 | 25  | 9.95  |
| 5-(Hydroxymethyl)-2-Furfural              | HM5FURAL      | 0.107  | 0.611  | -0.141 | 123 | 69.81 | 0.01  | 0.11  | -0.04 | 6   | 12.56 |
| 3-Methoxy-1,2-Benzenediol                 | M3BNZDIOL     | 0.890  | 0.219  | -0.249 | 62  | 92.06 | 0.12  | 0.04  | -0.06 | 114 | 5.45  |
| 1-(2-Furanyl)-1,2-Ethanediol              | FURYLETDIOL   | 0.048  | -0.264 | 0.282  | 121 | 71.33 | 0.01  | -0.05 | 0.07  | 16  | 11.49 |
| 4-Hydroxy-Dihydro-2(3H)-Furanone          | DHYHYFURONE   | 0.523  | 0.078  | 0.080  | 141 | 38.18 | 0.07  | 0.01  | 0.02  | 1   | 16.66 |

<sup>1</sup>VIP - Variable Importance in Projection scores.

**Table S10.** Loading results of samples and variables from Principal Component Analysis (PCA) and Partial Least Squares Analysis (PLS) based on the relative peak areas of the identified VOCs in sugarcane-based syrups samples.

| ID Sample Code | ID Group Code | PCA  |      |       | PLS  |      |      |
|----------------|---------------|------|------|-------|------|------|------|
|                |               | 1    | 2    | 3     | 1    | 2    | 3    |
| FRS07          | CERT          | 0.01 | 0.07 | -0.06 | n.a. | n.a. | n.a. |
| FRS13          | CERT          | 0.21 | 0.14 | 0.14  | n.a. | n.a. | n.a. |
| FRS14          | CERT          | 0.35 | 0.08 | -0.06 | n.a. | n.a. | n.a. |
| FRS15          | CERT          | 0.53 | 0.10 | -0.22 | n.a. | n.a. | n.a. |

|                  |       |       |       |       |       |       |       |
|------------------|-------|-------|-------|-------|-------|-------|-------|
| FRS16            | CERT  | -0.08 | 0.10  | -0.06 | n.a.  | n.a.  | n.a.  |
| FRS17            | CERT  | -0.03 | 0.10  | -0.09 | n.a.  | n.a.  | n.a.  |
| FRS18            | CERT  | 0.48  | 0.05  | -0.18 | n.a.  | n.a.  | n.a.  |
| ECAL14           | NCERT | -0.15 | 0.09  | -0.06 | n.a.  | n.a.  | n.a.  |
| ENCAL14          | NCERT | -0.32 | 0.08  | -0.13 | n.a.  | n.a.  | n.a.  |
| GLA14            | NCERT | 0.07  | 0.12  | 0.94  | n.a.  | n.a.  | n.a.  |
| ESP16            | MED   | -0.23 | 0.02  | -0.05 | n.a.  | n.a.  | n.a.  |
| EGP17            | MED   | -0.05 | -0.01 | 0.06  | n.a.  | n.a.  | n.a.  |
| EGPA16           | MED   | -0.08 | -0.01 | 0.01  | n.a.  | n.a.  | n.a.  |
| EGPB16           | MED   | -0.18 | 0.01  | -0.04 | n.a.  | n.a.  | n.a.  |
| EGPC16           | MED   | -0.25 | 0.03  | -0.06 | n.a.  | n.a.  | n.a.  |
| MCBR14           | STH   | -0.13 | -0.04 | 0.00  | n.a.  | n.a.  | n.a.  |
| MDBR14           | STH   | 0.07  | -0.98 | 0.04  | n.a.  | n.a.  | n.a.  |
| AUS17            | STH   | -0.23 | 0.05  | -0.17 | n.a.  | n.a.  | n.a.  |
| Centroid (CERT)  | CERT  | n.a.  | n.a.  | n.a.  | 0.09  | 0.06  | -0.06 |
| Centroid (NCERT) | NCERT | n.a.  | n.a.  | n.a.  | -0.03 | 0.03  | 0.12  |
| Centroid (MED)   | MED   | n.a.  | n.a.  | n.a.  | -0.05 | 0.01  | -0.01 |
| Centroid (STH)   | STH   | n.a.  | n.a.  | n.a.  | -0.02 | -0.11 | -0.02 |

n.a. – not available.

**Table S11.** Scores results of all cases from Principal Component Analysis (PCA) and Partial Least Squares Analysis (PLS) based on the relative peak areas of the identified VOCs in sugarcane-based syrups samples.

| ID Replicate<br>Number | ID Replicate<br>Code | PCA  |        |      | PLS  |        |      |
|------------------------|----------------------|------|--------|------|------|--------|------|
|                        |                      | 1    | 2      | 3    | 1    | 2      | 3    |
| 1                      | S1-15A               | 6.71 | -0.90  | 0.26 | 6.73 | -1.39  | 0.24 |
| 2                      | S1-15B               | 6.74 | -1.30  | 0.38 | 6.76 | -1.80  | 0.37 |
| 3                      | S1-15C               | 6.73 | -1.10  | 0.32 | 6.74 | -1.60  | 0.31 |
| 4                      | S1-16A               | 6.95 | -3.41  | 0.22 | 6.97 | -3.76  | 0.19 |
| 5                      | S1-16B               | 6.94 | -3.38  | 0.20 | 6.96 | -3.73  | 0.17 |
| 6                      | S1-16C               | 6.95 | -3.40  | 0.21 | 6.96 | -3.75  | 0.18 |
| 7                      | S1-17A               | 8.29 | -12.36 | 1.66 | 8.31 | -12.09 | 1.51 |
| 8                      | S1-17B               | 8.13 | -11.06 | 1.53 | 8.15 | -10.80 | 1.39 |

|    |        |      |        |       |      |        |       |
|----|--------|------|--------|-------|------|--------|-------|
| 9  | S1-17C | 8.21 | -11.71 | 1.60  | 8.23 | -11.45 | 1.45  |
| 10 | S1-18A | 7.45 | -10.41 | -0.15 | 7.47 | -10.29 | -0.21 |
| 11 | S1-18B | 7.40 | -9.25  | -0.14 | 7.42 | -9.14  | -0.20 |
| 12 | S1-18C | 7.43 | -9.83  | -0.14 | 7.44 | -9.71  | -0.21 |
| 13 | S2-15A | 6.50 | -0.20  | 0.59  | 6.51 | -0.18  | 0.55  |
| 14 | S2-15B | 6.52 | 0.13   | 0.56  | 6.53 | 0.14   | 0.52  |
| 15 | S2-15C | 6.51 | -0.04  | 0.57  | 6.52 | -0.02  | 0.54  |
| 16 | S2-16A | 6.11 | 1.26   | 0.05  | 6.12 | 1.21   | 0.05  |
| 17 | S2-16B | 6.04 | 1.12   | 0.01  | 6.05 | 1.08   | 0.01  |
| 18 | S2-16C | 6.07 | 1.19   | 0.03  | 6.08 | 1.14   | 0.03  |
| 19 | S2-17A | 6.65 | -0.04  | 0.46  | 6.66 | 0.01   | 0.43  |
| 20 | S2-17B | 6.64 | 0.00   | 0.44  | 6.64 | 0.05   | 0.41  |
| 21 | S2-17C | 6.65 | -0.02  | 0.45  | 6.65 | 0.03   | 0.42  |
| 22 | S2-18A | 6.36 | 1.20   | -0.09 | 6.37 | 1.17   | -0.09 |
| 23 | S2-18B | 6.38 | 0.94   | -0.10 | 6.38 | 0.91   | -0.10 |
| 24 | S2-18C | 6.37 | 1.07   | -0.10 | 6.37 | 1.04   | -0.10 |
| 25 | S3-15A | 4.20 | 2.73   | 0.21  | 4.20 | 2.83   | 0.22  |
| 26 | S3-15B | 4.26 | 2.71   | 0.26  | 4.26 | 2.81   | 0.28  |
| 27 | S3-15C | 4.23 | 2.72   | 0.23  | 4.23 | 2.82   | 0.25  |
| 28 | S3-16A | 3.39 | 3.58   | 0.27  | 3.40 | 3.64   | 0.30  |
| 29 | S3-16B | 3.27 | 3.72   | 0.31  | 3.28 | 3.78   | 0.34  |
| 30 | S3-16C | 3.33 | 3.65   | 0.29  | 3.34 | 3.71   | 0.32  |
| 31 | S3-17A | 3.89 | 3.36   | 0.31  | 3.89 | 3.44   | 0.33  |
| 32 | S3-17B | 3.71 | 3.45   | 0.24  | 3.71 | 3.52   | 0.26  |
| 33 | S3-17C | 3.80 | 3.41   | 0.28  | 3.80 | 3.48   | 0.30  |
| 34 | S3-18A | 3.68 | 3.33   | 0.23  | 3.68 | 3.41   | 0.26  |
| 35 | S3-18B | 3.64 | 3.31   | 0.17  | 3.65 | 3.38   | 0.20  |
| 36 | S3-18C | 3.66 | 3.32   | 0.20  | 3.66 | 3.39   | 0.23  |
| 37 | S4-15A | 1.55 | 4.01   | 0.56  | 1.56 | 4.07   | 0.58  |
| 38 | S4-15B | 2.35 | 3.83   | 0.47  | 2.36 | 3.89   | 0.49  |
| 39 | S4-15C | 1.95 | 3.92   | 0.52  | 1.96 | 3.98   | 0.54  |
| 40 | S4-16A | 3.06 | 3.51   | 0.27  | 3.06 | 3.58   | 0.28  |
| 41 | S4-16B | 2.66 | 3.67   | 0.36  | 2.66 | 3.74   | 0.38  |
| 42 | S4-16C | 2.86 | 3.59   | 0.31  | 2.86 | 3.66   | 0.33  |

|    |        |        |       |        |        |       |        |
|----|--------|--------|-------|--------|--------|-------|--------|
| 43 | S4-17A | 3.78   | 3.09  | 0.00   | 3.78   | 3.17  | 0.03   |
| 44 | S4-17B | 3.59   | 3.21  | -0.06  | 3.58   | 3.30  | -0.03  |
| 45 | S4-17C | 3.69   | 3.15  | -0.03  | 3.68   | 3.23  | 0.00   |
| 46 | S4-18A | 3.18   | 3.48  | -0.02  | 3.18   | 3.55  | 0.01   |
| 47 | S4-18B | 2.84   | 3.51  | 0.03   | 2.84   | 3.58  | 0.06   |
| 48 | S4-18C | 3.01   | 3.50  | 0.01   | 3.01   | 3.56  | 0.03   |
| 49 | S5-15A | -9.18  | 1.46  | -2.55  | -9.32  | 1.28  | -2.51  |
| 50 | S5-15B | -10.59 | 1.31  | -2.61  | -10.72 | 1.13  | -2.57  |
| 51 | S5-15C | -9.89  | 1.38  | -2.58  | -10.02 | 1.20  | -2.54  |
| 52 | S5-16A | -20.09 | -1.99 | -12.39 | -20.14 | -1.90 | -11.98 |
| 53 | S5-16B | -17.36 | -1.72 | -11.78 | -17.41 | -1.63 | -11.35 |
| 54 | S5-16C | -18.72 | -1.85 | -12.08 | -18.77 | -1.76 | -11.66 |
| 55 | S5-17A | -25.33 | -2.03 | -1.50  | -25.32 | -1.99 | -1.39  |
| 56 | S5-17B | -24.97 | -1.89 | -1.81  | -24.96 | -1.85 | -1.72  |
| 57 | S5-17C | -25.15 | -1.96 | -1.66  | -25.14 | -1.92 | -1.56  |
| 58 | S5-18A | -25.18 | -0.78 | 10.67  | -25.13 | -0.83 | 10.23  |
| 59 | S5-18B | -30.16 | -1.21 | 12.44  | -30.10 | -1.26 | 12.07  |
| 60 | S5-18C | -27.67 | -0.99 | 11.56  | -27.61 | -1.05 | 11.15  |

**Table S12.** Canonical Discriminant Function Coefficients and Highest Probability Classification results of samples from Linear Discriminant Analysis (LDA) after matrix reduction method obtained from One-way ANOVA test based on the relative peak areas of identified VOCs in sugarcane-based syrups samples.

| ID Replicate Code | ID Group Code | LDA              |      |      |                              |      |      |                                    |        |       | PLS         |       |       |               |      |      |
|-------------------|---------------|------------------|------|------|------------------------------|------|------|------------------------------------|--------|-------|-------------|-------|-------|---------------|------|------|
|                   |               | CDF <sup>1</sup> |      |      | CDF <sup>1</sup> Class Means |      |      | Highest Probability Classification |        |       | Score Value |       |       | Loading Value |      |      |
|                   |               | 1                | 2    | 3    | 1                            | 2    | 3    | First                              | Second | Third | 1           | 2     | 3     | 1             | 2    | 3    |
| FRS07A            | CERT          | -367.3           | -4.6 | -2.0 | -367.5                       | -4.8 | -2.6 | CERT                               | MED    | STH   | 1.51        | 0.73  | -0.09 | 0.18          | 0.04 | 0.02 |
| FRS07B            |               | -367.4           | -5.2 | -2.0 |                              |      |      | CERT                               | MED    | STH   | 2.15        | 0.57  | -0.21 |               |      |      |
| FRS07C            |               | -367.4           | -4.9 | -2.0 |                              |      |      | CERT                               | MED    | STH   | 1.83        | 0.65  | -0.15 |               |      |      |
| FRS13A            |               | -367.3           | -4.8 | -1.9 |                              |      |      | CERT                               | MED    | STH   | 5.66        | -0.03 | -0.35 |               |      |      |
| FRS13B            |               | -367.8           | -4.9 | -3.4 |                              |      |      | CERT                               | MED    | STH   | 4.50        | 0.26  | -0.17 |               |      |      |
| FRS13C            |               | -367.6           | -4.8 | -2.6 |                              |      |      | CERT                               | MED    | STH   | 5.08        | 0.11  | -0.26 |               |      |      |

|          |       |        |       |      |       |       |      |       |       |     |       |       |       |       |      |       |
|----------|-------|--------|-------|------|-------|-------|------|-------|-------|-----|-------|-------|-------|-------|------|-------|
| FRS14A   |       | -367.5 | -4.6  | -1.9 |       |       |      | CERT  | MED   | STH | 7.78  | -0.58 | -0.11 |       |      |       |
| FRS14B   |       | -367.6 | -5.0  | -3.0 |       |       |      | CERT  | MED   | STH | 7.80  | -0.45 | -0.12 |       |      |       |
| FRS14C   |       | -367.5 | -4.8  | -2.4 |       |       |      | CERT  | MED   | STH | 7.79  | -0.52 | -0.11 |       |      |       |
| FRS15A   |       | -367.3 | -5.5  | -2.4 |       |       |      | CERT  | MED   | STH | 8.87  | -0.55 | 0.01  |       |      |       |
| FRS15B   |       | -367.7 | -4.4  | -3.0 |       |       |      | CERT  | MED   | STH | 11.10 | -0.93 | -0.08 |       |      |       |
| FRS15C   |       | -367.5 | -4.9  | -2.7 |       |       |      | CERT  | MED   | STH | 9.99  | -0.74 | -0.04 |       |      |       |
| FRS16A   |       | -366.7 | -5.7  | -3.4 |       |       |      | CERT  | MED   | STH | 0.38  | 1.23  | 0.48  |       |      |       |
| FRS16B   |       | -368.4 | -4.2  | -2.1 |       |       |      | CERT  | MED   | STH | 0.84  | 1.16  | 0.46  |       |      |       |
| FRS16C   |       | -367.6 | -4.9  | -2.8 |       |       |      | CERT  | MED   | STH | 0.61  | 1.19  | 0.47  |       |      |       |
| FRS17A   |       | -367.6 | -3.6  | -1.4 |       |       |      | CERT  | MED   | STH | 0.85  | 1.01  | 0.35  |       |      |       |
| FRS17B   |       | -367.5 | -5.9  | -4.7 |       |       |      | CERT  | MED   | STH | 1.72  | 0.82  | 0.33  |       |      |       |
| FRS17C   |       | -367.6 | -4.8  | -3.1 |       |       |      | CERT  | MED   | STH | 1.28  | 0.92  | 0.34  |       |      |       |
| FRS18A   |       | -367.8 | -4.4  | -2.4 |       |       |      | CERT  | MED   | STH | 8.01  | 0.13  | 0.20  |       |      |       |
| FRS18B   |       | -367.4 | -5.2  | -2.8 |       |       |      | CERT  | MED   | STH | 10.18 | -0.02 | 0.21  |       |      |       |
| FRS18C   |       | -367.6 | -4.8  | -2.6 |       |       |      | CERT  | MED   | STH | 9.09  | 0.05  | 0.20  |       |      |       |
| ECAL14A  |       | 189.2  | -31.1 | 43.8 |       |       |      | NCERT | MED   | STH | -2.31 | 2.92  | 3.48  |       |      |       |
| ECAL14B  |       | 189.0  | -29.4 | 44.2 |       |       |      | NCERT | MED   | STH | -2.60 | 2.81  | 3.27  |       |      |       |
| ECAL14C  |       | 189.1  | -30.2 | 44.0 |       |       |      | NCERT | MED   | STH | -2.46 | 2.87  | 3.37  |       |      |       |
| ENCAL14A |       | 192.3  | -27.6 | 44.2 |       |       |      | NCERT | MED   | STH | -4.85 | 2.48  | 2.10  |       |      |       |
| ENCAL14B | NCERT | 185.6  | -32.6 | 42.8 | 189.1 | -30.2 | 43.7 | NCERT | MED   | STH | -4.83 | 2.47  | 2.10  | -0.05 | 0.22 | 0.34  |
| ENCAL14C |       | 189.0  | -30.1 | 43.5 |       |       |      | NCERT | MED   | STH | -4.84 | 2.48  | 2.10  |       |      |       |
| GLA14A   |       | 189.8  | -31.3 | 43.4 |       |       |      | NCERT | MED   | STH | -0.56 | 0.93  | 0.43  |       |      |       |
| GLA14B   |       | 188.4  | -29.3 | 44.0 |       |       |      | NCERT | MED   | STH | -0.87 | 0.88  | 0.40  |       |      |       |
| GLA14C   |       | 189.1  | -30.3 | 43.7 |       |       |      | NCERT | MED   | STH | -0.71 | 0.91  | 0.41  |       |      |       |
| ESP16A   |       | 217.2  | 75.4  | -5.2 |       |       |      | MED   | NCERT | STH | -3.88 | 1.07  | -0.76 |       |      |       |
| ESP16B   |       | 217.2  | 74.8  | -9.3 |       |       |      | MED   | NCERT | STH | -3.95 | 1.09  | -0.70 |       |      |       |
| ESP16C   |       | 217.2  | 75.1  | -7.2 |       |       |      | MED   | NCERT | STH | -3.91 | 1.08  | -0.73 |       |      |       |
| EGP17A   |       | 219.3  | 71.9  | -5.0 |       |       |      | MED   | NCERT | STH | -2.42 | 0.22  | -2.38 |       |      |       |
| EGP17B   |       | 215.2  | 77.7  | -9.1 |       |       |      | MED   | NCERT | STH | -2.17 | -0.05 | -2.50 |       |      |       |
| EGP17C   | MED   | 217.3  | 74.8  | -7.0 | 217.1 | 75.0  | -7.0 | MED   | NCERT | STH | -2.29 | 0.08  | -2.44 | -0.09 | 0.06 | -0.50 |
| EGPA16A  |       | 216.9  | 76.2  | -5.8 |       |       |      | MED   | NCERT | STH | -2.80 | 0.19  | -2.65 |       |      |       |
| EGPA16B  |       | 216.8  | 74.7  | -8.6 |       |       |      | MED   | NCERT | STH | -2.81 | 0.29  | -2.95 |       |      |       |
| EGPA16C  |       | 216.8  | 75.4  | -7.2 |       |       |      | MED   | NCERT | STH | -2.81 | 0.24  | -2.80 |       |      |       |
| EGPB16A  |       | 217.8  | 74.2  | -6.6 |       |       |      | MED   | NCERT | STH | -3.73 | 0.02  | -2.77 |       |      |       |

|         |     |       |       |       |       |       |       |     |       |       |       |       |       |       |       |      |
|---------|-----|-------|-------|-------|-------|-------|-------|-----|-------|-------|-------|-------|-------|-------|-------|------|
| EGPB16B |     | 216.7 | 75.8  | -7.2  |       |       |       | MED | NCERT | STH   | -3.59 | 0.13  | -2.60 |       |       |      |
| EGPB16C |     | 217.3 | 75.0  | -6.9  |       |       |       | MED | NCERT | STH   | -3.66 | 0.08  | -2.69 |       |       |      |
| EGPC16A |     | 219.7 | 75.3  | -9.0  |       |       |       | MED | NCERT | STH   | -4.27 | 0.64  | -1.69 |       |       |      |
| EGPC16B |     | 214.6 | 73.8  | -4.5  |       |       |       | MED | NCERT | STH   | -4.35 | 0.84  | -1.51 |       |       |      |
| EGPC16C |     | 217.2 | 74.6  | -6.8  |       |       |       | MED | NCERT | STH   | -4.31 | 0.74  | -1.60 |       |       |      |
| MCBR14A |     | 306.0 | -82.6 | -25.8 |       |       |       | STH | MED   | NCERT | -3.24 | -2.55 | 1.40  |       |       |      |
| MCBR14B |     | 307.1 | -84.4 | -26.4 |       |       |       | STH | MED   | NCERT | -3.02 | -2.69 | 1.27  |       |       |      |
| MCBR14C |     | 306.6 | -83.5 | -26.1 |       |       |       | STH | MED   | NCERT | -3.13 | -2.62 | 1.34  |       |       |      |
| MDBR14A |     | 306.1 | -82.4 | -24.3 |       |       |       | STH | MED   | NCERT | -3.59 | -7.09 | 1.31  |       |       |      |
| MDBR14B | STH | 307.1 | -84.6 | -27.8 | 306.6 | -83.4 | -26.0 | STH | MED   | NCERT | -3.71 | -6.96 | 1.22  | -0.07 | -0.35 | 0.23 |
| MDBR14C |     | 306.6 | -83.5 | -26.1 |       |       |       | STH | MED   | NCERT | -3.65 | -7.02 | 1.27  |       |       |      |
| AUS17A  |     | 307.4 | -84.6 | -25.5 |       |       |       | STH | MED   | NCERT | -3.81 | -0.56 | 1.32  |       |       |      |
| AUS17B  |     | 305.9 | -82.0 | -26.1 |       |       |       | STH | MED   | NCERT | -3.99 | -0.45 | 1.33  |       |       |      |
| AUS17C  |     | 306.6 | -83.3 | -25.8 |       |       |       | STH | MED   | NCERT | -3.90 | -0.50 | 1.33  |       |       |      |

<sup>1</sup>CDF - Canonical Discriminant Function Coefficients.

**Table S13.** Information summary of Partial Least Square Analysis (PLS) based only on the relative peak areas of the most predictive VOCs identified in sugarcane-based syrups samples.

| Analysis | Component | R <sup>2</sup> X | Eigenvalues | R <sup>2</sup> Y | Q <sup>2</sup> | Significance | Iterations |
|----------|-----------|------------------|-------------|------------------|----------------|--------------|------------|
| PLS      | 1         | 0.6370           | 22.931      | 0.0585           | 0.0104         | S            | 5          |
|          | 2         | 0.1211           | 4.359       | 0.0588           | 0.0224         | S            | 8          |
|          | 3         | 0.0720           | 2.590       | 0.0588           | 0.0209         | S            | 16         |
|          | 4         | 0.0479           | 1.725       | 0.0585           | 0.0169         | S            | 11         |
|          | 5         | 0.0332           | 1.196       | 0.0580           | 0.0214         | S            | 14         |
|          | 6         | 0.0228           | 0.822       | 0.0581           | 0.0346         | S            | 10         |
|          | 7         | 0.0158           | 0.569       | 0.0584           | 0.0242         | S            | 14         |
|          | 8         | 0.0122           | 0.440       | 0.0582           | 0.0340         | S            | 20         |
|          | 9         | 0.0089           | 0.321       | 0.0579           | 0.0271         | S            | 8          |
|          | 10        | 0.0069           | 0.250       | 0.0581           | 0.0350         | S            | 10         |
|          | 11        | 0.0054           | 0.194       | 0.0561           | 0.0454         | S            | 37         |
|          | 12        | 0.0046           | 0.164       | 0.0578           | 0.0584         | S            | 18         |

|    |        |       |        |        |   |    |
|----|--------|-------|--------|--------|---|----|
| 13 | 0.0035 | 0.126 | 0.0571 | 0.0721 | S | 18 |
| 14 | 0.0030 | 0.107 | 0.0569 | 0.1358 | S | 19 |
| 15 | 0.0023 | 0.083 | 0.0554 | 0.1979 | S | 8  |
| 16 | 0.0011 | 0.040 | 0.0551 | 0.3034 | S | 8  |
| 17 | 0.0005 | 0.017 | 0.0488 | 0.5225 | S | 5  |
| 18 | 0.0006 | 0.018 | 0.0060 | 0.0654 | S | 9  |

**Table S14.** Results of variables from Linear Discriminant Analysis (LDA) after matrix reduction method to 20 % of original dimension according with higher on the variable importance in projection (VIP) scores values from the PLS analysis based on the relative peak areas of the identified VOCs in sugarcane-based syrups samples.

| Volatile Organic Compounds       | Abbreviations | PLS              |               | LDA                    |                |
|----------------------------------|---------------|------------------|---------------|------------------------|----------------|
|                                  |               | VIP <sup>1</sup> |               | W <sup>2</sup>         | F <sup>3</sup> |
|                                  |               | Importance       | Power (x 100) |                        |                |
| 4-Hydroxy-Dihydro-2(3H)-Furanone | DHYHYFURONE   | 1                | 16.66         | 3.65E-01               | 11.01          |
| 2,5-Dimethyl-Pyrazine            | DM25PYZNE     | 2                | 16.06         | 1.08E-01               | 52.36          |
| m-Menthane                       | MMTHANE       | 3                | 14.24         | 1.52E-01               | 35.32          |
| 3,5-Dimethyl-Dihydro-2-Furanone  | DM35DHFURONE  | 4                | 14.09         | 7.00E-02               | 84.12          |
| 2-Ethyl-Hexanoic Acid            | E2HXNOIC      | 5                | 13.32         | 1.74E-01               | 30.00          |
| 5-(Hydroxymethyl)-2-Furfural     | HM5FURAL      | 6                | 12.56         | 9.88E-02               | 57.78          |
| 3-Furanmethanol                  | FUR3OL        | 7                | 12.56         | 3.37E-01               | 12.46          |
| 2-Heptanone                      | HPT2ONE       | 8                | 12.53         | 1.25E-01               | 44.35          |
| Toluene                          | TOLNE         | 9                | 12.22         | 1.70E-01               | 30.92          |
| 3-Hydroxy-2,3-Dihydro-Maltol     | HX3DH23MALTOL | 10               | 12.00         | 5.06E-02               | 118.94         |
| 3-Methyl-Furfural                | M3FURAL       | 11               | 11.78         | 5.51E-02               | 108.69         |
| Hexane                           | HXANE         | 12               | 11.76         | 7.81E-02               | 74.72          |
| 1,3-Dihydroxy-2-Propanone        | DHYPPAONE     | 13               | 11.74         | 1.39E-01               | 39.10          |
| Dimethyl Disulfide               | DMDSFD        | 14               | 11.58         | Removed from analysis. |                |
| Furan                            | FUR           | 15               | 11.50         | 5.16E-02               | 116.40         |
| 1-(2-Furanyl)-1,2-Ethanediol     | FURYLETDIOL   | 16               | 11.49         | 1.52E-01               | 35.27          |
| Ethyl Formate                    | EESTFA        | 17               | 11.06         | 9.00E-02               | 64.02          |

|                                     |             |    |       |          |        |
|-------------------------------------|-------------|----|-------|----------|--------|
| Tetrahydro-5-Methyl-2-Furanmethanol | TEHYMFUROL  | 18 | 11.01 | 2.45E-01 | 19.50  |
| 2,5-Dimethyl-Furan                  | DM25FUR     | 19 | 10.87 | 3.60E-01 | 11.28  |
| 2-Hydroxy-Dihydro-2(3H)-Furanone    | HY2DHFURONE | 20 | 10.86 | 5.74E-02 | 104.08 |
| Pentane                             | PTANE       | 21 | 10.79 | 1.47E-01 | 36.65  |
| 1,3-Diazine                         | D13ZINE     | 22 | 9.98  | 2.12E-01 | 23.53  |
| Benzenemethanol                     | BENZMTOL    | 23 | 9.96  | 7.13E-02 | 82.55  |
| Furaneol                            | FUREOL      | 24 | 9.95  | 2.44E-01 | 19.66  |
| Dodecanoic Acid                     | DODECOIC    | 25 | 9.95  | 4.00E-02 | 151.93 |
| Propanoic Acid                      | PPANOIC     | 26 | 9.90  | 2.88E-01 | 15.69  |
| 2-Methyl-Furan                      | M2FUR       | 27 | 9.83  | 2.44E-01 | 19.67  |
| 2-Propyl-Furan                      | PP2FUR      | 28 | 9.81  | 1.35E-01 | 40.60  |
| Nonanal                             | NONAL       | 29 | 9.71  | 1.69E-01 | 31.04  |
| 2-Propenal                          | PPENAL      | 30 | 9.70  | 1.16E-01 | 48.21  |
| $\beta$ -Damascenone                | DAMSNONE    | 31 | 9.69  | 2.90E-01 | 15.50  |
| Dimethyl Sulfide                    | DMSULFI     | 32 | 9.61  | 1.43E-01 | 38.09  |
| Decanal                             | DECAL       | 33 | 9.61  | 1.45E-01 | 37.49  |

---

<sup>1</sup>F - Fischer value from One-way ANOVA test.

<sup>2</sup>W - Wilks value from Linear Discriminant Analysis.

<sup>3</sup>F - Fischer value from Linear Discriminant Analysis.

<sup>4</sup>CDF - Canonical Discriminant Function Coefficients.
